# Supplementary material for: New mechanism for autoxidation of polyolefins: kinetic Monte Carlo modelling of the role of short-chain branches, molecular oxygen and unsaturated moieties
Source: Royal Society of Chemistry journal article supplement (doi:10.1039/d1py01659h), 2022-01-01
Supplement: d1py01659h1.pdf [file d1py01659h1.pdf]

## **Supporting Information for “New Mechanism for Autoxidation of polyolefins: kinetic Monte Carlo Modelling of the Role of Short-chain Branches, Molecular Oxygen and Unsaturated Moieties”**

Lies De Keer,<sup>1</sup> Paul Van Steenberge,<sup>1,\*</sup> Marie-Francoise Reyniers<sup>1</sup>

<sup>1</sup>Department of Materials, Textiles and Chemical Engineering, Laboratory for Chemical Technology, Ghent University, Technologiepark 125, 9052 Zwijnaarde, Belgium

Ganna Gryn'ova,<sup>2,3</sup> Heather M. Aitken,<sup>2</sup> Michelle L. Coote<sup>2,\*</sup>

<sup>2</sup>ARC Centre of Excellence for Electromaterials Science, Research School of Chemistry, Australian National University, Canberra, Australian Capital Territory, 2601, Australia

<sup>3</sup>Heidelberg Institute for Theoretical Studies (HITS gGmbH), and Interdisciplinary Center for Scientific Computing (IWR), Heidelberg University, Heidelberg, Germany

\*Corresponding author: [Paul.VanSteenberge@UGent.be](mailto:Paul.VanSteenberge@UGent.be); [michelle.coote@anu.edu.au](mailto:michelle.coote@anu.edu.au)

## S1. Details of computational framework

**Table S1.** Energetics of the hydrogen abstraction calculations: ZPVE-corrected energies, enthalpies and Gibbs free energies in the gas phase at 298K; Calculations performed at the G3(MP2)CC// M062X/6-31+G(d,p) level of theory.

|                                       |                                                  |                                                  |                      |                                                 |                                                 |
|---------------------------------------|--------------------------------------------------|--------------------------------------------------|----------------------|-------------------------------------------------|-------------------------------------------------|
|                                       |                                                  |                                                  |                      |                                                 |                                                 |
| $\Delta G$<br>(kJ mol <sup>-1</sup> ) | $\Delta G^\ddagger_f$<br>(kJ mol <sup>-1</sup> ) | $\Delta G^\ddagger_r$<br>(kJ mol <sup>-1</sup> ) | $\kappa(T)$          | $k_f$<br>(L mol <sup>-1</sup> s <sup>-1</sup> ) | $k_r$<br>(L mol <sup>-1</sup> s <sup>-1</sup> ) |
| 0.0                                   | 103.4                                            | 103.4                                            | 3.8E+01              | 1.2E-04                                         | 1.2E-04                                         |
| $\Delta H$                            | $\Delta H^\ddagger_f$                            | $\Delta H^\ddagger_r$                            | $\Delta E$           | $\Delta E^\ddagger_f$                           | $\Delta E^\ddagger_r$                           |
| 0.0                                   | 52.3                                             | 52.3                                             | 0.0                  | 61.0                                            | 61.0                                            |
|                                       |                                                  |                                                  |                      |                                                 |                                                 |
| $\Delta G$                            | $\Delta G^\ddagger_f$                            | $\Delta G^\ddagger_r$                            | $\kappa(T)$          | $k_f$                                           | $k_r$                                           |
| -37.8                                 | 66.2                                             | 104.0                                            | 5.8E+00              | 3.8E+02                                         | 9.2E-05                                         |
| $\Delta H$                            | $\Delta H^\ddagger_f$                            | $\Delta H^\ddagger_r$                            | $\Delta E$           | $\Delta E^\ddagger_f$                           | $\Delta E^\ddagger_r$                           |
| -32.6                                 | 18.0                                             | 50.6                                             | -31.2                | 26.8                                            | 58.0                                            |
|                                       |                                                  |                                                  |                      |                                                 |                                                 |
| $\Delta G$                            | $\Delta G^\ddagger_f$                            | $\Delta G^\ddagger_r$                            | $\kappa(T)$          | $k_f$                                           | $k_r$                                           |
| 50.1                                  | 124.2                                            | 74.0                                             | 3.2E+02              | 2.7E-08                                         | 1.6E+01                                         |
| $\Delta H$                            | $\Delta H^\ddagger_f$                            | $\Delta H^\ddagger_r$                            | $\Delta E$           | $\Delta E^\ddagger_f$                           | $\Delta E^\ddagger_r$                           |
| 56.3                                  | 74.2                                             | 17.9                                             | 62.8                 | 88.3                                            | 25.6                                            |
|                                       |                                                  |                                                  |                      |                                                 |                                                 |
| $\Delta G$                            | $\Delta G^\ddagger_f$                            | $\Delta G^\ddagger_r$                            | $\kappa(T)$          | $k_f$                                           | $k_r$                                           |
| 1.90                                  | 97.00                                            | 95.10                                            | 1.18×10 <sup>1</sup> | 1.82×10 <sup>-2</sup>                           | 3.92×10 <sup>-2</sup>                           |
| $\Delta H$                            | $\Delta H^\ddagger_f$                            | $\Delta H^\ddagger_r$                            | $\Delta E$           | $\Delta E^\ddagger_f$                           | $\Delta E^\ddagger_r$                           |
| 4.20                                  | 54.57                                            | 50.37                                            | 5.57                 | 62.07                                           | 56.50                                           |
|                                       |                                                  |                                                  |                      |                                                 |                                                 |
| $\Delta G$                            | $\Delta G^\ddagger_f$                            | $\Delta G^\ddagger_r$                            | $\kappa(T)$          | $k_f$                                           | $k_r$                                           |
| -41.80                                | 70.87                                            | 112.67                                           | 6.57×10 <sup>0</sup> | 3.84×10 <sup>2</sup>                            | 1.82×10 <sup>-5</sup>                           |
| $\Delta H$                            | $\Delta H^\ddagger_f$                            | $\Delta H^\ddagger_r$                            | $\Delta E$           | $\Delta E^\ddagger_f$                           | $\Delta E^\ddagger_r$                           |
| -36.88                                | 25.17                                            | 62.05                                            | -33.49               | 33.20                                           | 66.69                                           |

|                                                                                      |                       |                       |                    |                       |                       |
|--------------------------------------------------------------------------------------|-----------------------|-----------------------|--------------------|-----------------------|-----------------------|
| 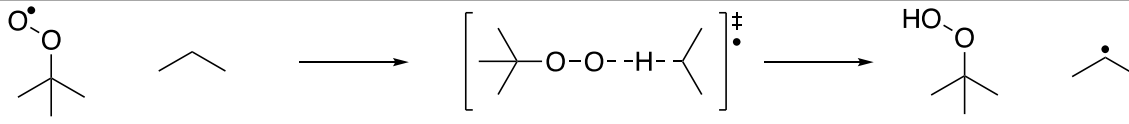   |                       |                       |                    |                       |                       |
| <b>200</b>                                                                           | <b>1H</b>             | <b>TS-200</b>         |                    | <b>200H</b>           | <b>1</b>              |
| $\Delta G$                                                                           | $\Delta G_f^\ddagger$ | $\Delta G_r^\ddagger$ | $\kappa(T)$        | $k_f$                 | $k_r$                 |
| 47.13                                                                                | 126.15                | 79.02                 | $3.30 \times 10^1$ | $3.97 \times 10^{-7}$ | $7.18 \times 10^1$    |
| $\Delta H$                                                                           | $\Delta H_f^\ddagger$ | $\Delta H_r^\ddagger$ | $\Delta E$         | $\Delta E_f^\ddagger$ | $\Delta E_r^\ddagger$ |
| 53.03                                                                                | 81.40                 | 28.37                 | 59.10              | 92.74                 | 33.64                 |
|    |                       |                       |                    |                       |                       |
| $\Delta G$                                                                           | $\Delta G_f^\ddagger$ | $\Delta G_r^\ddagger$ | $\kappa(T)$        | $k_f$                 | $k_r$                 |
| 0.0                                                                                  | 109.6                 | 109.6                 | $5.2E+01$          | $9.6E-06$             | $9.6E-06$             |
| $\Delta H$                                                                           | $\Delta H_f^\ddagger$ | $\Delta H_r^\ddagger$ | $\Delta E$         | $\Delta E_f^\ddagger$ | $\Delta E_r^\ddagger$ |
| 0.0                                                                                  | 68.7                  | 68.7                  | 0.0                | 74.0                  | 74.0                  |
|    |                       |                       |                    |                       |                       |
| $\Delta G$                                                                           | $\Delta G_f^\ddagger$ | $\Delta G_r^\ddagger$ | $\kappa(T)$        | $k_f$                 | $k_r$                 |
| -97.0                                                                                | 49.3                  | 146.3                 | $2.4E+00$          | $3.4E+05$             | $3.5E-12$             |
| $\Delta H$                                                                           | $\Delta H_f^\ddagger$ | $\Delta H_r^\ddagger$ | $\Delta E$         | $\Delta E_f^\ddagger$ | $\Delta E_r^\ddagger$ |
| -95.6                                                                                | 0.3                   | 95.9                  | -96.8              | 7.4                   | 104.2                 |
|  |                       |                       |                    |                       |                       |
| $\Delta G$                                                                           | $\Delta G_f^\ddagger$ | $\Delta G_r^\ddagger$ | $\kappa(T)$        | $k_f$                 | $k_r$                 |
| -16.6                                                                                | 86.9                  | 103.5                 | $8.0E+02$          | $9.0E-02$             | $1.1E-04$             |
| $\Delta H$                                                                           | $\Delta H_f^\ddagger$ | $\Delta H_r^\ddagger$ | $\Delta E$         | $\Delta E_f^\ddagger$ | $\Delta E_r^\ddagger$ |
| -15.5                                                                                | 35.6                  | 51.0                  | -14.1              | 45.2                  | 59.4                  |

**Table S2.** Raw computational data: entropies ( $\text{J mol}^{-1} \text{K}^{-1}$ ), thermal corrections and total energies (in Hartrees, 298.15 K); related to Table S1.

| <i>Species</i> | <i>Entropy (<math>S^{298}</math>)</i><br>( $\text{J mol}^{-1} \text{K}^{-1}$ ) | <i>TC<sup>298</sup></i> | <i>ZPVE</i> | <i>HLC</i> | <i>SO</i> | <i>M06-2X</i> | <i>MP2/small</i> | <i>MP2/large</i> | <i>URCCSD(T)</i> | <i>E<sub>0</sub></i> | <i>H<sup>298</sup></i> | <i>G<sup>298</sup></i> |
|----------------|--------------------------------------------------------------------------------|-------------------------|-------------|------------|-----------|---------------|------------------|------------------|------------------|----------------------|------------------------|------------------------|
| <b>1</b>       | 277.427                                                                        | 0.09                    | 0.09        | -0.09      | 0.00      | -118.41       | -118.01          | -118.17          | -118.06          | -118.31              | -118.14                | -118.17                |
| <b>1H</b>      | 258.704                                                                        | 0.10                    | 0.10        | -0.10      | 0.00      | -119.08       | -118.66          | -118.83          | -118.72          | -118.99              | -118.79                | -118.82                |
| <b>1O</b>      | 299.35                                                                         | 0.01                    | 0.09        | -0.12      | 0.00      | -193.60       | -193.03          | -193.27          | -193.10          | -193.45              | -193.35                | -193.39                |
| <b>1OH</b>     | 296.91                                                                         | 0.01                    | 0.11        | -0.12      | 0.00      | -194.27       | -193.69          | -193.95          | -193.75          | -194.14              | -194.02                | -194.06                |
| <b>1OO</b>     | 325.09                                                                         | 0.01                    | 0.10        | -0.15      | 0.00      | -268.74       | -268.00          | -268.33          | -268.08          | -268.55              | -268.44                | -268.48                |
| <b>1OOH</b>    | 325.98                                                                         | 0.01                    | 0.11        | -0.15      | 0.00      | -269.38       | -268.63          | -268.97          | -268.70          | -269.19              | -269.07                | -269.11                |
| <b>TS-1</b>    | 396.42                                                                         | 0.01                    | 0.19        | -0.18      | 0.00      | -237.46       | -236.64          | -236.99          | -236.75          | -237.28              | -237.07                | -237.12                |
| <b>TS-1O</b>   | 411.71                                                                         | 0.01                    | 0.20        | -0.21      | 0.00      | -312.67       | -311.67          | -312.09          | -311.79          | -312.43              | -312.22                | -312.27                |
| <b>TS-1OO</b>  | 431.49                                                                         | 0.01                    | 0.20        | -0.24      | 0.00      | -387.78       | -386.63          | -387.14          | -386.76          | -387.50              | -387.29                | -387.34                |
| <b>2</b>       | 295.48                                                                         | 0.12                    | 0.11        | -0.12      | 0.00      | -157.71       | -157.18          | -157.39          | -157.25          | -157.58              | -157.35                | -157.38                |
| <b>2H</b>      | 284.49                                                                         | 0.13                    | 0.13        | -0.13      | 0.00      | -158.37       | -157.84          | -158.06          | -157.90          | -158.25              | -157.99                | -158.03                |
| <b>2O</b>      | 306.24                                                                         | 0.12                    | 0.12        | -0.15      | 0.00      | -232.90       | -232.21          | -232.49          | -232.29          | -232.72              | -232.48                | -232.51                |
| <b>2OH</b>     | 304.01                                                                         | 0.14                    | 0.13        | -0.16      | 0.00      | -233.58       | -232.88          | -233.18          | -232.95          | -233.41              | -233.14                | -233.17                |
| <b>2OO</b>     | 328.19                                                                         | 0.13                    | 0.12        | -0.18      | 0.00      | -308.04       | -307.19          | -307.55          | -307.28          | -307.81              | -307.56                | -307.60                |
| <b>2OOH</b>    | 329.24                                                                         | 0.14                    | 0.14        | -0.19      | 0.00      | -308.68       | -307.83          | -308.20          | -307.90          | -308.46              | -308.19                | -308.22                |
| <b>TS-2</b>    | 411.87                                                                         | 0.22                    | 0.21        | -0.22      | 0.00      | -276.77       | -275.83          | -276.21          | -275.94          | -276.54              | -276.12                | -276.16                |
| <b>TS-2O</b>   | 411.67                                                                         | 0.22                    | 0.22        | -0.25      | 0.00      | -351.97       | -350.86          | -351.32          | -350.99          | -351.69              | -351.26                | -351.30                |
| <b>TS-2OO</b>  | 436.78                                                                         | 0.23                    | 0.22        | -0.28      | 0.00      | -427.09       | -425.83          | -426.36          | -425.96          | -426.76              | -426.32                | -426.37                |
| <b>5</b>       | 335.85                                                                         | 0.01                    | 0.12        | -0.14      | 0.00      | -195.80       | -195.16          | -195.41          | -195.24          | -195.63              | -195.50                | -195.54                |
| <b>5H</b>      | 330.98                                                                         | 0.01                    | 0.14        | -0.14      | 0.00      | -196.44       | -195.79          | -196.05          | -195.87          | -196.27              | -196.13                | -196.17                |
| <b>5O</b>      | 355.56                                                                         | 0.01                    | 0.13        | -0.16      | 0.00      | -270.96       | -270.16          | -270.48          | -270.25          | -270.74              | -270.61                | -270.65                |
| <b>5OH</b>     | 355.41                                                                         | 0.01                    | 0.14        | -0.17      | 0.00      | -271.64       | -270.82          | -271.17          | -270.90          | -271.42              | -271.27                | -271.31                |
| <b>5OO</b>     | 381.99                                                                         | 0.01                    | 0.13        | -0.19      | 0.00      | -346.10       | -345.13          | -345.54          | -345.23          | -345.84              | -345.69                | -345.74                |
| <b>5OOH</b>    | 380.89                                                                         | 0.01                    | 0.15        | -0.20      | 0.00      | -346.74       | -345.76          | -346.19          | -345.86          | -346.48              | -346.33                | -346.37                |
| <b>TS-5</b>    | 529.74                                                                         | 0.02                    | 0.26        | -0.28      | 0.00      | -392.21       | -390.92          | -391.44          | -391.08          | -391.87              | -391.60                | -391.66                |
| <b>TS-5O</b>   | 522.16                                                                         | 0.02                    | 0.26        | -0.31      | 0.00      | -467.40       | -465.93          | -466.53          | -466.11          | -467.01              | -466.73                | -466.79                |
| <b>TS-5OO</b>  | 540.74                                                                         | 0.02                    | 0.27        | -0.33      | 0.00      | -542.52       | -540.90          | -541.58          | -541.08          | -542.09              | -541.81                | -541.87                |

**Table S3.** Gaussian archive entries.

| <i>i-propyl</i>                                                                                                                                                                                                                                                                                                                                                                                                                                                                                                                                                                                                                                                                                                                                                                                                                                                                                                                                                   |
|-------------------------------------------------------------------------------------------------------------------------------------------------------------------------------------------------------------------------------------------------------------------------------------------------------------------------------------------------------------------------------------------------------------------------------------------------------------------------------------------------------------------------------------------------------------------------------------------------------------------------------------------------------------------------------------------------------------------------------------------------------------------------------------------------------------------------------------------------------------------------------------------------------------------------------------------------------------------|
| 1.M062X<br>1\1\GINC-N0305\FOpt\UM062X\6-31+G(d,p)\C3H7(2)\HD_IL182\19-Apr-2021\0\<br>\#UM062X/6-31+G(d,p) SCF=Tight INT(grid=ultrafine) OPT IOP(2/17=4) Nos<br>ymm\1.m062x.freq\0,2\C,-0.0921929371,0.5006990291,0.\C,-0.051335525,<br>-0.2450606377,1.2902852043\C,-0.051335525,-0.2450606377,-1.2902852043\<br>H,-0.4186404468,1.5353678686,0.\H,0.7679775191,-0.975071063,1.29811834<br>91\H,-0.9774169248,-0.8184520775,1.4605543162\H,0.0791016226,0.4220103<br>302,2.1459938436\H,0.7679775191,-0.975071063,-1.2981183491\H,0.0791016<br>226,0.4220103302,-2.1459938436\H,-0.9774169248,-0.8184520775,-1.460554<br>3162\\Version=ES64L-G16RevC.01\HF=-118.4107693\S2=0.755192\S2-1=0.\S2A<br>=0.750022\RMSD=9.531e-09\RMSF=4.270e-06\Dipole=-0.0858553,-0.0634397,0<br>.\Quadrupole=-0.4683822,0.1796789,0.2887032,-0.3569512,0.,0.\PG=CS [SG<br>(C1H1),X(C2H6)]\@                                                                                          |
| 1H.M062X<br>1\1\GINC-N0615\FOpt\RM062X\6-31+G(d,p)\C3H8\HD_IL182\19-Apr-2021\0\#M<br>062X/6-31+G(d,p) SCF=Tight INT(grid=ultrafine) OPT IOP(2/17=4) Nosymm\<br>\1h.m062x.freq\0,1\C,0.1246375786,0.6003187181,0.\C,-0.0187289082,-0.<br>2402394881,1.2674592728\C,-0.0187289082,-0.2402394881,-1.2674592728\H,<br>-0.6298278192,1.395471023,0.\H,0.7439021899,-1.025537944,1.3015016325\<br>H,-0.9983571865,-0.7288720647,1.3009953522\H,0.0845962938,0.3679526495<br>,2.1706209824\H,0.7439021899,-1.025537944,-1.3015016325\H,0.0845962938<br>,0.3679526495,-2.1706209824\H,-0.9983571865,-0.7288720647,-1.300995352<br>2\H,1.1001554627,1.1003839536,0.\\Version=ES64L-G16RevC.01\HF=-119.075<br>8964\RMSD=1.881e-09\RMSF=2.543e-05\Dipole=0.0057716,0.0338189,0.\Quadr<br>upole=0.2980902,-0.0386869,-0.2594033,-0.057908,0.,0.\PG=CS [SG(C1H2),<br>X(C2H6)]\@                                                                                                |
| 1O.M062X<br>1\1\GINC-R193\FOpt\UM062X\6-31+G(d,p)\C3H7O1(2)\ROOT\07-Sep-2017\0\#<br>M062X/6-31+G** SCF=Tight INT(grid=ultrafine) OPT(tight) IOP(2/17=4) ma<br>xdisk=671088640\1O.M062X\0,2\C,0.,-0.0205875391,-0.3298820354\C,1.27<br>87104619,0.6962796328,0.1071688495\C,-1.2787104619,0.6962796328,0.1071<br>688495\H,0.,-0.094999667,-1.4381587832\H,1.3143909072,0.7547222963,1.1<br>991867932\H,1.3083235211,1.7140703815,-0.2916898354\H,2.1578581934,0.1<br>497567276,-0.2403347638\H,-1.3143909072,0.7547222963,1.1991867932\H,-2<br>.1578581934,0.1497567276,-0.2403347638\H,-1.3083235211,1.7140703815,-0<br>.2916898354\O,0.,-1.3480308702,0.0415387316\\Version=ES64L-G09RevE.01\<br>State=2-A'\HF=-193.5998045\S2=0.754119\S2-1=0.\S2A=0.750013\RMSD=8.080<br>e-09\RMSF=1.948e-06\Dipole=0.,0.8206687,-0.2525468\Quadrupole=0.651891<br>4,-2.2317469,1.5798554,0.,0.,0.348956\PG=CS [SG(C1H1O1),X(C2H6)]\@                                          |
| 1OH.a2<br>1\1\GINC-R2580\FOpt\RM062X\6-31+G(d,p)\C3H8O1\ROOT\04-Sep-2017\0\#M06<br>2X/6-31+G** SCF=Tight IOP(2/17=4) INT(grid=ultrafine) Opt maxdisk=6710<br>88640\1a2\0,1\C,0.0120475984,0.0320752469,-0.405569876\C,1.2715838447<br>,0.7288791977,0.0951961923\C,-1.2525175102,0.703418834,0.099726269\H,0<br>.0069363631,0.0425054225,-1.5067201186\H,1.2878899946,0.7249499353,1.1<br>895580426\H,1.3084830874,1.7654525983,-0.2534067825\H,2.1738070588,0.2<br>223750218,-0.2650518822\H,-1.2629961792,0.6952808167,1.1940739397\H,-2<br>.1347251004,0.1670208752,-0.2574550909\H,-1.304443944,1.7395508343,-0.<br>2461057061\O,-0.0421671064,-1.3149852105,0.0527707743\H,0.7555298933,-<br>1.7765545723,-0.2286087615\\Version=ES64L-G09RevE.01\State=1-A'\HF=-194<br>.2739052\RMSD=2.660e-09\RMSF=9.415e-06\Dipole=0.5122202,0.3157429,-0.3<br>538769\Quadrupole=0.5343166,-0.2684439,-0.2658727,-2.2276977,-0.253588<br>8,0.9183002\PG=C01 [X(C3H8O1)]\@ |

100.a2

```
1\1\GINC-R358\FOpt\UM062X\6-31+G(d,p)\C3H7O2(2)\ROOT\04-Sep-2017\0\#\#M062X/6-31+G** SCF=Tight IOP(2/17=4) INT(grid=ultrafine) Opt maxdisk=671088640\|a2\|0,2\C,-0.4801603571,0.0294028066,0.5986479323\C,0.254810588,1.2848596079,1.0289674164\C,0.2281508795,-1.2577276797,0.9706680278\H,-1.5136162016,0.0380080414,0.9596091417\H,1.2747468229,1.2805925123,0.6330182458\H,0.3041184929,1.3283147898,2.1203493737\H,-0.2660743307,2.1727821479,0.6653182565\H,1.2354998551,-1.2737087381,0.5448180139\H,-0.3217737706,-2.1276094336,0.6046675763\H,0.311874155,-1.3290304095,2.0580127312\O,-0.5736422081,0.0092898496,-0.8589284219\O,-1.3730439254,0.9344115053,-1.3048102937\|Version=ES64L-G09RevE.01\State=2-A\HF=-268.7398137\S2=0.755092\S2-1=0.\S2A=0.750015\RMSD=3.670e-09\RMSF=1.899e-05\Dipole=0.4009394,-0.2979332,1.1287045\Quadrupole=0.3500315,0.9869892,-1.3370207,0.7791483,-1.164388,0.4273772\PG=C01 [X(C3H7O2)]\|@
```

100H.a2b3

```
1\1\GINC-R2608\FOpt\RM062X\6-31+G(d,p)\C3H8O2\ROOT\04-Sep-2017\0\#\#M062X/6-31+G** SCF=Tight IOP(2/17=4) INT(grid=ultrafine) Opt maxdisk=671088640\|a2 b3\|0,1\C,-0.4786052123,-0.0535279618,-0.7026317929\C,0.3214815492,-1.2797541299,-1.111513416\C,0.2406905706,1.2506734227,-1.0057816924\H,-1.4656131552,-0.0657648014,-1.18667424\H,1.3047758959,-1.2591780555,-0.6315364136\H,0.4603321061,-1.2947174004,-2.1966360829\H,-0.1962790199,-2.1931084952,-0.8127826471\H,1.2004740133,1.2807487616,-0.4818372309\H,-0.3568377196,2.109886263,-0.6923091843\H,0.4294396384,1.3262446894,-2.0798095134\O,-0.6824387096,-0.0247702448,0.7116739678\O,-1.4754389531,-1.1610301991,1.0552973106\H,-2.2672030038,-0.7316268486,1.4087029351\|Version=ES64L-G09RevE.01\State=1-A\HF=-269.37873\RMSD=3.087e-09\RMSF=9.629e-06\Dipole=-0.3887213,0.3205053,-0.4862838\Quadrupole=2.3635462,-1.7180158,-0.6455303,-0.1652483,-2.2020526,0.2180585\PG=C01 [X(C3H8O2)]\|@
```

TS-1.a1

```
1\1\GINC-R241\FTS\UM062X\6-31+G(d,p)\C6H15(2)\ROOT\04-Sep-2017\0\#\#M062X/6-31+G** SCF=Tight IOP(2/17=4) INT(grid=ultrafine) OPT(TS,calcfc,no eigentest,maxcyc=200) maxdisk=671088640\|a1\|0,2\C,0.3978243118,0.7261986191,0.1213029303\C,-0.3073798981,1.7291131954,1.0059634349\C,0.489410714,-0.6757911484,0.679508407\H,0.0631414551,0.7574416819,-0.9199134911\H,0.1376612478,1.7436159047,2.0077234422\H,-1.3709779937,1.4803036549,1.1264975722\H,-0.2486049825,2.7420943929,0.595520219\H,1.0042474226,-0.6753716114,1.6481824827\H,1.034404041,-1.3456652216,0.0076996685\H,-0.507567885,-1.1082958637,0.8445746222\C,2.9653447291,1.5338139978,0.0972407335\C,3.7480543093,0.2977851229,-0.2840593288\C,3.1794695141,2.0233958573,1.5114528177\H,3.0231447824,2.3300984525,-0.6508932209\H,3.5692580895,-0.5115993623,0.4333811445\H,4.8294406735,0.4933251182,-0.290469932\H,3.471185868,-0.0653046148,-1.2788281844\H,2.9265308122,1.2397956186,2.2362825194\H,2.5654511014,2.9009864588,1.7348217868\H,4.2293027256,2.297939672,1.6868155847\H,1.6703693681,1.1633791389,0.0374515482\|Version=ES64L-G09RevE.01\State=2-A\HF=-237.4647076\S2=0.758678\S2-1=0.\S2A=0.750041\RMSD=8.118e-09\RMSF=2.714e-06\Dipole=-0.0031753,0.0096079,-0.0207877\Quadrupole=-0.0287363,-0.0340585,0.0627947,0.1281328,0.0817363,-0.0895912\PG=C01 [X(C6H15)]\|@
```

TS-10.a1c3

```
1\1\GINC-R123\FTS\UM062X\6-31+G(d,p)\C6H15O1(2)\ROOT\05-Sep-2017\0\#\#M062X/6-31+G** SCF=Tight IOP(2/17=4) INT(grid=ultrafine) OPT(TS,calcfc,no eigentest,maxcyc=200) maxdisk=671088640\|a1 b1 c3\|0,2\C,-1.8892666325,-1.5984081729,0.7828466338\C,-1.9485588943,-1.6381988837,-0.7407519942\C,-2.7671916613,-0.4808523129,1.3549557179\H,-2.2448083202,-2.5574229205,1.1960852219\H,-1.6087562177,-0.6811031235,-1.1485009483\H,-2.9687342667,-1.829241714,-1.0885465115\H,-1.2988214449,-2.4264557092,-1.1343524159\H,-2.4297976532,0.4870542185,0.9735172713\H,-2.7084750394,-
```

0.4685872039,2.4451789807\H,-3.807318705,-0.6371503387,1.0541297634\O,  
-0.594165846,-1.3281418556,1.2509164693\C,0.7880729087,-3.3741904251,0  
.6845605011\C,-0.1539188929,-4.534832651,0.9262887387\C,1.9561588921,-  
3.2924130315,1.6459861762\H,1.0989225798,-3.2942133396,-0.3626981705\H  
, -0.5461879086,-4.508459513,1.9486034973\H,0.3723538244,-5.4894058381,  
0.7980681154\H,-1.0006432704,-4.528666944,0.232849864\H,1.6008935673,-  
3.2588343006,2.6805847999\H,2.5626432657,-2.401744239,1.464688109\H,2.  
6038205559,-4.1723170707,1.5410074391\H,0.161375159,-2.351765631,0.880  
1497415\Version=ES64L-G09RevE.01\State=2-A\HF=-312.6659354\S2=0.75881  
4\S2-1=0.\S2A=0.750037\RMSD=6.311e-09\RMSF=4.241e-06\Dipole=-0.2350802  
, -0.5463077,-0.2711747\Quadrupole=1.7334593,-0.8312014,-0.9022579,-1.9  
174141,-0.2455096,-0.5935546\PG=C01 [X(C6H15O1)]\@

TS-100.alc3

1\1\GINC-R3091\FTS\UM062X\6-31+G(d,p)\C6H15O2(2)\ROOT\05-Sep-2017\0\#\#  
M062X/6-31+G\*\* SCF=Tight IOP(2/17=4) INT(grid=ultrafine) OPT(TS,calcfc  
,noeigentest,maxcyc=200) maxdisk=1073741824\#a1 b1 c3\0,2\C,-0.631643  
3996,-0.6803578791,0.0968256692\C,0.4205054823,-0.5647047554,-0.992187  
0478\C,-0.0378696335,-0.8879918448,1.4804092056\H,-1.2867800527,0.2020  
436427,0.094858604\H,1.0265877104,-1.4748314885,-1.0264509747\H,1.0792  
187246,0.2826506953,-0.7846494935\H,-0.0418839946,-0.4177250091,-1.971  
7399312\H,0.6174061301,-1.7645689894,1.4773865722\H,-0.8317566283,-1.0  
443457966,2.2133599168\H,0.5479151213,-0.0127117273,1.7764549741\O,-1.  
4321666163,-1.8109167892,-0.2804070202\O,-2.5361870453,-1.8841221543,0  
.5548733304\C,-4.2443601973,-1.0124446311,-1.0634150136\C,-4.332896081  
5,-2.2219010736,-1.9591264597\C,-3.5832340985,0.2022061155,-1.66372152  
82\H,-5.1522764929,-0.7982447835,-0.492498746\H,-3.3357515459,-2.50625  
74037,-2.3118831609\H,-4.951021782,-2.0047571954,-2.8415908313\H,-4.77  
09318903,-3.0780302827,-1.4408944176\H,-2.5808223812,-0.0499531712,-2.  
028677115\H,-3.5013779442,1.0229518772,-0.9461085739\H,-4.1608448246,0  
.5657200734,-2.5253980468\H,-3.41279956,-1.4230564292,-0.1140229119\#V  
ersion=ES64L-G09RevE.01\State=2-A\HF=-387.7842911\S2=0.759691\S2-1=0.\  
S2A=0.750047\RMSD=6.554e-09\RMSF=6.162e-07\Dipole=-0.0235078,0.7906988  
, -0.3910532\Quadrupole=3.2921846,-1.9572434,-1.3349412,0.6119291,1.586  
9407,0.9629497\PG=C01 [X(C6H15O2)]\@

### *t*-butyl

2.M062X

1\1\GINC-N0919\FOpt\UM062X\6-31+G(d,p)\C4H9(2)\HD\_IL182\19-Apr-2021\0\#\#  
UM062X/6-31+G(d,p) SCF=Tight INT(grid=ultrafine) OPT IOP(2/17=4) Nos  
ymm\2.m062x.freq\0,2\C,0.,0.,0.1097135059\C,0.7401406193,-1.28196294  
33,-0.0976400468\C,0.740142166,1.2819620504,-0.0976400468\C,-1.4802827  
853,0.0000008929,-0.0976400468\H,1.7431805951,-1.2436847725,0.33984589  
\H,0.8687498172,-1.5047209186,-1.1715729011\H,0.2054697383,-2.13148131  
29,0.33984589\H,1.7431820955,1.2436826695,0.33984589\H,0.2054723098,2.  
131481065,0.33984589\H,0.8687516325,1.5047198705,-1.1715729011\H,-1.73  
75014497,0.0000010481,-1.1715729011\H,-1.9486518338,0.8877986434,0.339  
84589\H,-1.9486529048,-0.8877962924,0.33984589\Version=ES64L-G16RevC.  
01\HF=-157.712128\S2=0.754946\S2-1=0.\S2A=0.75002\RMSD=4.419e-09\RMSF=  
4.239e-06\Dipole=0.0000069,0.,-0.1184819\Quadrupole=0.2520073,0.251937  
2,-0.5039446,0.,-0.0000224,0.\PG=C03V [C3(C1),3SGV(C1H1),X(H6)]\@

2H.M062X

1\1\GINC-N1009\FOpt\RM062X\6-31+G(d,p)\C4H10\HD\_IL182\19-Apr-2021\0\#\#  
M062X/6-31+G(d,p) SCF=Tight INT(grid=ultrafine) OPT IOP(2/17=4) Nosymm  
\2h.m062x.freq\0,1\C,0.0000707654,0.0000924373,0.3829399251\C,0.7262  
801919,-1.2578485825,-0.0947350502\C,0.7262866314,1.2578985203,-0.0950  
816884\C,-1.452457485,0.0000308375,-0.0947137127\H,1.7612912862,-1.278  
9116364,0.2606547733\H,0.7464588526,-1.2927661556,-1.1905900214\H,0.22  
69375104,-2.1647233146,0.2605617832\H,1.7612974538,1.2790542518,0.2603

034625\H,0.2269480402,2.1648736368,0.2599645205\H,0.7464669535,1.2925129051,-1.1909462255\H,-1.4927796162,-0.00012188,-1.1905678958\H,-1.9881646241,0.8859466704,0.2604747346\H,-1.9881712337,-0.8857817464,0.2607221287\H,0.0001552736,0.0002440563,1.4815832662\\Version=ES64L-G16RevC.01\HF=-158.373817\RMSD=4.556e-09\RMSF=1.142e-04\Dipole=0.000006,0.0000072,0.0533798\Quadrupole=-0.1331176,-0.1328825,0.2660002,-0.000001,0.0001864,0.0000597\PG=C01 [X(C4H10)]\@

#### 2O.M062X

1\1\GINC-N1102\FOpt\UM062X\6-31+G(d,p)\C4H9O1(2)\HD\_IL182\19-Apr-2021\0\#\UM062X\6-31+G(d,p) SCF=Tight INT(grid=ultrafine) OPT IOP(2/17=4) Nosymm\\2o.m062x.freq\0,2\C,-0.0119582111,0.0207159868,0.0550205583\C,0.7271759475,-1.2594991718,-0.4010275113\C,0.7339962233,1.2673577824,-0.4317511075\C,-1.4645588549,-0.0019813231,-0.4317510936\H,1.7553652346,-1.2587584074,-0.0326030344\H,0.737499032,-1.2773792521,-1.4946886716\H,0.2124414502,-2.1495677921,-0.0326030246\H,1.7640212055,1.2553560838,-0.0665013588\H,0.2429822329,2.1694817982,-0.0556432544\H,0.7425736967,1.3104614431,-1.5252335962\H,-1.5061764936,0.0121421135,-1.5252335819\H,-2.0003158089,0.8743102748,-0.0556432402\H,-1.9691758884,-0.9000109146,-0.0665013351\O,0.0361611554,-0.0626290057,1.4371303244\\Version=ES64L-G16RevC.01\HF=-232.9013938\s2=0.753874\s2-1=0.\s2A=0.750012\RMSD=9.704e-09\RMSF=6.936e-06\Dipole=0.0204586,-0.0354401,-0.8556001\Quadrupole=0.866449,1.3502422,-2.2166912,-0.4190353,-0.17644,0.3055808\PG=CS [SG(C2H1O1),X(C2H8)]\@

#### 2OH.a2

1\1\GINC-N0706\FOpt\RM062X\6-31+G(d,p)\C4H10O1\HD\_IL182\19-Apr-2021\0\#\M062X\6-31+G(d,p) SCF=Tight INT(grid=ultrafine) OPT IOP(2/17=4) Nosymm\\2oh.m062x.freq\0,1\C,0.0158008741,0.0113778415,0.2154833001\C,1.5038563271,0.0060752259,-0.1365370931\C,-0.6665746733,1.2653624859,-0.3322950511\C,-0.6676793767,-1.2472702991,-0.3045806703\H,1.9995825928,0.8978180503,0.2649680313\H,1.6511248099,0.0003710103,-1.2210840024\H,1.9862464487,-0.8781929065,0.2891395499\H,-0.1923115404,2.1696802442,0.0670249452\H,-1.7217009677,1.2732927039,-0.0450537879\H,-0.5980212637,1.305088963,-1.4239245793\H,-0.6003647016,-1.3007121351,-1.3950611514\H,-1.7220115141,-1.2469133598,-0.0146230831\H,-0.1925143779,-2.1343430713,0.1232163431\O,-0.1428126811,-0.0410740732,1.6349629603\H,0.2734250439,0.73752932,2.0239172887\\Version=ES64L-G16RevC.01\HF=-233.5755851\RMSD=6.134e-09\RMSF=2.038e-05\Dipole=0.3014652,0.4586057,-0.3945524\Quadrupole=-0.010277,0.7887012,-0.7784242,0.3384742,1.3414199,2.2456144\PG=C01 [X(C4H10O1)]\@

#### 2OO.a1

1\1\GINC-N0721\FOpt\UM062X\6-31+G(d,p)\C4H9O2(2)\HD\_IL182\19-Apr-2021\0\#\UM062X\6-31+G(d,p) SCF=Tight INT(grid=ultrafine) OPT IOP(2/17=4) Nosymm\\2oo.m062x.freq\0,2\C,-0.0679388,0.,-0.4516817856\C,0.9303948151,0.,-1.5982183008\C,-0.9139752974,1.2643279846,-0.4206204322\C,-0.9139752974,-1.2643279846,-0.4206204322\H,1.5658663168,0.888617102,-1.5558735526\H,0.3941520243,0.,-2.5509713803\H,1.5658663168,-0.888617102,-1.5558735526\H,-0.2755946797,2.1517801313,-0.3925740394\H,-1.5626020061,1.2657044176,0.4579228303\H,-1.5359772132,1.309581431,-1.3189705532\H,-1.5359772132,-1.309581431,-1.3189705532\H,-1.5626020061,-1.2657044176,0.4579228303\H,-0.2755946797,-2.1517801313,-0.3925740394\O,0.799493169,0.,0.7429164388\O,0.1260245516,0.,1.8548065224\\Version=ES64L-G16RevC.01\HF=-308.0420259\s2=0.755118\s2-1=0.\s2A=0.750015\RMSD=3.785e-09\RMSF=1.391e-05\Dipole=-0.3785131,0.,-1.154907\Quadrupole=0.3526454,1.4753459,-1.8279913,0.,-0.847758,0.\PG=CS [SG(C2H1O2),X(C2H8)]\@

#### 2OOH.a1b2

1\1\GINC-N1525\FOpt\RM062X\6-31+G(d,p)\C4H10O2\HD\_IL182\19-Apr-2021\0\#\M062X\6-31+G(d,p) SCF=Tight INT(grid=ultrafine) OPT IOP(2/17=4) Nosy



```
mm\2ooh.m062x.freq\0,1\C,-0.0963641207,-0.0060344515,-0.4843244958\C
,0.9612244559,-0.005755741,-1.5831747959\C,-0.9318958566,1.2698009008,
-0.5165365003\C,-0.9700791114,-1.2548845168,-0.5584074557\H,1.61344556
91,0.8657918431,-1.483216836\H,0.4747552845,0.0302053358,-2.5618350143
\H,1.5731493393,-0.9104283592,-1.5289127163\H,-0.2821580326,2.14586220
78,-0.4378889525\H,-1.6406485982,1.2843460464,0.3143864815\H,-1.491162
097,1.3291854374,-1.4551605299\H,-1.5005426002,-1.2856218904,-1.514671
5504\H,-1.7127759357,-1.2563446968,0.2432568381\H,-0.3524992025,-2.155
0955646,-0.4772647781\O,0.7075696844,-0.0300751115,0.7104838645\O,-0.1
557306666,0.00348534,1.8471450223\H,0.0351208881,-0.8546237798,2.25112
54187\Version=ES64L-G16RevC.01\HF=-308.6800467\RMSD=4.303e-09\RMSF=3.
932e-06\Dipole=-0.2703966,-0.5540069,-0.3671236\Quadrupole=-1.4487067,
0.4157486,1.0329581,-0.0937227,-0.2358096,-2.8766713\PG=C01 [X(C4H10O2
)]\@
```

#### TS-2.M062X

```
1\1\GINC-N0721\FTS\UM062X\6-31+G(d,p)\C7H17(2)\HD_IL182\16-Apr-2021\0\
\#UM062X\6-31+G(d,p) SCF=Tight INT(grid=ultrafine) OPT=(TS,calcfc,noei
gentest,maxcyc=250) IOP(2/17=4) Nosymm\TS2.m062x.freq\0,2\C,-0.20707
3949,-0.0342947553,0.5090653565\C,-0.6281792768,-1.4598075901,0.237673
5491\C,-1.1378783107,1.0317413682,-0.0198876347\H,0.0313504116,-2.1785
948796,0.73444654\H,-0.614997913,-1.6863637928,-0.837954415\H,-1.65027
58473,-1.6367367034,0.5927530751\H,-1.225517232,0.9840962396,-1.114804
2512\H,-0.7937971796,2.0368788177,0.2416492135\H,-2.1474373593,0.90257
42582,0.3895388074\C,-0.3755154736,0.2036711064,3.1875922577\C,-0.4734
66044,1.6936158405,3.437899501\C,0.891314695,-0.4231212754,3.729613641
1\C,-1.6351306731,-0.5584800868,3.5400788715\H,0.402652228,2.221108997
9,3.0444364365\H,-0.5310736468,1.9063241751,4.5161907219\H,-1.36736436
07,2.1195786152,2.969506503\H,1.7812641388,0.1017584052,3.365741072\H,
0.9720684335,-1.4755716577,3.4365027448\H,0.9093964881,-0.3834309394,4
.8291951912\H,-1.8383276232,-0.5000111034,4.6203429507\H,-1.5474148279
,-1.6184626722,3.2784547456\H,-2.5081698928,-0.1486927194,3.0195797762
\H,-0.2605204105,0.0937815334,1.8709098127\H,0.8483836255,0.1579888181
,0.2939755332\Version=ES64L-G16RevC.01\HF=-276.7658388\S2=0.758579\S2
-1=0.\S2A=0.75004\RMSD=5.559e-09\RMSF=7.414e-07\Dipole=0.010937,0.0008
637,-0.0140566\Quadrupole=0.1222508,-0.0233496,-0.0989012,0.0398307,-0
.0861632,-0.0342307\PG=C01 [X(C7H17)]\@
```

#### TS-20.a2b3

```
1\1\GINC-N0726\FTS\UM062X\6-31+G(d,p)\C7H17O1(2)\HD_IL182\16-Apr-2021\
0\#UM062X\6-31+G(d,p) SCF=Tight INT(grid=ultrafine) OPT=(TS,calcfc,no
eigentest,maxcyc=250) IOP(2/17=4) Nosymm\TS20.m062x.freq\0,2\C,-1.13
27448658,-1.093290154,1.8724935734\C,-1.2081865157,0.383687669,2.29220
99556\C,-1.9642489808,-1.9568777933,2.823766084\C,-1.6071145076,-1.253
6107323,0.4259462366\H,-0.8320035311,0.505197432,3.311221921\H,-2.247
8917521,0.7238806346,2.2537450547\H,-0.605690834,0.9986117645,1.619003
9659\H,-1.5950486732,-1.845322462,3.8470461913\H,-1.890687023,-3.01211
81148,2.5426261976\H,-3.0203452763,-1.6694312552,2.7944782712\H,-2.637
0237884,-0.9010099916,0.3107451185\H,-1.5750522728,-2.3071440064,0.128
2345235\H,-0.9587423537,-0.683527123,-0.2459123755\O,0.2382485179,-1.3
971668067,1.9876014798\C,0.8717696197,-3.6703246577,1.0628463993\C,-0.
1526303158,-4.7730452966,1.2314433899\C,1.2555138196,-3.3602032042,-0.
3691034833\H,-0.4100117088,-4.9336583781,2.2816877743\H,0.2455099766,-
5.7172294838,0.8370345278\H,-1.0725475929,-4.5536673409,0.6783624879\H
,1.7847037202,-4.2117120123,-0.8161434997\H,1.9101767096,-2.4867492493
,-0.4237316857\H,0.3699874346,-3.1630184587,-0.9818849881\H,0.45586697
63,-2.6169947046,1.5410228997\H,1.7499332175,-3.8244462745,1.698929709
2\Version=ES64L-G16RevC.01\HF=-351.9661435\S2=0.75941\S2-1=0.\S2A=0.7
5004\RMSD=2.249e-09\RMSF=2.483e-06\Dipole=-0.3992758,-0.3645724,-0.265
827\Quadrupole=-0.3320625,3.3711144,-3.0390519,-0.5419263,-1.9664272,0
.1997586\PG=C01 [X(C7H17O1)]\@
```

TS-200.alb3

```
1\1\GINC-N1608\FTS\UM062X\6-31+G(d,p)\C7H17O2(2)\HD_IL182\16-Apr-2021\
0\#\UM062X\6-31+G(d,p) SCF=Tight INT(grid=ultrafine) OPT=(TS,calcfc,no
eigentest,maxcyc=250) IOP(2/17=4) Nosymm\TS200.m062x.freq\0,2\C,-0.1
40858476,-0.696987602,0.0395060845\C,0.4726425513,-1.9072665063,-0.655
6350167\C,-0.7991742533,0.2439632833,-0.9619735453\C,-1.1115639999,-1.
1159894886,1.1389075361\H,1.182843282,-1.5866570993,-1.4246823749\H,-0
.3124726772,-2.4977432586,-1.1371527812\H,0.9906336199,-2.544817423,0.
0656262605\H,-0.0780125802,0.5605813145,-1.7211780429\H,-1.1836696159,
1.132107118,-0.4534310568\H,-1.6310842189,-0.2638056985,-1.4579476212\
H,-1.9378465562,-1.693730004,0.7137377454\H,-1.5196255116,-0.231595870
7,1.6361733497\H,-0.5986124587,-1.7300705674,1.8827232713\O,0.89769856
1,0.1302834639,0.6132983159\O,1.6196911633,-0.5807760516,1.5583306084\
C,3.8325006224,-0.9374171382,0.4072224439\C,3.7711683036,0.1312485266,
-0.6534849149\C,4.0296097362,-2.3561607742,-0.0647378678\H,3.022972633
7,-0.1110095092,-1.4155090559\H,4.7423738072,0.2226528118,-1.160787916
5\H,3.5151997181,1.1047585818,-0.2282037868\H,3.3270492824,-2.61180771
97,-0.8636091387\H,3.9082390319,-3.0772069411,0.7483556055\H,5.0439341
595,-2.4818746189,-0.4696045047\H,2.6445727558,-0.8403459724,1.0121275
119\H,4.4618211195,-0.6699428562,1.2616288911\Version=ES64L-G16RevC.0
1\HF=-427.0850288\S2=0.759754\S2-1=0.\S2A=0.750048\RMSD=6.729e-09\RMSF
=4.041e-06\Dipole=0.1153613,-0.4768453,-0.6967255\Quadrupole=4.4107031
,-0.7494791,-3.661224,-1.5263038,-1.1910483,0.0022387\PG=C01 [X(C7H17O
2)]\@
```

### *Cis-pent-2-ene*

5.M062X

```
1\1\GINC-R37\FOpt\UM062X\6-31+G(d,p)\C5H9(2)\ROOT\09-May-2018\0\#\ M06
2X\6-31+G** SCF=Tight INT(grid=ultrafine) OPT IOP(2/17=4) maxdisk=6710
88640\5.M062X\0,2\C,1.4943591788,5.9875319483,-0.8287535531\C,1.1465
271703,4.7743825845,-1.6339915567\C,0.9923244583,3.5060361984,-1.07980
69219\C,1.1347474666,3.1955140869,0.2587514456\C,0.9608170827,1.819961
7233,0.8173283917\H,1.5714286355,6.8761754487,-1.4576077415\H,2.451965
4726,5.8608286826,-0.3070565258\H,0.7388177149,6.1863784828,-0.0573890
046\H,1.0068644361,4.8895907148,-2.7038094564\H,0.7380854954,2.6914762
79,-1.7579728059\H,1.3880834765,3.9872768137,0.9610440283\H,0.16482385
17,1.7915989351,1.571372288\H,1.874460355,1.4707389657,1.3135985345\H,
0.7078252057,1.1034491362,0.0310128778\Version=ES64L-G09RevE.01\State
=2-A\HF=-195.7977532\S2=0.77929\S2-1=0.\S2A=0.750195\RMSD=3.395e-09\RM
SF=3.223e-05\Dipole=0.0199084,0.0175719,0.1143708\Quadrupole=-2.028581
5,1.1464364,0.8821451,0.5579966,0.3801833,-0.4368906\PG=C01 [X(C5H9)]\
@
```

5h.M062X

```
1\1\GINC-R42\FOpt\RM062X\6-31+G(d,p)\C5H10\ROOT\09-May-2018\0\#\ M062X
/6-31+G** SCF=Tight INT(grid=ultrafine) OPT IOP(2/17=4) maxdisk=671088
640\5h.M062X\0,1\C,1.5554316892,5.8535490298,-0.7279229827\C,1.09659
28502,4.5502583657,-1.3281775236\C,1.165249104,3.3801611927,-0.6879006
891\C,1.7072508502,3.2117497994,0.7098414025\C,1.6649938493,1.76222564
04,1.1906610375\H,1.4117423844,6.6877872982,-1.4168675072\H,2.61882408
47,5.815985924,-0.4634666444\H,1.0066185261,6.0809474988,0.1936222288\
H,0.6894947098,4.5734240688,-2.3363575932\H,0.8119982465,2.4807943599,
-1.1919654468\H,1.138155246,3.8479851671,1.4016758832\H,2.7400519786,3
.5847178196,0.7487885925\H,0.6378998321,1.3839555393,1.1926810729\H,2.
0621849858,1.6651319001,2.2043441109\H,2.25675804,1.1179006197,0.53288
07701\Version=ES64L-G09RevE.01\State=1-A'\HF=-196.4374243\RMSD=3.693e
-09\RMSF=1.617e-05\Dipole=0.0593501,0.0769389,0.1145943\Quadrupole=-0.
9183326,0.6610571,0.2572755,0.1699432,0.525658,-0.3175531\PG=CS [SG(C5
H4),X(H6)]\@
```

5o.M062X

```
1\1\GINC-R38\FOpt\UM062X\6-31+G(d,p)\C5H9O1(2)\ROOT\09-May-2018\0\#\# M
062X/6-31+G** SCF=Tight INT(grid=ultrafine) OPT IOP(2/17=4) maxdisk=67
1088640\5o.M062X\0,2\C,1.5670612588,5.9898387241,-0.8879831078\C,1.1
675903853,4.7287865126,-1.5914492649\C,1.0966148369,3.5093658716,-1.05
04320117\C,1.4079114779,3.2068963189,0.4127578206\C,0.8638063742,1.846
8917111,0.8363720957\H,0.7624594474,6.7312108267,-0.935227997\H,2.4385
696547,6.4302928261,-1.3830428055\H,1.834798113,5.8136203959,0.1549579
227\H,0.9161446262,4.8261509763,-2.6469913539\H,0.8551603421,2.6469467
427,-1.6671824821\H,0.9891196394,4.0046005594,1.0465716608\O,2.7908804
236,3.2444579245,0.4260950479\H,-0.2285591413,1.8421731913,0.772490540
6\H,1.1533721082,1.6246576171,1.8660816546\H,1.2656204536,1.0656398016
,0.1852122798\Version=ES64L-G09RevE.01\State=2-A\HF=-270.9623839\S2=0
.754981\S2-1=0.\S2A=0.750018\RMSD=6.655e-09\RMSF=1.371e-05\Dipole=-0.7
915026,0.234292,-0.2118708\Quadrupole=-3.6157347,2.0196012,1.5961335,1
.2046422,-0.7337504,-0.9231922\PG=C01 [X(C5H9O1)]\@
```

5oh.M062X

```
1\1\GINC-R37\FOpt\RM062X\6-31+G(d,p)\C5H10O1\ROOT\09-May-2018\0\#\# M06
2X/6-31+G** SCF=Tight INT(grid=ultrafine) OPT IOP(2/17=4) maxdisk=6710
88640\5oh.M062X\0,1\C,1.657453985,5.9611847996,-0.9313917678\C,1.094
0957901,4.7394327567,-1.5957857505\C,0.9294627475,3.5442736114,-1.0207
367149\C,1.3158000761,3.21925046,0.4080766747\C,0.9095840441,1.8009098
106,0.7886139269\H,0.9496691029,6.7940029185,-1.0015059097\H,2.5758651
583,6.2805666988,-1.4361686301\H,1.9017324709,5.7805122405,0.116373310
9\H,0.7956650586,4.8521652197,-2.6375236682\H,0.5003076888,2.732371467
3,-1.6072060248\H,0.8239594948,3.9243731823,1.0892052738\O,2.708798584
,3.4259847375,0.6420808604\H,-0.1733042822,1.6693877558,0.6981260741\H
,1.2087295972,1.5868271318,1.816741641\H,1.3971751334,1.0751757224,0.1
273269424\H,3.1995853505,3.0245614871,-0.0852062384\Version=ES64L-G09
RevE.01\State=1-A\HF=-271.6352642\RMSD=6.370e-09\RMSF=1.510e-05\Dipole
=-0.2493376,-0.1329456,-0.5236556\Quadrupole=-0.8305105,1.5408962,-0.7
103857,-0.3627775,-2.1318613,-0.3534716\PG=C01 [X(C5H10O1)]\@
```

5oo.a3

```
1\1\GINC-R39\FOpt\UM062X\6-31+G(d,p)\C5H9O2(2)\ROOT\08-May-2018\0\#\#M0
62X/6-31+G** SCF=Tight IOP(2/17=4) INT(grid=ultrafine) OPT maxdisk=671
088640\5oo.a3\0,2\C,1.3018049857,6.0885218056,-0.8799598342\C,1.13746229
22,4.7780734225,-1.5885675217\C,1.203161796,3.5499597561,-1.0664919986
\C,1.447759392,3.226831095,0.3764653357\C,0.7575498884,1.9557801162,0.
8316063931\H,0.4337153698,6.7318915801,-1.0565708794\H,2.1781142273,6.
6113907926,-1.2772474239\H,1.451606208,5.9765202677,0.1939735516\H,0.9
592302468,4.8492663604,-2.661150183\H,1.0924765553,2.6899640787,-1.725
2024496\H,1.201183195,4.068459369,1.0282644565\O,2.8811799079,2.977896
4433,0.593213098\H,-0.3241443646,2.0726666055,0.7312179997\H,0.9948117
286,1.7358256559,1.874701919\H,1.0732890989,1.1106493608,0.2132458471\
O,3.5806124727,4.0668652904,0.4731196895\Version=ES64L-G09RevE.01\Sta
te=2-A\HF=-346.1010742\S2=0.755157\S2-1=0.\S2A=0.750016\RMSD=4.177e-09
\RMSF=2.430e-06\Dipole=-1.1232979,0.0202637,-0.1857241\Quadrupole=-4.1
468705,2.3855442,1.7613263,0.629845,-1.4291947,-0.8828909\PG=C01 [X(C5
H9O2)]\@
```

5ooh.a3

```
1\1\GINC-R47\FOpt\RM062X\6-31+G(d,p)\C5H10O2\ROOT\08-May-2018\0\#\#M062
X/6-31+G** SCF=Tight IOP(2/17=4) INT(grid=ultrafine) OPT maxdisk=67108
8640\5ooh.a3\0,1\C,1.0588497961,6.0942683656,-0.8731782909\C,1.0744543174
,4.7561029666,-1.5538862484\C,1.29026855,3.561167459,-0.9934052819\C,1
.5792980254,3.2940211812,0.459875682\C,0.9219254594,2.0142741089,0.950
5211881\H,1.7445746436,6.7804525372,-1.3811446442\H,1.3600126646,6.038
1112057,0.1731305271\H,0.061241426,6.5429364398,-0.9322477991\H,0.8843
```

065771, 4.7767440276, -2.6269626987\H, 1.2859138542, 2.677113745, -1.631551  
4976\H, 1.2817134881, 4.1398674407, 1.0888057773\O, 2.9839533594, 3.0794367  
133, 0.6564540219\H, -0.1634431963, 2.0967873978, 0.8531554022\H, 1.1742703  
768, 1.8330508632, 1.997410736\H, 1.2608985135, 1.1614754536, 0.3550386596\  
O, 3.6461019036, 4.316758541, 0.4358090947\H, 3.8410202412, 4.2789635538, -0  
.5139386281\\Version=ES64L-G09RevE.01\State=1-A\HF=-346.7420759\RMSD=7  
.992e-09\RMSF=6.696e-06\Dipole=-0.6793023, 0.2069437, -0.7128972\Quadrup  
ole=-1.9042534, 1.1993768, 0.7048766, 0.7342867, -3.4549006, -1.0003513\PG=  
C01 [X(C5H10O2)]\@

TS-5-u.a2

1\1\GINC-R52\FTS\UM062X\6-31+G(d,p)\C10H19(2)\ROOT\10-May-2018\0\#\#M06  
2X/6-31+G\*\* SCF=Tight IOP(2/17=4) INT(grid=ultrafine) OPT(TS,calcf,ma  
xstep=15,noeigentest,maxcyc=200) maxdisk=1073741824\\a2\0,2\C,3.65217  
12966, 1.1237192929, 0.9477959673\C, 3.0773929801, 1.9698430149, 2.04512780  
35\C, 2.526194951, 3.1923904606, 1.8986172686\C, 2.4075824219, 3.9535109533  
, 0.6576543914\C, 1.4975927392, 5.1609494392, 0.6507900616\H, 3.1482417724,  
0.152025031, 0.8949124218\H, 4.7132527626, 0.9195197363, 1.132548182\H, 3.5  
713053073, 1.6012355799, -0.0311620213\H, 3.1196534288, 1.5473687205, 3.047  
075708\H, 2.1797906062, 3.6988763088, 2.8006190496\H, 2.3497040931, 3.35693  
93873, -0.2563209853\H, 0.4409942651, 4.8724390334, 0.5970898507\H, 1.71151  
45015, 5.8041186546, -0.209641606\H, 1.6340618958, 5.7552127896, 1.56077146  
93\H, 3.6151099001, 4.5044683401, 0.4462126041\C, 5.182364363, 3.764358498,  
-2.4990472403\C, 4.8652760778, 5.2074012123, -2.2392008688\C, 4.7169475273  
, 5.7815473623, -1.0274805155\C, 4.7991601817, 5.1157128495, 0.2699141665\C  
, 4.9015359846, 5.9809819679, 1.5055699237\H, 6.1043738837, 3.6627564274, -3  
.0825790648\H, 4.3845611159, 3.2926022003, -3.0844348105\H, 5.3003197223, 3  
.1919132973, -1.5763776212\H, 4.742191481, 5.8361244966, -3.1188180174\H, 4  
.4534655788, 6.8398682811, -1.0016476136\H, 5.435848984, 4.2279730106, 0.30  
35411988\H, 5.9105072948, 6.3918885975, 1.6307246087\H, 4.6628717447, 5.403  
7074467, 2.4053186968\H, 4.2041621388, 6.8237366102, 1.4483319923\\Version  
=ES64L-G09RevE.01\State=2-A\HF=-392.2086261\S2=0.771697\S2-1=0.\S2A=0.  
750356\RMSD=6.136e-09\RMSF=1.655e-06\Dipole=0.0367775, -0.0941301, -0.05  
5884\Quadrupole=-1.982113, 0.9178131, 1.0642999, -1.8002656, 0.383032, 0.73  
77372\PG=C01 [X(C10H19)]\@

TS-5o-u.a2b2

1\1\GINC-R45\FTS\UM062X\6-31+G(d,p)\C10H19O1(2)\ROOT\09-May-2018\0\#\#M  
062X/6-31+G\*\* SCF=Tight IOP(2/17=4) INT(grid=ultrafine) OPT(TS,calcf,ma  
noeigentest,maxcyc=200) maxdisk=1073741824\\a2 b2\0,2\C,0.2066579811,  
5.7557628313, 0.121825624\C, 1.0530913838, 5.0470082238, -0.8915487805\C, 1  
.9790454258, 4.1212090167, -0.6310256486\C, 2.3280651927, 3.6113462996, 0.7  
587074331\C, 3.0932930035, 2.2947243764, 0.6830885775\H, -0.8585980384, 5.6  
060906136, -0.0846909866\H, 0.3950642978, 6.8337288629, 0.0789721654\H, 0.4  
255235695, 5.4233035338, 1.137738843\H, 0.8980993964, 5.3316202236, -1.9316  
877878\H, 2.5747569877, 3.7122534827, -1.445054676\H, 1.4002206218, 3.46726  
46157, 1.3389785088\O, 3.0932506754, 4.6421991516, 1.324393224\H, 2.4996051  
06, 1.5341124675, 0.1662463148\H, 3.3248092612, 1.9251905855, 1.6857293216\  
H, 4.0313964224, 2.4449279694, 0.1395895981\H, 3.3921996037, 4.2386187705, 2  
.6139761939\C, 0.5622111767, 4.4847756598, 3.9082277191\C, 1.2019529378, 3.  
153859905, 4.176021889\C, 2.519059583, 2.9071330963, 4.103754786\C, 3.55833  
21393, 3.9102623283, 3.7551767915\C, 4.9923042262, 3.4265285567, 3.87743800  
97\H, 0.2464793371, 4.9637050413, 4.8429859946\H, -0.3375742751, 4.36298688  
99, 3.2959642116\H, 1.2412898005, 5.1642542586, 3.3854591209\H, 0.537070171  
, 2.3363728315, 4.4488327446\H, 2.8652656501, 1.8891704817, 4.2868469968\H,  
3.4006501323, 4.867480987, 4.2642666645\H, 5.2370220133, 3.1965714862, 4.92  
10829627\H, 5.6948258833, 4.1835321907, 3.521819666\H, 5.1493383341, 2.5167  
772626, 3.289024518\\Version=ES64L-G09RevE.01\State=2-A\HF=-467.3971839  
\S2=0.761834\S2-1=0.\S2A=0.750089\RMSD=8.647e-09\RMSF=1.004e-06\Dipole  
=-0.4556531, -0.3131089, 0.2379299\Quadrupole=0.2765244, -1.0631544, 0.786  
63, -2.4615282, 1.2266629, 0.0098495\PG=C01 [X(C10H19O1)]\@

```

TS-500-u.a2b3
1\1\GINC-R74\FTS\UM062X\6-31+G(d,p)\C10H19O2(2)\ROOT\09-May-2018\0\#\#M
062X/6-31+G** SCF=Tight IOP(2/17=4) INT(grid=ultrafine) OPT(TS,calcfc,
noeigentest,maxcyc=200) maxdisk=1610612736\#a2 b3 c1\#0,2\C,-0.6023456
57,5.4256654527,-0.1439103694\C,0.7406443419,5.2564832251,-0.792899443
7\C,1.7450373231,4.4722117303,-0.39341432\C,1.7503734707,3.5511975109,
0.7909857687\C,1.825897366,2.0856669827,0.3826111056\H,-1.3958972295,5
.0503786718,-0.7993510568\H,-0.8106184285,6.4871340608,0.0287671589\H,
-0.6779719901,4.9048979069,0.8123301322\H,0.8960014381,5.8410120589,-1
.6989200899\H,2.6642779266,4.4543171704,-0.9785523019\H,0.8865800068,3
.7223224559,1.4431652529\O,2.9256798153,3.9201253276,1.5384986251\H,0.
91550832,1.8006384222,-0.1517493924\H,1.9349868071,1.4574458382,1.2692
416811\H,2.6844869154,1.9227500875,-0.2756537724\O,2.9439071636,3.2408
467962,2.7300069744\H,2.3985870492,4.0647247119,3.5188816627\C,3.23175
20882,6.9336741447,2.1805506095\C,1.7665183565,6.6781422011,2.34394255
71\C,1.1935186522,5.8475256366,3.2395465524\C,1.8956802253,5.018702743
4,4.2208514021\C,1.0505088405,4.3616280285,5.292545454\H,3.5301050569,
6.7059446088,1.1515963454\H,3.83904144,6.3118039844,2.8400190339\H,3.4
659399679,7.9882993931,2.3658294907\H,1.1098070737,7.2111042736,1.6576
464428\H,0.1090002825,5.729348127,3.199620488\H,2.8221278677,5.4576256
086,4.6004990112\H,0.6544159373,5.1086255034,5.9912926816\H,1.63191198
4,3.6386275277,5.8697513005\H,0.1992105886,3.8355168089,4.8489490156\
Version=ES64L-G09RevE.01\State=2-A\HF=-542.520514\S2=0.766769\S2-1=0.\
S2A=0.750175\RMSD=8.505e-09\RMSF=2.575e-06\Dipole=-0.8574518,0.5009934
,-0.2643914\Quadrupole=-1.3988261,-1.326024,2.7248501,2.0307703,0.2498
722,-0.4424081\PG=C01 [X(C10H19O2)]\@

```

## S2. Details of kinetic Monte Carlo (*k*MC) modelling framework

### S2.1. Representation of population of macromolecules using bivariate binary tree structures

As mentioned in the main text, each population considered in the kinetic Monte Carlo (*k*MC) model is tracked by two distribution variables, being (i) the carbon number of the polymer backbone (CN) and (ii) the number of defects (*e.g.* allylic, tertiary or quaternary carbon atoms; in main text only example with allylic (poly(butadiene)) and quaternary (poly(isobutylene)) carbon atoms). To store all this information for every population type, bivariate binary trees are used. An example is given below, considering the population  $P_i$  with 6 species (CN = 4; note that the primary C atoms at chain ends are not considered in CN calculation and thus also not shown) as defined in Figure S1a (pol(ethylene) with tertiary defects; green: secondary hydrogen (H) atoms; orange: tertiary H atoms). The representation of the population  $P_i$  in a bivariate tree is shown in Figure S1b on the left. A schematic representation of the relation with the distribution of the population is shown in Figure S1b on the right.

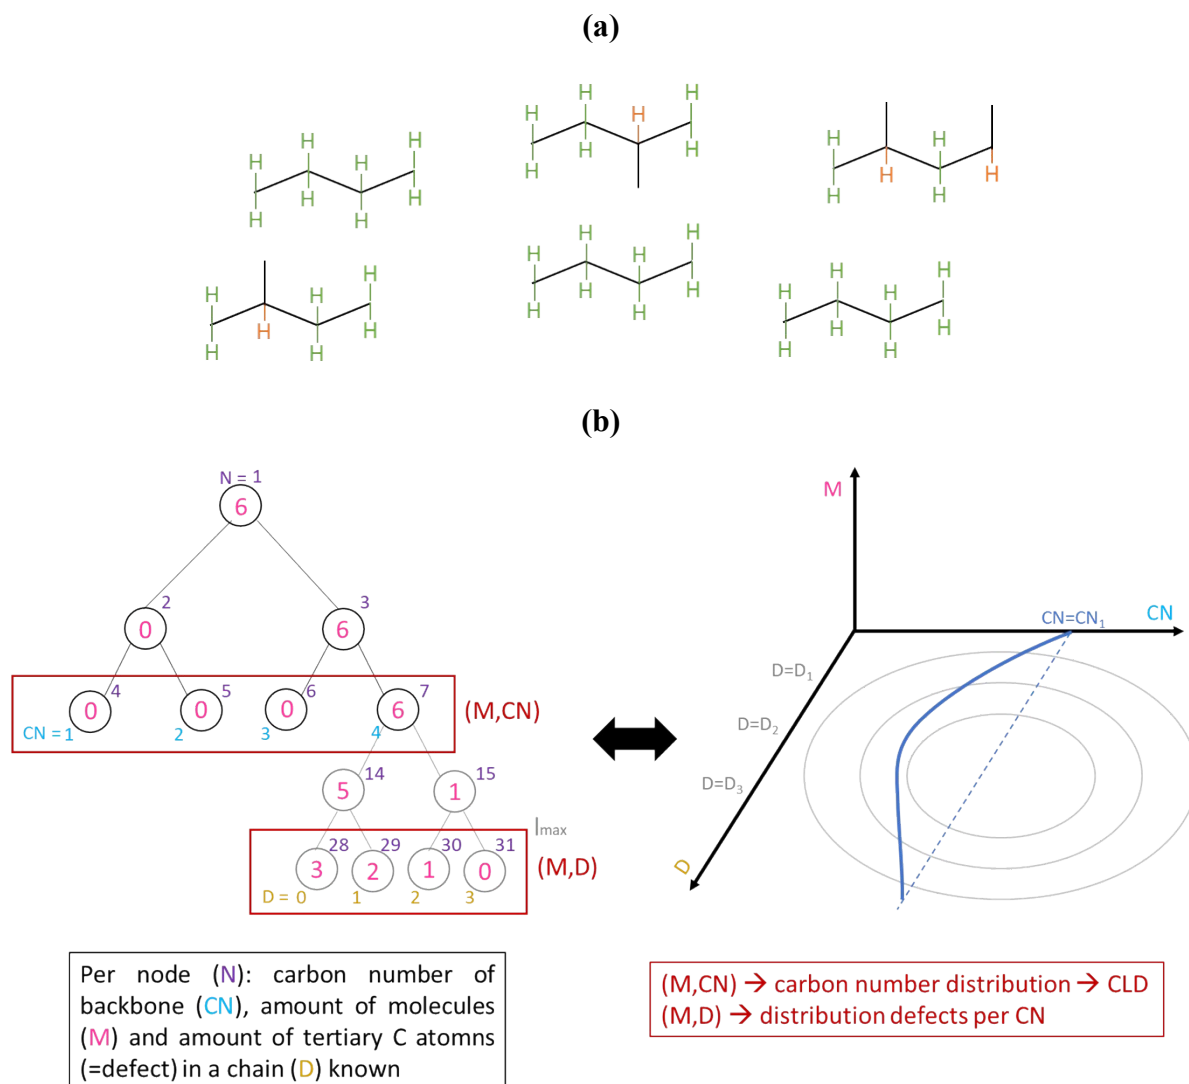

**Figure S1.** (a) Population  $P_i$  (poly(ethylene) with tertiary defects) consisting of 6 species with  $CN = 4$ ; secondary H atoms are shown in green and tertiary in orange and (b) representation of population  $P_i$  in bivariate binary tree (left) and relation with the distribution of population  $P_i$  (right).

### S2.2. Example of the use of mass-weighted binary trees

As the hydrogen abstraction reaction involves macromolecules with multiple reactive centres, mass-weighted binary trees are used additionally to the number-weighted tree as shown in Figure S2b on the left, to properly calculate its total reaction probability and to properly select the specific reaction partners to undergo the reaction. This is necessary because larger macromolecules have a larger probability to undergo hydrogen abstraction compared to smaller molecules, as was also explained in the main text. In Figure S2, related to the example defined in Figure S1, it is shown how mass-weighted trees (right part of Figure S2) are constructed starting from the corresponding number-weighted tree (left part of Figure S2; taken from Figure

S1) and how their information is used to calculate the reaction rate for hydrogen abstraction of tertiary H atoms ( $r_{abstertH}$  (mol L<sup>-1</sup> s<sup>-1</sup>); top of right part of Figure S2; with  $k_{absH}$  (L mol<sup>-1</sup> s<sup>-1</sup>) the single-event rate coefficient for H abstraction reaction,  $n_{H,tertC}$  the number of H atoms per tertiary C atom,  $n_{tertC}$  the total number of tertiary C atom,  $V$  the volume (L) and  $N_{Av}$  the constant of Avogadro (mol<sup>-1</sup>)) and for hydrogen abstraction of secondary H atoms ( $r_{abssecH}$  (mol L<sup>-1</sup> s<sup>-1</sup>); bottom of right part of Figure S2; with  $k_{absH}$  (L mol<sup>-1</sup> s<sup>-1</sup>) the single-event rate coefficient for H abstraction reaction,  $n_{H,secC}$  the number of H atoms per secondary C atom,  $n_{secC}$  the total number of secondary C atom,  $V$  the volume (L) and  $N_{Av}$  the constant of Avogadro (mol<sup>-1</sup>)).

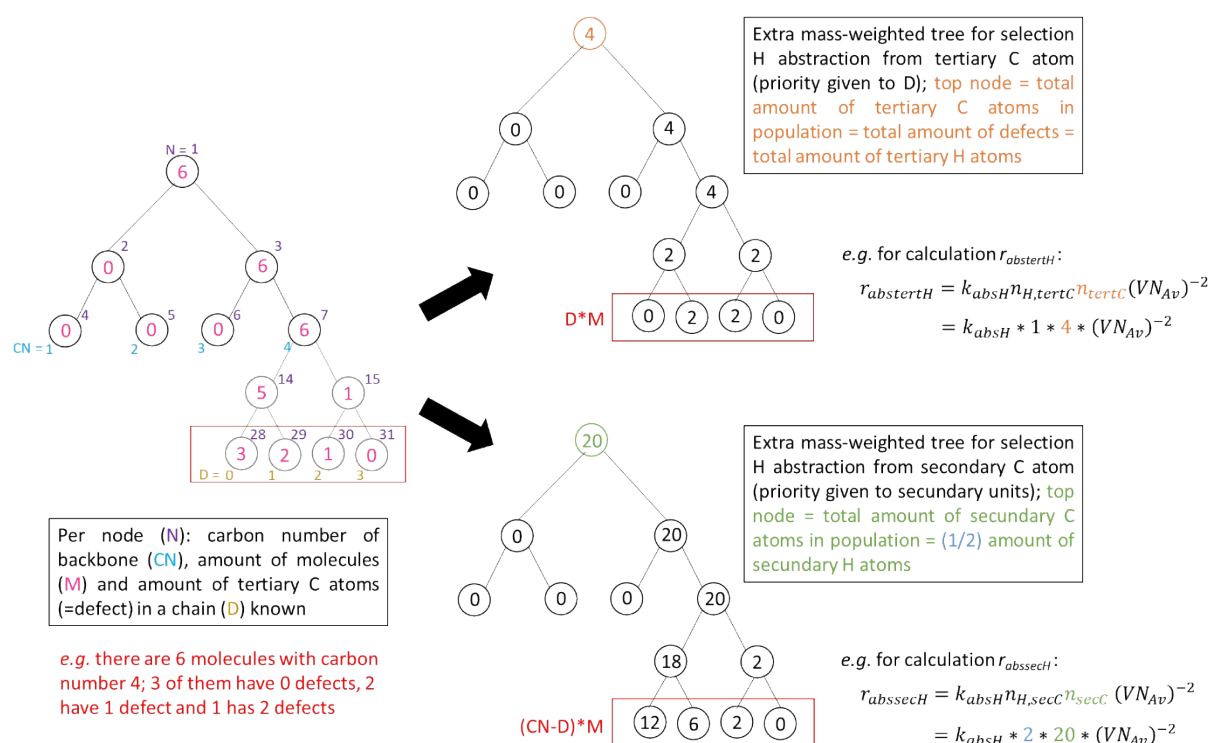

**Figure S2.** Construction of mass-weighted bivariate trees (right) based on the corresponding number-weighted bivariate tree (left; taken from Figure S1) and calculation of reaction rate for hydrogen abstraction of tertiary H atoms ( $r_{abstertH}$  (mol L<sup>-1</sup> s<sup>-1</sup>) with  $k_{absH}$  (L mol<sup>-1</sup> s<sup>-1</sup>) the single-event rate coefficient for H abstraction reaction,  $n_{H,tertC}$  the number of H atoms per tertiary carbon (C) atom,  $n_{tertC}$  the total number of tertiary C atom,  $V$  the volume (L) and  $N_{Av}$  the constant of Avogadro (mol<sup>-1</sup>), and for hydrogen abstraction of secondary H atoms ( $r_{abssecH}$  (mol L<sup>-1</sup> s<sup>-1</sup>) with  $k_{absH}$  (L mol<sup>-1</sup> s<sup>-1</sup>) the single-event rate coefficient for H abstraction reaction,  $n_{H,secC}$  the number of H atoms per secondary C atom,  $n_{secC}$  the total number of secondary C atom,  $V$  the volume (L) and  $N_{Av}$  the Avogadro number (mol<sup>-1</sup>)).

### S3. Model parameters for autoxidation simulations

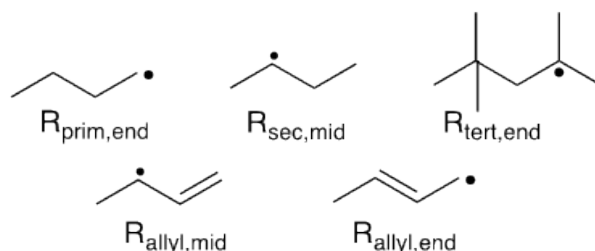

**Figure S3.** Representation of radical types considered in *k*MC model, a differentiation is made according to their endgroup; see Table S4 to S6 for reaction schemes.

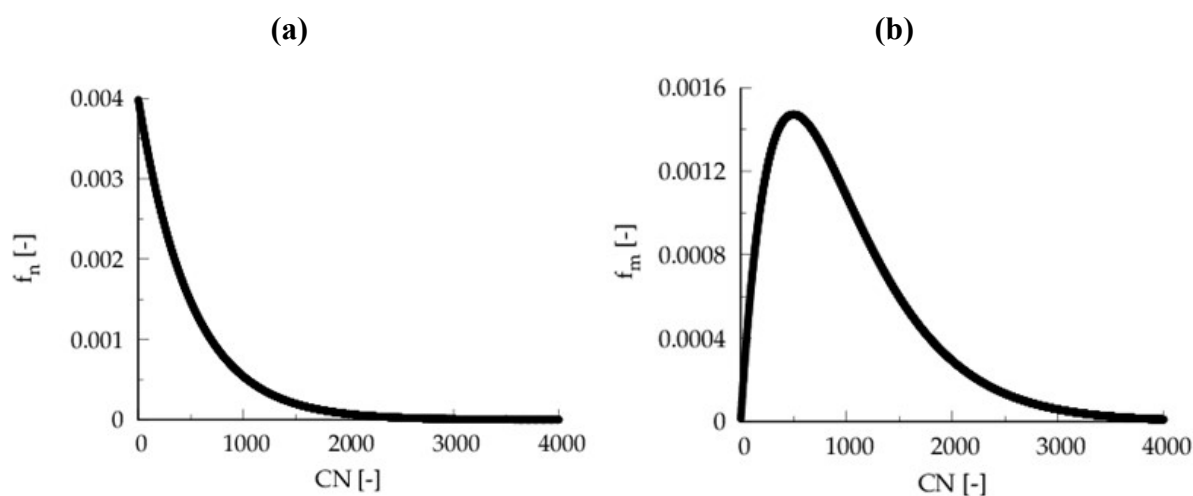

**Figure S4.** Chain length distribution (CLD) of initial polymer: **(a)** on number fraction basis  $f_{n,CN}$  and **(b)** on mass fraction basis  $f_{m,CN}$ ; expressed in carbon number (CN) instead of chain length  $i$  (see Figure 1 in main text; example shown for poly(ethylene) and poly(isobutylene) for which  $CN = 2*i$ ).

**Table S4.** Reaction mechanism for the autoxidation of poly(butadiene); also given are the rate coefficients ( $(L mol^{-1}) s^{-1}$ ) at 298 K; P = dead polymer chain,  $R^*$  = polymer alkyl radical;  $RO^*$  = polymer alkoxy radical;  $RO_2^*$  = polymer alkyl peroxy radical; endgroups according to Figure S3;  $i$  and  $j$  represent carbon number; no reactions with  $C_{//}$  accounted for in model.

| Reaction           | Reaction Equation                                                                                        | $k_f$ ( $(L mol^{-1}) s^{-1}$ ) | $k_r$ ( $(L mol^{-1}) s^{-1}$ ) | Ref  |
|--------------------|----------------------------------------------------------------------------------------------------------|---------------------------------|---------------------------------|------|
| <b>Initiation</b>  | $P_i \rightleftharpoons R_{allyl,end,j} + R_{allyl,end,i-j}$                                             | $1.0 \cdot 10^{-10}$            | $1.2 \cdot 10^2$                | a, b |
| <b>Propagation</b> | $R_{allyl,end,i} + O_2 \rightleftharpoons R_{allyl,end,i}O_2^*$                                          | $4.0 \cdot 10^6$                | 0.0                             | 1    |
|                    | $R_{allyl,mid,i} + O_2 \rightleftharpoons R_{allyl,mid,i}O_2^*$                                          | $4.0 \cdot 10^6$                | 0.0                             | 1    |
|                    | $R_{allyl,end,i}O_2^* + R_{allyl,end,j}O_2^* \rightleftharpoons R_{allyl,end,i}O^* + R_{allyl,end,j}O^*$ | 0.0                             | 0.0                             | 2    |
|                    | $R_{allyl,end,i}O_2^* + R_{allyl,mid,j}O_2^* \rightleftharpoons R_{allyl,end,i}O^* + R_{allyl,mid,j}O^*$ | 0.0                             | 0.0                             | 2    |
|                    | $R_{allyl,mid,i}O_2^* + R_{allyl,mid,j}O_2^* \rightleftharpoons R_{allyl,mid,i}O^* + R_{allyl,mid,j}O^*$ | 0.0                             | 0.0                             | 2    |
| <b>H-</b>          | $R_{allyl,end,i}O_2^* + P_{allylH,j} \rightleftharpoons R_{allyl,end,i}OOH + R_{allyl,mid,j}$            | $9.0 \cdot 10^{-2}$             | $1.1 \cdot 10^{-4}$             | c    |



|                                 |                                                                                                                            |                       |                       |   |
|---------------------------------|----------------------------------------------------------------------------------------------------------------------------|-----------------------|-----------------------|---|
| <b>abstraction</b>              | $R_{allyl,mid,i}O_2^* + P_{allylH,j} \rightleftharpoons R_{allyl,mid,i}OOH + R_{allyl,mid,j}$                              | 9.0 10 <sup>-2</sup>  | 1.1 10 <sup>-4</sup>  | c |
|                                 | $R_{allyl,end,i} + P_{allylH,j} \rightleftharpoons P_i + R_{allyl,mid,j}$                                                  | 9.6 10 <sup>-6</sup>  | 9.6 10 <sup>-6</sup>  | c |
|                                 | $R_{allyl,mid,i} + P_{allylH,j} \rightleftharpoons P_i + R_{allyl,mid,j}$                                                  | 9.6 10 <sup>-6</sup>  | 9.6 10 <sup>-6</sup>  | c |
|                                 | $R_{allyl,end,i}O^* + P_{allylH,j} \rightleftharpoons R_{allyl,end,i}OH + R_{allyl,mid,j}$                                 | 3.4 10 <sup>5</sup>   | 3.5 10 <sup>-12</sup> | c |
|                                 | $R_{allyl,mid,i}O^* + P_{allylH,j} \rightleftharpoons R_{allyl,mid,i}OH + R_{allyl,mid,j}$                                 | 3.4 10 <sup>5</sup>   | 3.5 10 <sup>-12</sup> | c |
| <b>β-scission</b>               | $R_{allyl,mid,i} \rightleftharpoons P_j + R_{allyl,end,i-j}$                                                               | 6.8 10 <sup>-14</sup> | 0.0                   | 3 |
| <b>Termination</b> <sup>d</sup> | $R_{allyl,end,i}O_2^* + R_{allyl,end,j} \rightleftharpoons R_{allyl,end,i}OOR_{allyl,end,j}$                               | 1.2 10 <sup>2</sup>   | 0.0                   | b |
|                                 | $R_{allyl,end,i}O_2^* + R_{allyl,mid,j} \rightleftharpoons R_{allyl,end,i}OOR_{allyl,mid,j}$                               | 1.2 10 <sup>2</sup>   | 0.0                   | b |
|                                 | $R_{allyl,mid,i}O_2^* + R_{allyl,end,j} \rightleftharpoons R_{allyl,mid,i}OOR_{allyl,end,j}$                               | 1.2 10 <sup>2</sup>   | 0.0                   | b |
|                                 | $R_{allyl,mid,i}O_2^* + R_{allyl,mid,j} \rightleftharpoons R_{allyl,mid,i}OOR_{allyl,mid,j}$                               | 1.2 10 <sup>2</sup>   | 0.0                   | b |
|                                 | $R_{allyl,end,i}O_2^* + R_{allyl,end,j}O_2^* \rightleftharpoons R_{allyl,end,i}C(O)H + R_{allyl,end,j}O_2^*$               | 6.4 10 <sup>6</sup>   | 0.0                   | 4 |
|                                 | $R_{allyl,end,i}O_2^* + R_{allyl,mid,j}O_2^* \rightleftharpoons R_{allyl,end,i}C(O)H + R_{allyl,mid,j}O_2^*$               | 6.4 10 <sup>6</sup>   | 0.0                   | 4 |
|                                 | $R_{allyl,mid,i}O_2^* + R_{allyl,end,j}O_2^* \rightleftharpoons R_{allyl,mid,i}C(O)R_{allyl,end,j} + R_{allyl,end,j}O_2^*$ | 6.4 10 <sup>6</sup>   | 0.0                   | 4 |
|                                 | $R_{allyl,mid,i}O_2^* + R_{allyl,mid,j}O_2^* \rightleftharpoons R_{allyl,mid,i}C(O)R_{allyl,mid,j} + R_{allyl,mid,j}O_2^*$ | 6.4 10 <sup>6</sup>   | 0.0                   | 4 |
| <b>Re-initiation</b>            | $R_{allyl,end,i}OOR_{allyl,end,j} \rightleftharpoons R_{allyl,end,i}O^* + R_{allyl,end,j}O^*$                              | 2.6 10 <sup>-11</sup> | 0.0                   | 5 |
|                                 | $R_{allyl,end,i}OOR_{allyl,mid,j} \rightleftharpoons R_{allyl,end,i}O^* + R_{allyl,mid,j}O^*$                              | 2.6 10 <sup>-11</sup> | 0.0                   | 5 |
|                                 | $R_{allyl,mid,i}OOR_{allyl,mid,j} \rightleftharpoons R_{allyl,mid,i}O^* + R_{allyl,mid,j}O^*$                              | 2.6 10 <sup>-11</sup> | 0.0                   | 5 |

<sup>a</sup>Forward rate coefficient: value chosen to reach realistic timescales (approximately one month is required to reduce the average chain length by a factor two); <sup>b</sup>Reverse rate coefficient: calculated using diffusion coefficient from Roland *et al.*<sup>6</sup> and Smoluchowski relationship ( $r = 4.7 \cdot 10^{-10}$  m); <sup>c</sup>Calculated in this work; see Table S1.

**Table S5.** Reaction mechanism for the autoxidation of poly(ethylene); also given are the rate coefficients ((L mol<sup>-1</sup>) s<sup>-1</sup>) at 298 K; P = dead polymer chain, R\* = polymer alkyl radical; RO\* = polymer alkoxy radical; RO<sub>2</sub>\* = polymer alkyl peroxy radical; endgroups according to Figure S3; *i* and *j* represent carbon number.

| Reaction             | Reaction Equation                                                                                                              | $k_f$ ((L mol <sup>-1</sup> ) s <sup>-1</sup> ) | $k_r$ ((L mol <sup>-1</sup> ) s <sup>-1</sup> ) | Ref  |
|----------------------|--------------------------------------------------------------------------------------------------------------------------------|-------------------------------------------------|-------------------------------------------------|------|
| <b>Initiation</b>    | $P_i \rightleftharpoons R_{prim,end,j} + R_{prim,end,i-j}$                                                                     | $1.0 \cdot 10^{-10}$                            | $1.2 \cdot 10^2$                                | a, b |
| <b>Propagation</b>   | $R_{prim,end,i} + O_2 \rightleftharpoons R_{prim,end,i}O_2^*$                                                                  | $4.0 \cdot 10^6$                                | 0.0                                             | 1    |
|                      | $R_{sec,mid,i} + O_2 \rightleftharpoons R_{sec,mid,i}O_2^*$                                                                    | $4.0 \cdot 10^6$                                | 0.0                                             | 1    |
|                      | $R_{prim,end,i}O_2^* + R_{prim,end,j}O_2^* \rightleftharpoons R_{prim,end,i}O^* + R_{prim,end,j}O^*$                           | 0.0                                             | 0.0                                             | 7    |
|                      | $R_{prim,end,i}O_2^* + R_{sec,mid,j}O_2^* \rightleftharpoons R_{prim,end,i}O^* + R_{sec,mid,j}O^*$                             | 0.0                                             | 0.0                                             | 7    |
|                      | $R_{sec,mid,i}O_2^* + R_{sec,mid,j}O_2^* \rightleftharpoons R_{sec,mid,i}O^* + R_{sec,mid,j}O^*$                               | 0.0                                             | 0.0                                             | 7    |
| <b>H-abstraction</b> | $R_{prim,end,i}O_2^* + P_{secH,j} \rightleftharpoons R_{prim,end,i}OOH + R_{sec,mid,j}$                                        | $1.8 \cdot 10^{-9}$                             | $3.6 \cdot 10^0$                                | d    |
|                      | $R_{sec,mid,i}O_2^* + P_{secH,j} \rightleftharpoons R_{sec,mid,i}OOH + R_{sec,mid,j}$                                          | $2.7 \cdot 10^{-8}$                             | $1.6 \cdot 10^1$                                | c    |
|                      | $R_{prim,end,i} + P_{secH,j} \rightleftharpoons P_i + R_{sec,mid,j}$                                                           | $7.9 \cdot 10^{-7}$                             | $3.7 \cdot 10^{-7}$                             | d    |
|                      | $R_{sec,mid,i} + P_{secH,j} \rightleftharpoons P_i + R_{sec,mid,j}$                                                            | $1.2 \cdot 10^{-4}$                             | $1.2 \cdot 10^{-4}$                             | c    |
|                      | $R_{prim,end,i}O^* + P_{secH,j} \rightleftharpoons R_{prim,end,i}OH + R_{sec,mid,j}$                                           | $3.7 \cdot 10^2$                                | $4.7 \cdot 10^{-4}$                             | d    |
|                      | $R_{sec,mid,i}O^* + P_{secH,j} \rightleftharpoons R_{sec,mid,i}OH + R_{sec,mid,j}$                                             | $3.8 \cdot 10^2$                                | $9.2 \cdot 10^{-5}$                             | c    |
| <b>β-scission</b>    | $R_{sec,mid,i} \rightleftharpoons P_j + R_{prim,end,i-j}$                                                                      | $8.7 \cdot 10^{-8}$                             | 0.0                                             | 3    |
| <b>Termination</b>   | $R_{prim,end,i}O_2^* + R_{prim,end,j} \rightleftharpoons R_{prim,end,i}OOR_{prim,end,j}$                                       | $1.2 \cdot 10^2$                                | 0.0                                             | b    |
|                      | $R_{prim,end,i}O_2^* + R_{sec,mid,j} \rightleftharpoons R_{prim,end,i}OOR_{sec,mid,j}$                                         | $1.2 \cdot 10^2$                                | 0.0                                             | b    |
|                      | $R_{sec,mid,i}O_2^* + R_{prim,end,j} \rightleftharpoons R_{sec,mid,i}OOR_{prim,end,j}$                                         | $1.2 \cdot 10^2$                                | 0.0                                             | b    |
|                      | $R_{sec,mid,i}O_2^* + R_{sec,mid,j} \rightleftharpoons R_{sec,mid,i}OOR_{sec,mid,j}$                                           | $1.2 \cdot 10^2$                                | 0.0                                             | b    |
|                      | $R_{prim,end,i}O_2^* + R_{prim,end,j}O_2^* \rightleftharpoons R_{prim,end,i}C(O)H + R_{prim,end,j}C(O)H$                       | $1.6 \cdot 10^6$                                | 0.0                                             | 8    |
|                      | $R_{prim,end,i}O_2^* + R_{sec,mid,j}O_2^* \rightleftharpoons R_{prim,end,i}C(O)H + R_{sec,mid,j}C(O)H$                         | $1.6 \cdot 10^6$                                | 0.0                                             | 8    |
|                      | $R_{sec,mid,i}O_2^* + R_{prim,end,j}O_2^* \rightleftharpoons R_{sec,mid,i}C(O)R_{sec,mid,j} + R_{prim,end,j}C(O)R_{sec,mid,i}$ | $1.6 \cdot 10^6$                                | 0.0                                             | 8    |
|                      | $R_{sec,mid,i}O_2^* + R_{sec,mid,j}O_2^* \rightleftharpoons R_{sec,mid,i}C(O)R_{sec,mid,j} + R_{sec,mid,j}C(O)R_{sec,mid,i}$   | $1.6 \cdot 10^6$                                | 0.0                                             | 8    |
| <b>Re-initiation</b> | $R_{prim,end,i}OOR_{prim,end,j} \rightleftharpoons R_{prim,end,i}O^* + R_{prim,end,j}O^*$                                      | $8.4 \cdot 10^{-13}$                            | 0.0                                             | 5    |
|                      | $R_{prim,end,i}OOR_{sec,mid,j} \rightleftharpoons R_{prim,end,i}O^* + R_{sec,mid,j}O^*$                                        | $8.4 \cdot 10^{-13}$                            | 0.0                                             | 5    |

<sup>a</sup>Forward rate coefficient: value chosen to reach realistic timescales (approximately one month is required to reduce the average chain length by a factor two); <sup>b</sup>Reverse rate coefficient: calculated using diffusion coefficient from Roland *et al.*<sup>6</sup> and Smoluchowski relationship ( $r = 4.7 \cdot 10^{-10}$  m); <sup>c</sup>Calculated in this work; see Table S1; <sup>d</sup>H abstraction rate coefficients for primary radicals are calculated based on results for secondary and tertiary radicals (Table S1) assuming a geometric average for reaction rate coefficients involving secondary radical types, corresponding to an arithmetic mean for the activation energies.

**Table S6.** Reaction mechanism for the autoxidation of poly(isobutylene); also given are the rate coefficients ((L mol<sup>-1</sup>) s<sup>-1</sup>) at 298 K; P = dead polymer chain, R\* = polymer alkyl radical; RO\* = polymer alkoxy radical; RO<sub>2</sub>\* = polymer alkyl peroxy radical; end-groups according to Figure S3; *i* and *j* represent carbon number.

| Reaction | Reaction Equation | $k_f$ ((L mol <sup>-1</sup> ) s <sup>-1</sup> ) | $k_r$ ((L mol <sup>-1</sup> ) s <sup>-1</sup> ) | Ref. |
|----------|-------------------|-------------------------------------------------|-------------------------------------------------|------|
|----------|-------------------|-------------------------------------------------|-------------------------------------------------|------|

|                                                                                             |                                                                                                                    | s <sup>-1</sup> )                                                                           | 1) s <sup>-1</sup> )  |      |   |
|---------------------------------------------------------------------------------------------|--------------------------------------------------------------------------------------------------------------------|---------------------------------------------------------------------------------------------|-----------------------|------|---|
| <b>Initiation</b>                                                                           | $P_i \rightleftharpoons R_{prim,end,j} + R_{tert,end,i-j}$                                                         | 1.0 10 <sup>-10</sup>                                                                       | 1.2 10 <sup>2</sup>   | a, b |   |
| <b>Propagation</b>                                                                          | $R_{prim,end,i} + O_2 \rightleftharpoons R_{prim,end,i}O_2^*$                                                      | 4.0 10 <sup>6</sup>                                                                         | 0.0                   | 1    |   |
|                                                                                             | $R_{sec,mid,i} + O_2 \rightleftharpoons R_{sec,mid,i}O_2^*$                                                        | 4.0 10 <sup>6</sup>                                                                         | 0.0                   | 1    |   |
|                                                                                             | $R_{tert,end,i} + O_2 \rightleftharpoons R_{tert,end,i}O_2^*$                                                      | 4.0 10 <sup>6</sup>                                                                         | 0.0                   | 1    |   |
|                                                                                             | $R_{prim,end,i}O_2^* + R_{prim,end,j}O_2^* \rightleftharpoons R_{prim,end,i}O^* + R_{prim,end,j}O^*$               | 0.0                                                                                         | 0.0                   | 7    |   |
|                                                                                             | $R_{prim,end,i}O_2^* + R_{sec,mid,j}O_2^* \rightleftharpoons R_{prim,end,i}O^* + R_{sec,mid,j}O^*$                 | 0.0                                                                                         | 0.0                   | 7    |   |
|                                                                                             | $R_{prim,end,i}O_2^* + R_{tert,end,j}O_2^* \rightleftharpoons R_{prim,end,i}O^* + R_{tert,end,j}O^*$               | 0.0                                                                                         | 0.0                   | 7    |   |
|                                                                                             | $R_{sec,mid,i}O_2^* + R_{sec,mid,j}O_2^* \rightleftharpoons R_{sec,mid,i}O^* + R_{sec,mid,j}O^*$                   | 0.0                                                                                         | 0.0                   | 7    |   |
|                                                                                             | $R_{sec,mid,i}O_2^* + R_{tert,end,j}O_2^* \rightleftharpoons R_{sec,mid,i}O^* + R_{tert,end,j}O^*$                 | 0.0                                                                                         | 0.0                   | 7    |   |
|                                                                                             | $R_{tert,end,i}O_2^* + R_{tert,end,j}O_2^* \rightleftharpoons R_{tert,end,i}O^* + R_{tert,end,j}O^*$               | 8.5 10 <sup>3</sup>                                                                         | 0.0                   | 9    |   |
| <b>H-abstraction</b>                                                                        | $R_{prim,end,i}O_2^* + P_{secH,j} \rightleftharpoons R_{prim,end,i}OOH + R_{sec,mid,j}O_2^*$                       | 1.8 10 <sup>-9</sup>                                                                        | 3.6 10 <sup>0</sup>   | d    |   |
|                                                                                             | $R_{sec,mid,i}O_2^* + P_{secH,j} \rightleftharpoons R_{sec,mid,i}OOH + R_{sec,mid,j}O_2^*$                         | 2.7 10 <sup>-8</sup>                                                                        | 1.6 10 <sup>-1</sup>  | c    |   |
|                                                                                             | $R_{tert,end,i}O_2^* + P_{secH,j} \rightleftharpoons R_{tert,end,i}OOH + R_{sec,mid,j}O_2^*$                       | 4.0 10 <sup>-7</sup>                                                                        | 7.2 10 <sup>1</sup>   | c    |   |
|                                                                                             | $R_{prim,end,i} + P_{secH,j} \rightleftharpoons P_i + R_{sec,mid,j}O_2^*$                                          | 8.0 10 <sup>-7</sup>                                                                        | 3.7 10 <sup>-7</sup>  | d    |   |
|                                                                                             | $R_{sec,mid,i} + P_{secH,j} \rightleftharpoons P_i + R_{sec,mid,j}O_2^*$                                           | 1.2 10 <sup>-4</sup>                                                                        | 1.2 10 <sup>-4</sup>  | c    |   |
|                                                                                             | $R_{tert,end,i} + P_{secH,j} \rightleftharpoons P_i + R_{sec,mid,j}O_2^*$                                          | 1.8 10 <sup>-2</sup>                                                                        | 3.9 10 <sup>-2</sup>  | c    |   |
|                                                                                             | $R_{prim,end,i}O^* + P_{secH,j} \rightleftharpoons R_{prim,end,i}OH + R_{sec,mid,j}O_2^*$                          | 3.7 10 <sup>2</sup>                                                                         | 4.7 10 <sup>-4</sup>  | d    |   |
|                                                                                             | $R_{sec,mid,i}O^* + P_{secH,j} \rightleftharpoons R_{sec,mid,i}OH + R_{sec,mid,j}O_2^*$                            | 3.8 10 <sup>2</sup>                                                                         | 9.2 10 <sup>-5</sup>  | c    |   |
|                                                                                             | $R_{tert,end,i}O^* + P_{secH,j} \rightleftharpoons R_{tert,end,i}OH + R_{sec,mid,j}O_2^*$                          | 3.8 10 <sup>2</sup>                                                                         | 1.8 10 <sup>-5</sup>  | c    |   |
| <b>β-scission</b>                                                                           | $R_{sec,mid,i} \rightleftharpoons P_j + R_{tert,end,i-j}$                                                          | 8.7 10 <sup>-8</sup>                                                                        | 0.0                   | 3    |   |
| <b>Termination</b>                                                                          | $R_{prim,end,i}O_2^* + R_{prim,end,j} \rightleftharpoons R_{prim,end,i}OOR_{prim,end,j}$                           | 1.2 10 <sup>2</sup>                                                                         | 0.0                   | b    |   |
|                                                                                             | $R_{prim,end,i}O_2^* + R_{sec,mid,j} \rightleftharpoons R_{prim,end,i}OOR_{sec,mid,j}$                             | 1.2 10 <sup>2</sup>                                                                         | 0.0                   | b    |   |
|                                                                                             | $R_{prim,end,i}O_2^* + R_{tert,end,j} \rightleftharpoons R_{prim,end,i}OOR_{tert,end,j}$                           | 1.2 10 <sup>2</sup>                                                                         | 0.0                   | b    |   |
|                                                                                             | $R_{sec,mid,i}O_2^* + R_{prim,end,j} \rightleftharpoons R_{sec,mid,i}OOR_{prim,end,j}$                             | 1.2 10 <sup>2</sup>                                                                         | 0.0                   | b    |   |
|                                                                                             | $R_{sec,mid,i}O_2^* + R_{sec,mid,j} \rightleftharpoons R_{sec,mid,i}OOR_{sec,mid,j}$                               | 1.2 10 <sup>2</sup>                                                                         | 0.0                   | b    |   |
|                                                                                             | $R_{sec,mid,i}O_2^* + R_{tert,end,j} \rightleftharpoons R_{sec,mid,i}OOR_{tert,end,j}$                             | 1.2 10 <sup>2</sup>                                                                         | 0.0                   | b    |   |
|                                                                                             | $R_{tert,end,i}O_2^* + R_{prim,end,j} \rightleftharpoons R_{tert,end,i}OOR_{prim,end,j}$                           | 1.2 10 <sup>2</sup>                                                                         | 0.0                   | b    |   |
|                                                                                             | $R_{tert,end,i}O_2^* + R_{sec,mid,j} \rightleftharpoons R_{tert,end,i}OOR_{sec,mid,j}$                             | 1.2 10 <sup>2</sup>                                                                         | 0.0                   | b    |   |
|                                                                                             | $R_{tert,end,i}O_2^* + R_{tert,end,j} \rightleftharpoons R_{tert,end,i}OOR_{tert,end,j}$                           | 1.2 10 <sup>2</sup>                                                                         | 0.0                   | b    |   |
|                                                                                             | $R_{prim,end,i}O_2^* + R_{prim,end,j}O_2^* \rightleftharpoons R_{prim,end,i}C(O)H + R_{prim,end,j}O_2^*$           | 1.6 10 <sup>6</sup>                                                                         | 0.0                   | 8    |   |
|                                                                                             | $R_{prim,end,i}O_2^* + R_{sec,mid,j}O_2^* \rightleftharpoons R_{prim,end,i}C(O)H + R_{sec,mid,j}O_2^*$             | 1.6 10 <sup>6</sup>                                                                         | 0.0                   | 8    |   |
|                                                                                             | $R_{prim,end,i}O_2^* + R_{tert,end,j}O_2^* \rightleftharpoons R_{prim,end,i}C(O)H + R_{tert,end,j}O_2^*$           | 0.0                                                                                         | 0.0                   | 7    |   |
|                                                                                             | $R_{sec,mid,i}O_2^* + R_{prim,end,j}O_2^* \rightleftharpoons R_{sec,mid,i}C(O)R_{sec,mid,j} + R_{prim,end,j}O_2^*$ | 1.6 10 <sup>6</sup>                                                                         | 0.0                   | 8    |   |
|                                                                                             | $R_{sec,mid,i}O_2^* + R_{sec,mid,j}O_2^* \rightleftharpoons R_{sec,mid,i}C(O)R_{sec,mid,j} + R_{sec,mid,j}O_2^*$   | 1.6 10 <sup>6</sup>                                                                         | 0.0                   | 8    |   |
|                                                                                             | $R_{sec,mid,i}O_2^* + R_{tert,end,j}O_2^* \rightleftharpoons R_{sec,mid,i}C(O)R_{sec,mid,j} + R_{tert,end,j}O_2^*$ | 0.0                                                                                         | 0.0                   | 7    |   |
|                                                                                             | $R_{tert,end,i}O_2^* + R_{prim,end,j}O_2^* \rightleftharpoons R_{tert,end,i}C(O)H + R_{prim,end,j}O_2^*$           | 0.0                                                                                         | 0.0                   | 7    |   |
|                                                                                             | $R_{tert,end,i}O_2^* + R_{sec,mid,j}O_2^* \rightleftharpoons R_{tert,end,i}C(O)H + R_{sec,mid,j}O_2^*$             | 0.0                                                                                         | 0.0                   | 7    |   |
|                                                                                             | $R_{tert,end,i}O_2^* + R_{tert,end,j}O_2^* \rightleftharpoons R_{tert,end,i}C(O)H + R_{tert,end,j}O_2^*$           | 0.0                                                                                         | 0.0                   | 7    |   |
|                                                                                             | <b>Re-initiation</b>                                                                                               | $R_{prim,end,i}OOR_{prim,end,j} \rightleftharpoons R_{prim,end,i}O^* + R_{prim,end,j}O_2^*$ | 8.4 10 <sup>-13</sup> | 0.0  | 5 |
|                                                                                             |                                                                                                                    | $R_{prim,end,i}OOR_{sec,mid,j} \rightleftharpoons R_{prim,end,i}O^* + R_{sec,mid,j}O_2^*$   | 8.4 10 <sup>-13</sup> | 0.0  | 5 |
| $R_{prim,end,i}OOR_{tert,end,j} \rightleftharpoons R_{prim,end,i}O^* + R_{tert,end,j}O_2^*$ |                                                                                                                    | 1.0 10 <sup>-13</sup>                                                                       | 0.0                   | 5    |   |

|                                                                                           |                      |     |   |
|-------------------------------------------------------------------------------------------|----------------------|-----|---|
| $R_{sec,mid,i}OOR_{sec,mid,j} \rightleftharpoons R_{sec,mid,i}O^* + R_{sec,mid,j}O^*$     | $8.4 \cdot 10^{-13}$ | 0.0 | 5 |
| $R_{sec,mid,i}OOR_{tert,end,j} \rightleftharpoons R_{sec,mid,i}O^* + R_{tert,end,j}O^*$   | $1.0 \cdot 10^{-13}$ | 0.0 | 5 |
| $R_{tert,end,i}OOR_{tert,end,j} \rightleftharpoons R_{tert,end,i}O^* + R_{tert,end,j}O^*$ | $1.0 \cdot 10^{-13}$ | 0.0 | 5 |

<sup>a</sup>Forward rate coefficient: value chosen to reach realistic timescales (approximately one month is required to reduce the average chain length by a factor two); <sup>b</sup>Reverse rate coefficient: calculated using diffusion coefficient from Roland *et al.*<sup>6</sup> and Smoluchowski relationship ( $r = 4.7 \cdot 10^{-10}$  m); <sup>c</sup>Calculated in this work; see Table S1; <sup>d</sup>H abstraction rate coefficients for primary radicals are calculated based on results for secondary and tertiary radicals (Table S1) assuming a geometric average for reaction rate coefficients involving secondary radical types, corresponding to an arithmetic mean for the activation energies.

## S4. Additional simulation results for autoxidation modelling

### S4.1. Confirmation of chain reaction mechanism

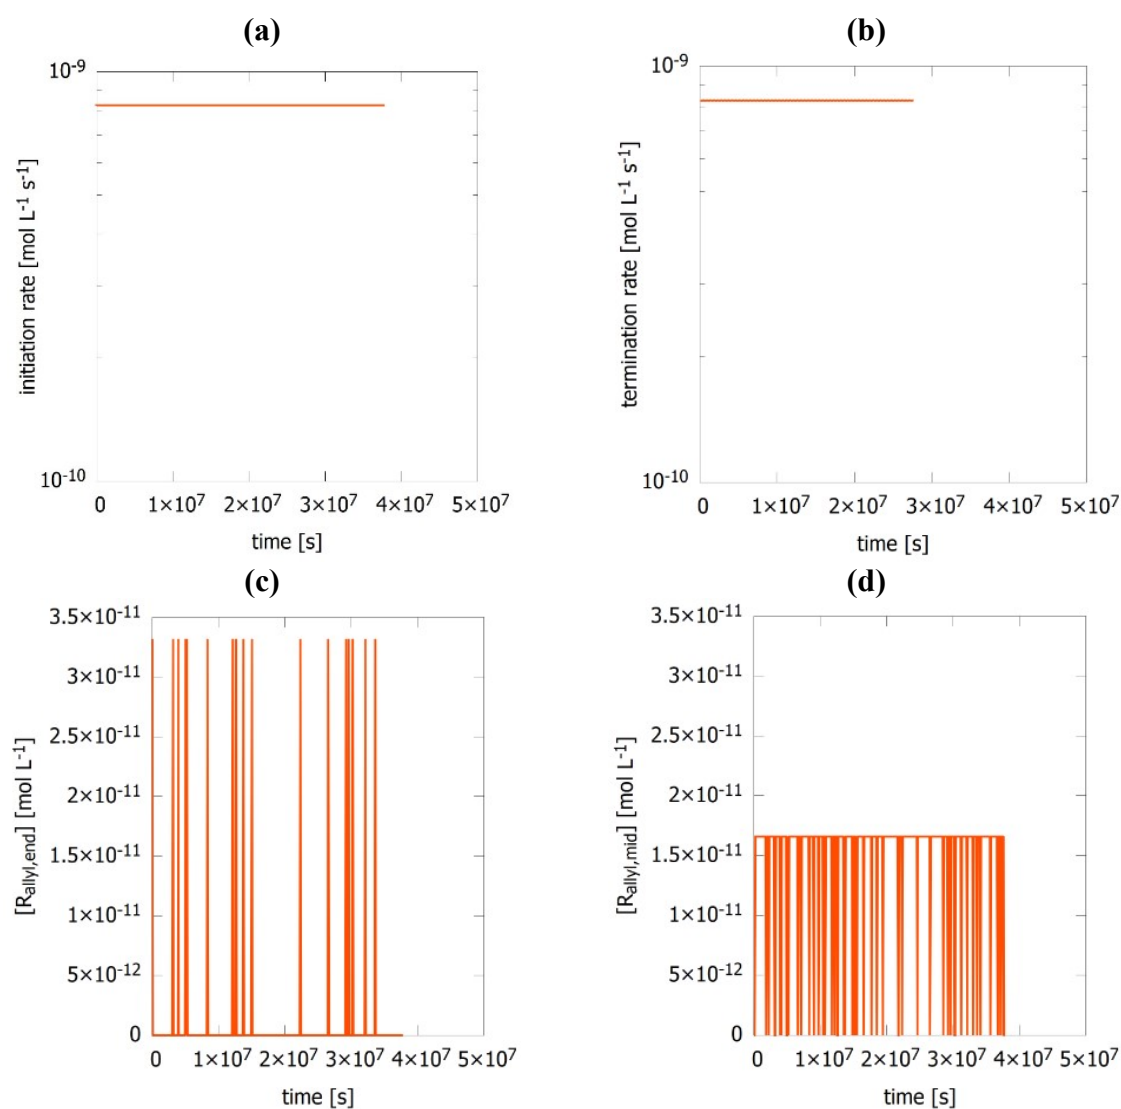

**Figure S5.** Chain reaction mechanism for poly(butadiene): (a) total initiation rate (mol L<sup>-1</sup> s<sup>-1</sup>), (b) total termination rate (mol L<sup>-1</sup> s<sup>-1</sup>), (c) concentration of R<sub>allyl,end</sub> (mol L<sup>-1</sup>), and (d) concentration of R<sub>allyl,mid</sub> (mol L<sup>-1</sup>) as a function of time (s).

(a)

(b)

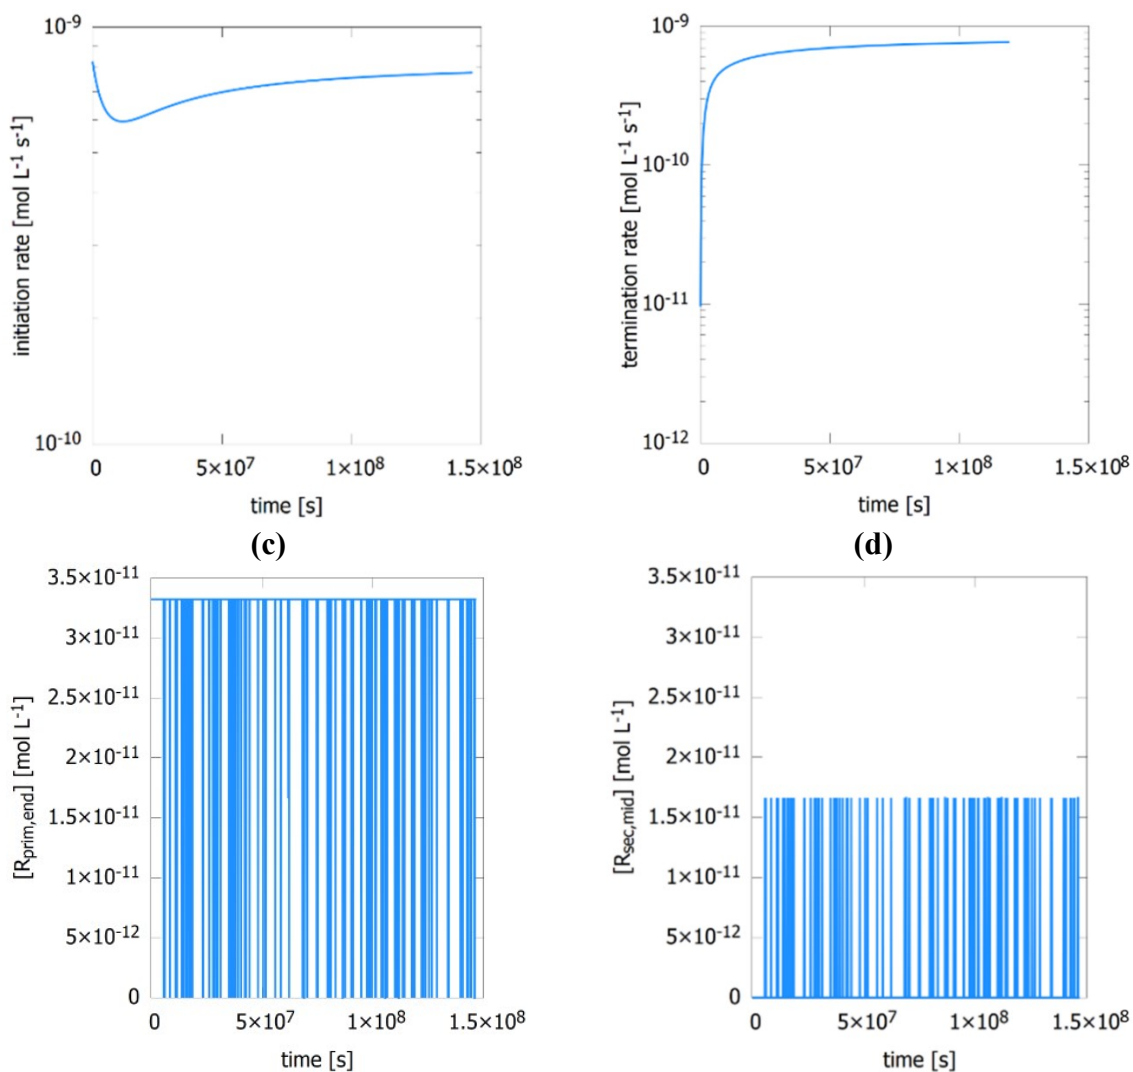

**Figure S6.** Chain reaction mechanism for poly(ethylene): **(a)** total initiation rate (mol L<sup>-1</sup> s<sup>-1</sup>), **(b)** total termination rate (mol L<sup>-1</sup> s<sup>-1</sup>), **(c)** concentration of R<sub>prim,end</sub> (mol L<sup>-1</sup>), and **(d)** concentration of R<sub>sec,mid</sub> (mol L<sup>-1</sup>) as a function of time (s).

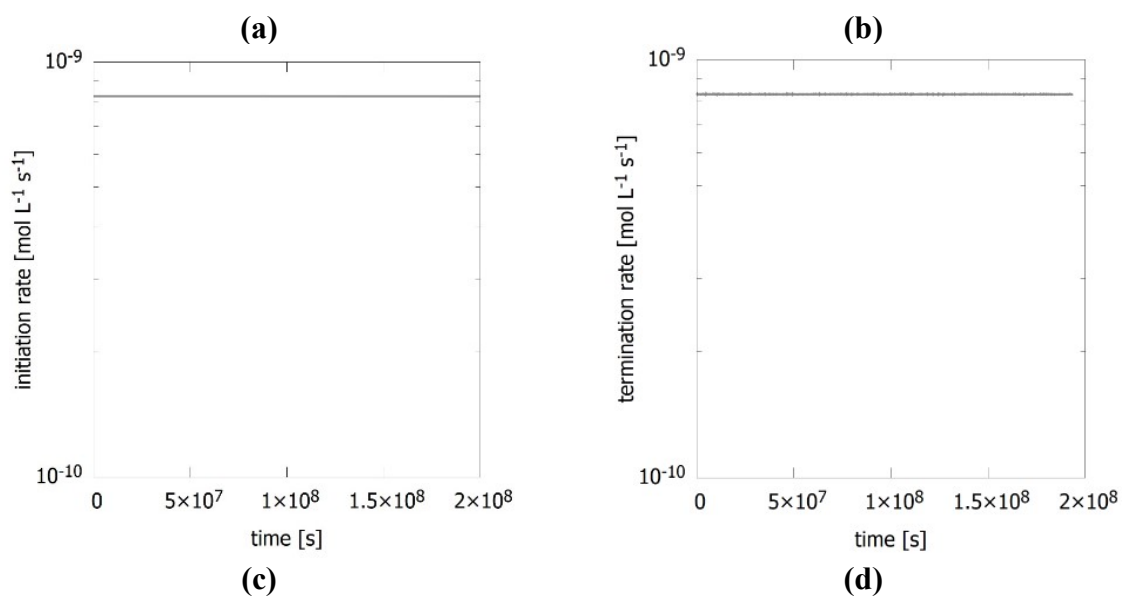

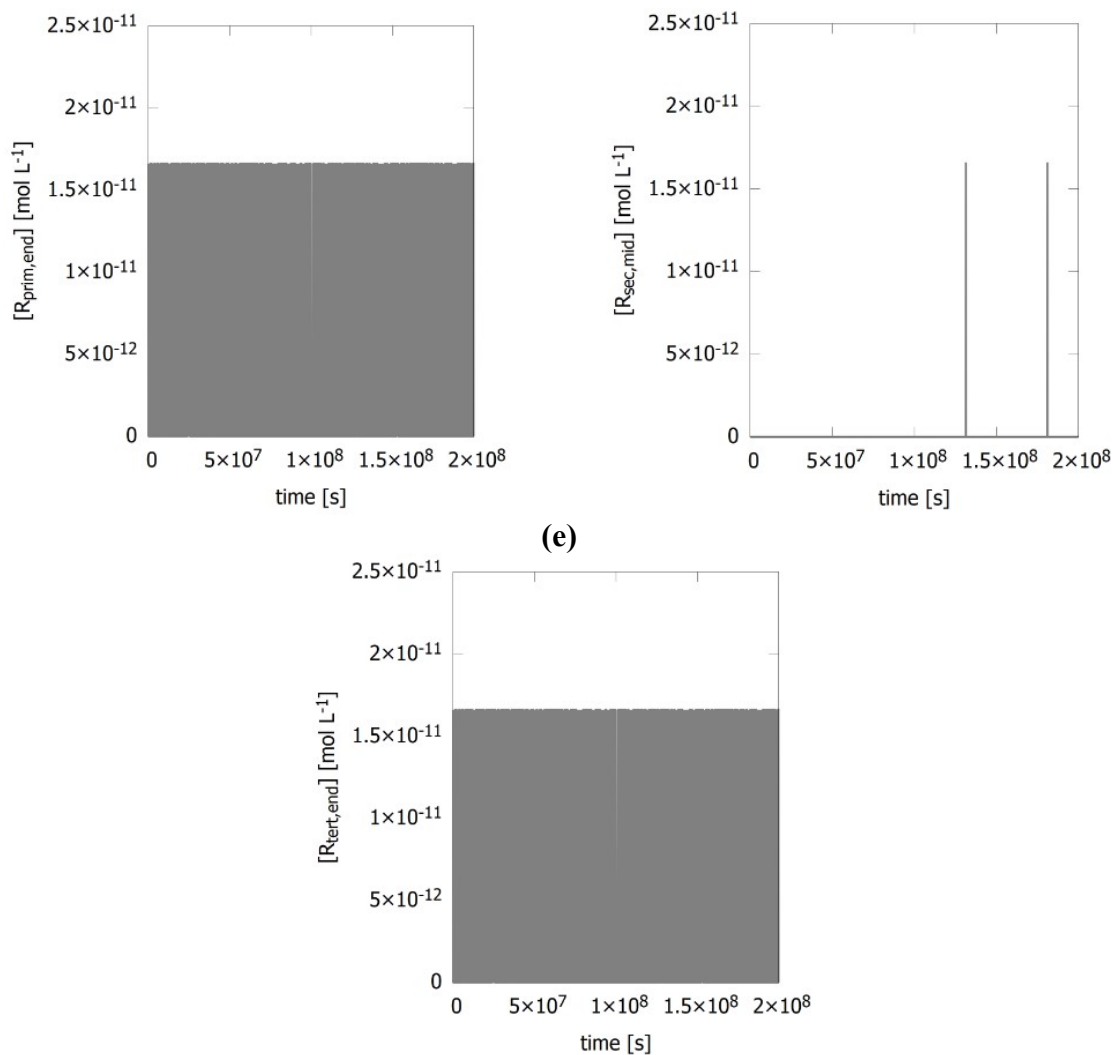

**Figure S7.** Chain reaction mechanism for poly(isobutylene): **(a)** total initiation rate (mol L<sup>-1</sup> s<sup>-1</sup>), **(b)** total termination rate (mol L<sup>-1</sup> s<sup>-1</sup>), concentration of **(c)** R<sub>pim,end</sub> (mol L<sup>-1</sup>), **(d)** R<sub>sec,mid</sub> (mol L<sup>-1</sup>), and **(e)** R<sub>tert,end</sub> (mol L<sup>-1</sup>) as a function of time (s).

### S4.2. Additional simulation results for poly(butadiene)

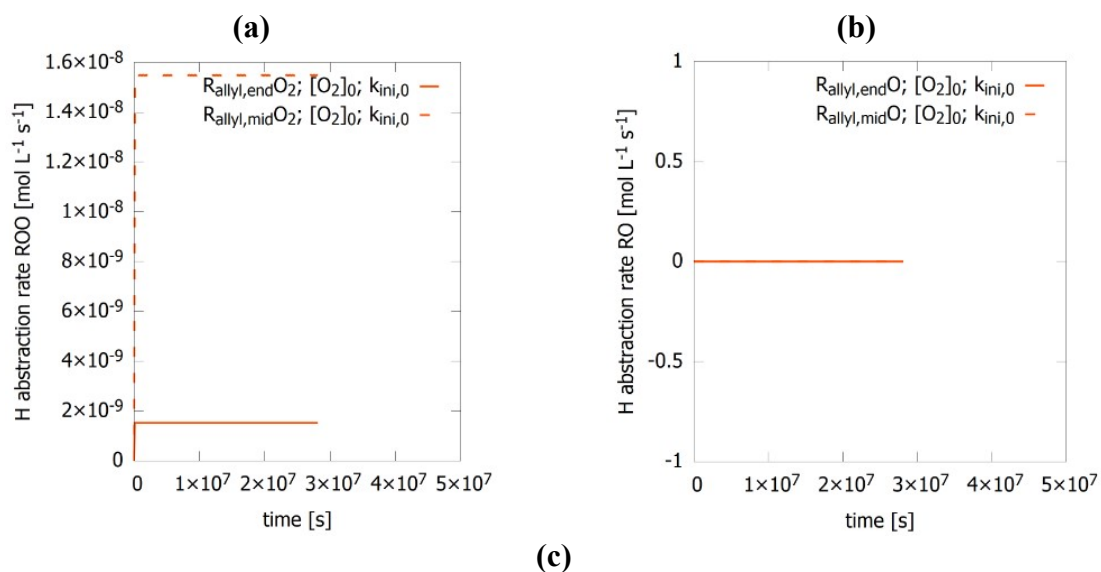

(c)

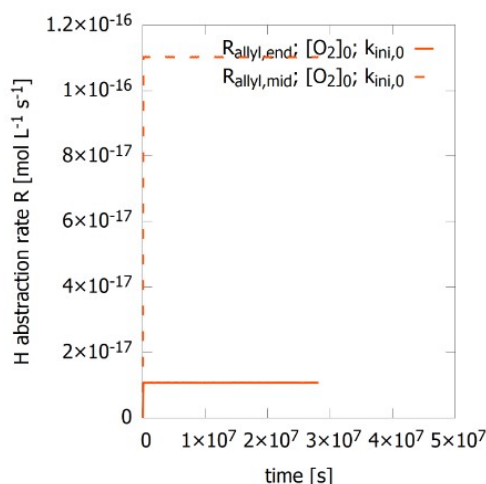

**Figure S8.** Hydrogen abstraction reaction rates for poly(isobutylene) ( $\text{mol L}^{-1} \text{s}^{-1}$ ) for: **(a)** alkylperoxyl radicals  $\text{RO}_2^\bullet$ ; **(b)** alkoxy radicals  $\text{RO}^\bullet$  and **(c)** alkyl radicals  $\text{R}^\bullet$  as a function of time (s) for allylic end radicals (full lines) and allylic midchain radicals (dashed lines).

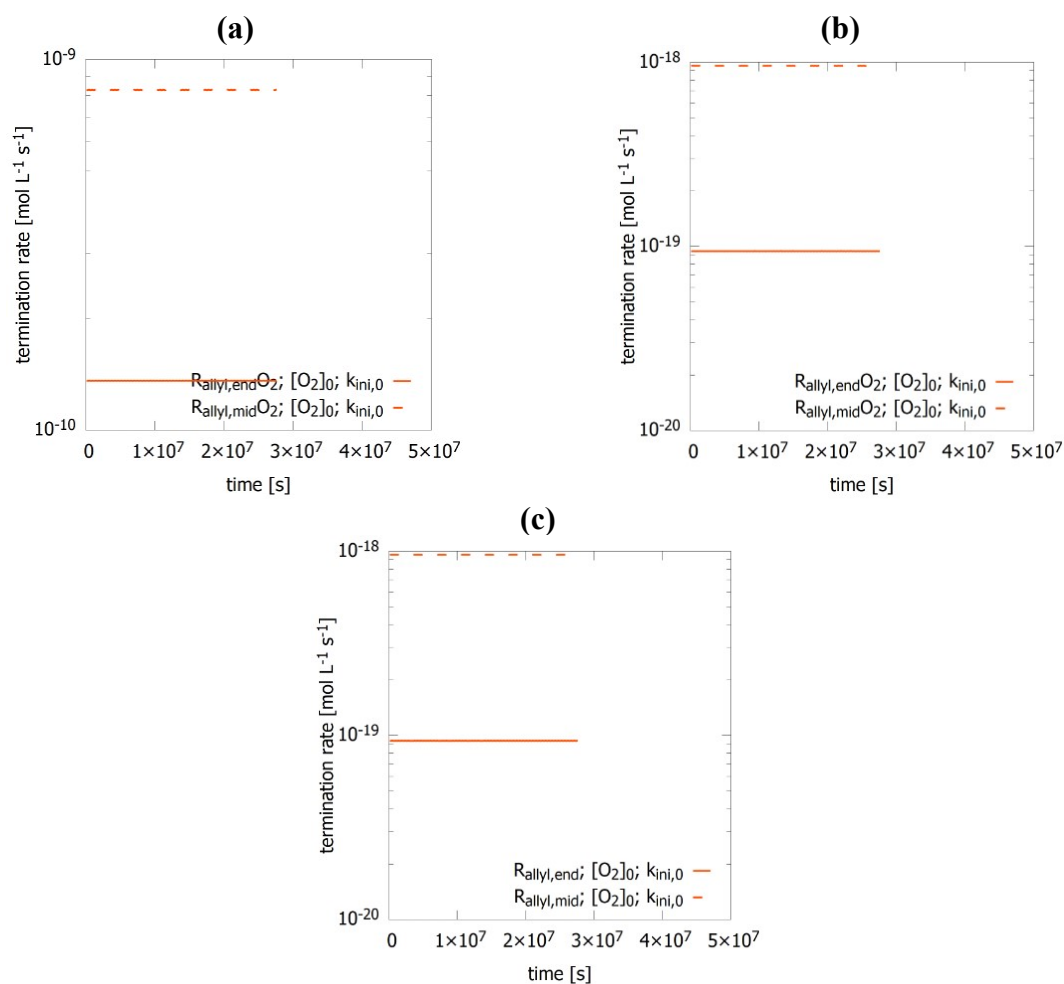

**Figure S9.** Termination reaction rates for poly(isobutylene) ( $\text{mol L}^{-1} \text{s}^{-1}$ ) for: **(a)** termination of two alkylperoxyl radicals ( $\text{RO}_2^\bullet + \text{RO}_2^\bullet$ ), **(b)** and **(c)** termination of alkylperoxyl radical and alkyl radical ( $\text{RO}_2^\bullet + \text{R}^\bullet$ ); reaction partner under consideration is specified in legend; reaction partner related to allylic end radicals (full lines) and allylic midchain radicals (dashed lines); termination reaction rates for alkoxy radicals not shown as equal to 0.

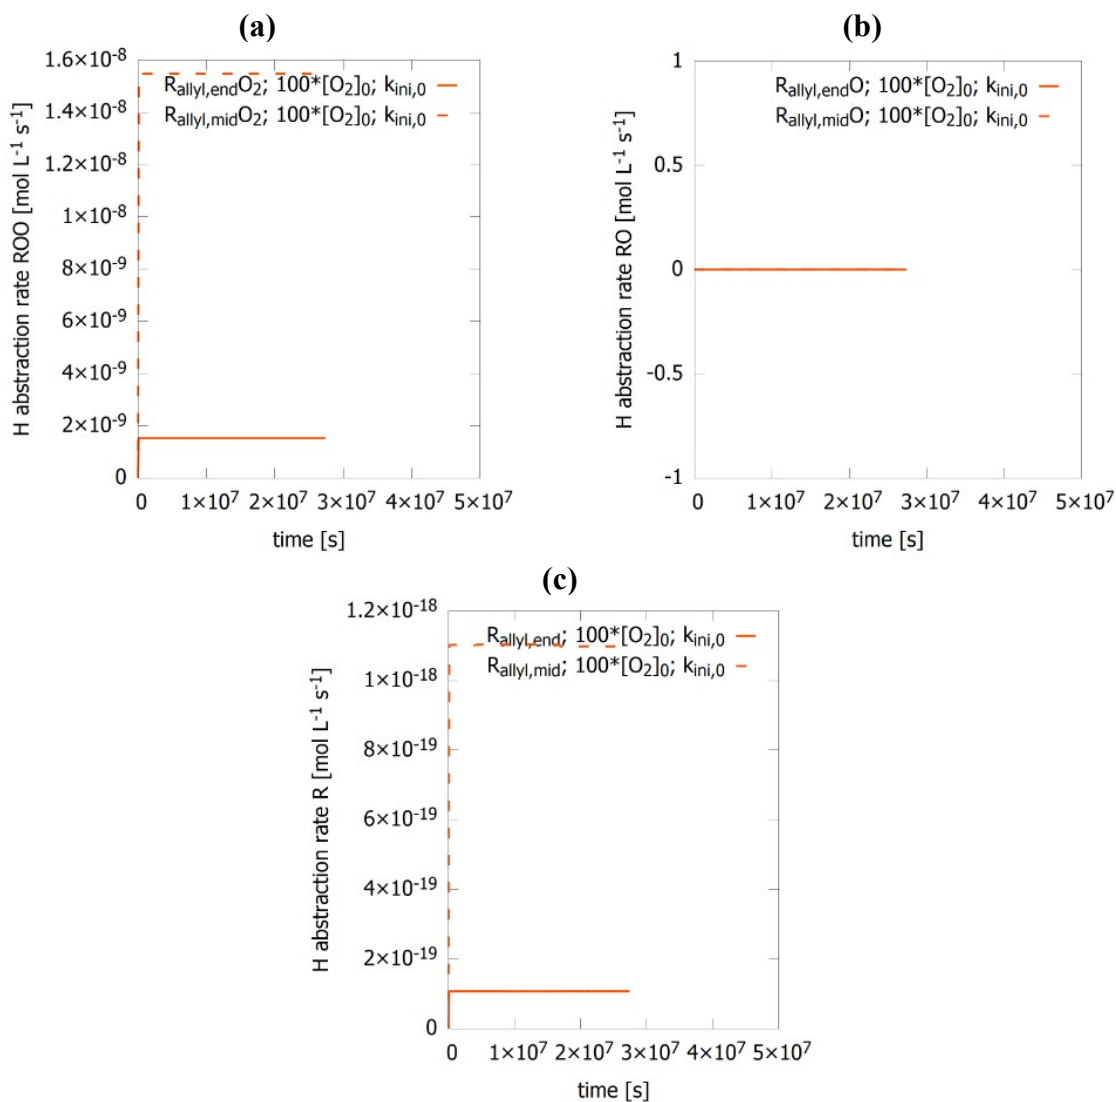

**Figure S10.** Hydrogen abstraction reaction rates for poly(isobutylene) with a higher oxygen concentration ( $[O_2] = 100[O_2]_0$ ) ( $mol\ L^{-1}\ s^{-1}$ ) for: **(a)** alkylperoxyl radicals  $RO_2\cdot$ , **(b)** alkoxy radicals  $RO\cdot$  and **(c)** alkyl radicals  $R\cdot$  as a function of time (s) for allylic end radicals (full lines) and allylic midchain radicals (dashed lines).

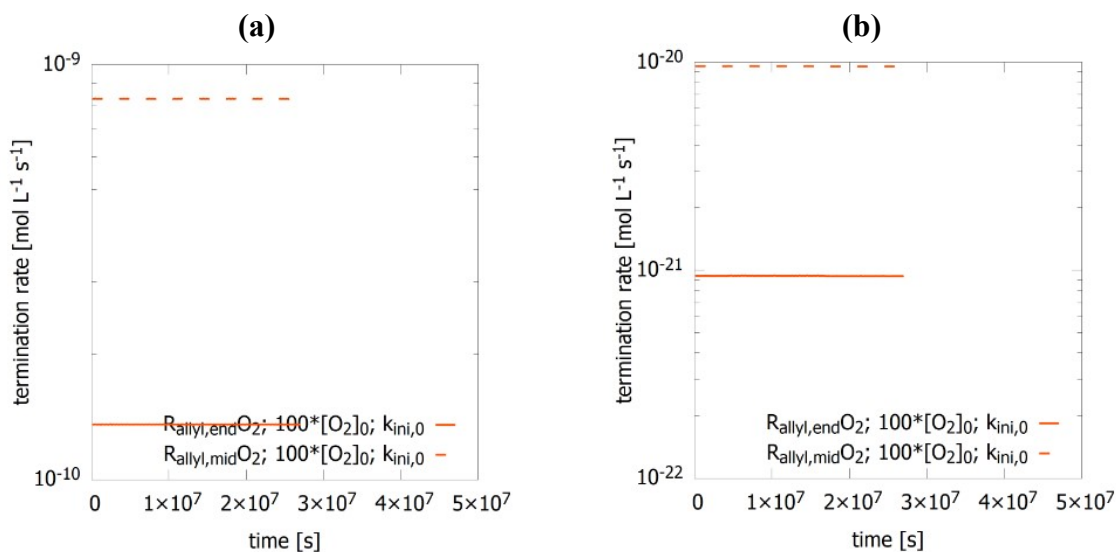



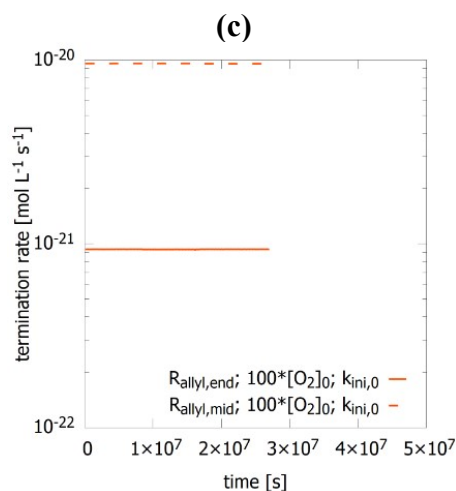

**Figure S11.** Termination reaction rates for poly(isobutylene) with a higher oxygen concentration ( $[O_2] = 100[O_2]_0$ ) ( $\text{mol L}^{-1} \text{s}^{-1}$ ) for: **(a)** termination between two alkylperoxyl radicals ( $RO_2^\bullet + RO_2^\bullet$ ), **(b)** and **(c)** termination between alkylperoxyl radical and alkyl radical ( $RO_2^\bullet + R^\bullet$ ); reaction partner under consideration is specified in legend; reaction partner related to allylic end radicals (full lines) and allylic midchain radicals (dashed lines); termination reaction rates for alkoxy radicals are not shown as they are equal to 0.

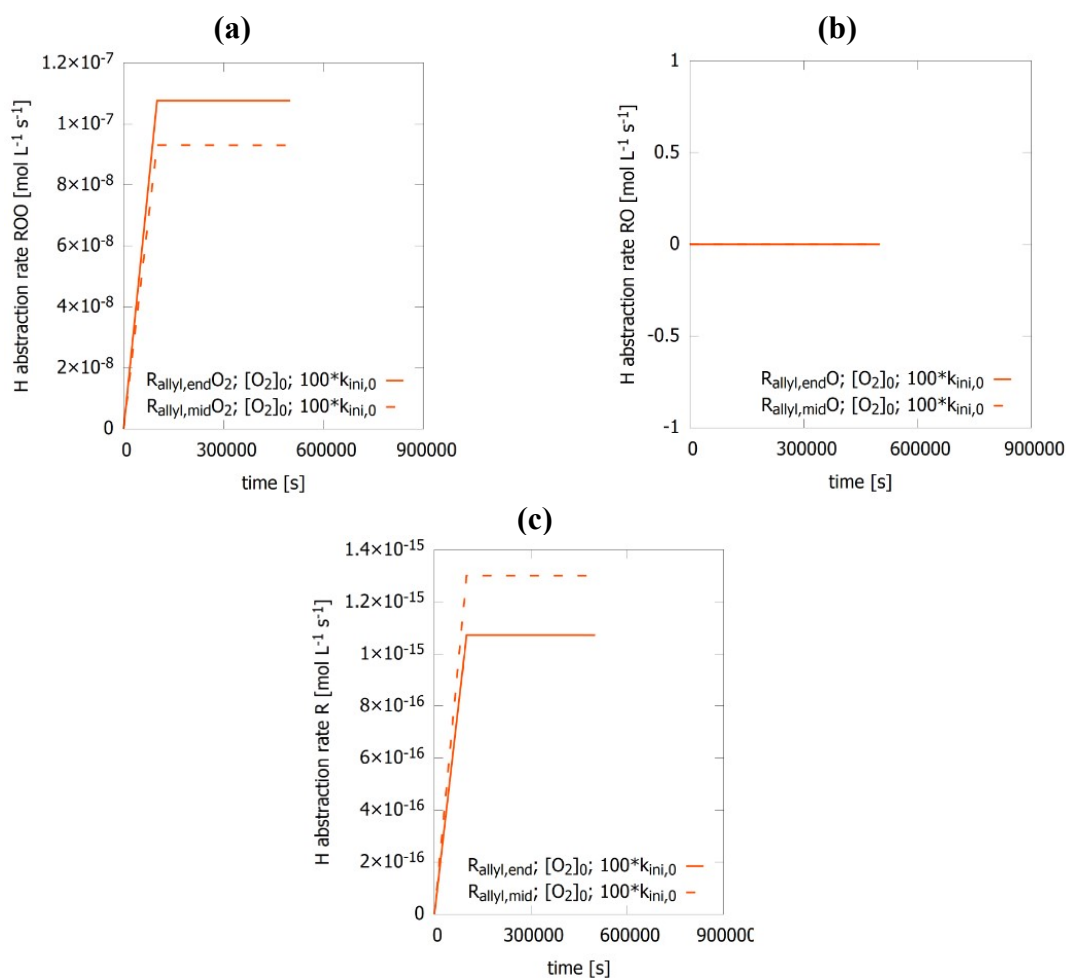

**Figure S12.** Hydrogen abstraction reaction rates for poly(isobutylene) with a higher initiation rate coefficient ( $k_{ini} = 100k_{ini}$ ) ( $\text{mol L}^{-1} \text{s}^{-1}$ ) for: **(a)** alkylperoxyl radicals  $RO_2^\bullet$ , **(b)** alkoxy radicals  $RO^\bullet$  and **(c)** alkyl radicals  $R^\bullet$  as a function of time (s) for allylic end radicals (full lines) and allylic midchain radicals (dashed lines).

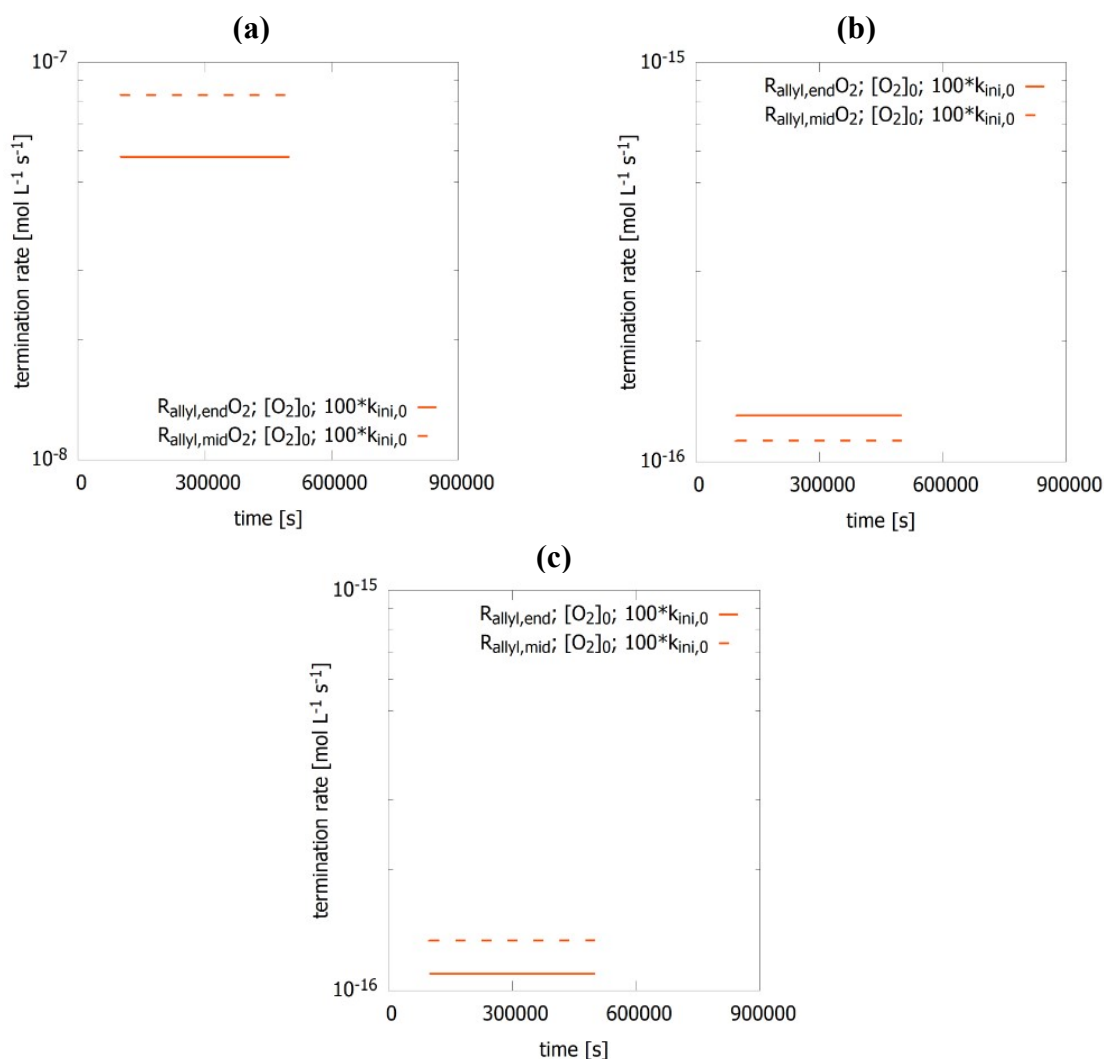

**Figure S13.** Termination reaction rates for poly(isobutylene) with a higher initiation rate coefficient ( $k_{\text{ini}} = 100k_{\text{ini},0}$ ) ( $\text{mol L}^{-1} \text{s}^{-1}$ ) for: **(a)** termination between two alkylperoxyl radicals ( $\text{RO}_2^\bullet + \text{RO}_2^\bullet$ ), **(b)** and **(c)** termination between alkylperoxyl radical and alkyl radical ( $\text{RO}_2^\bullet + \text{R}^\bullet$ ); reaction partner under consideration is specified in legend; reaction partner related to allylic end radicals (full lines) and allylic midchain radicals (dashed lines); termination reaction rates for alkoxy radicals are not shown as they are equal to 0.

**Table S7.** Summary of  $k\text{MC}$  model output related to reaction rates ( $\text{mol L}^{-1} \text{s}^{-1}$ ) of competitive reactions for poly(butadiene) with a higher  $\text{O}_2$  concentration ( $[\text{O}_2] = 100[\text{O}_2]_0$ ); reaction rates as a function of time are given in Figure S10 and S11; red: lowest reaction rates; green: largest reaction rates; values indicated in black are set equal to 0.

| <i>1<sup>st</sup></i><br><i>reaction</i><br><i>partner</i> | <i>Propagation</i>               |                                |                               |                                             | <i>Termination</i>                          |                                          |                                          |
|------------------------------------------------------------|----------------------------------|--------------------------------|-------------------------------|---------------------------------------------|---------------------------------------------|------------------------------------------|------------------------------------------|
|                                                            | $\text{RO}_2^\bullet + \text{P}$ | $\text{RO}^\bullet + \text{P}$ | $\text{R}^\bullet + \text{P}$ | $\text{RO}_2^\bullet + \text{RO}_2^\bullet$ | $\text{RO}_2^\bullet + \text{RO}_2^\bullet$ | $\text{RO}_2^\bullet + \text{R}^\bullet$ | $\text{R}^\bullet + \text{RO}_2^\bullet$ |
| $\mathbf{R}_{\text{allyl,end}}$                            | 2.0 $10^{-9}$                    | 0.0                            | 1.0 $10^{-19}$                | 0.0                                         | 1.5 $10^{-10}$                              | 1.0 $10^{-21}$                           | 1.0 $10^{-21}$                           |
| $\mathbf{R}_{\text{allyl,mid}}$                            | 1.5 $10^{-8}$                    | 0.0                            | 1.0 $10^{-18}$                | 0.0                                         | 7.0 $10^{-9}$                               | 1.0 $10^{-20}$                           | 1.0 $10^{-20}$                           |

**Table S8.** Summary of *k*MCM model output related to reaction rates ( $\text{mol L}^{-1} \text{s}^{-1}$ ) of competitive reactions for poly(butadiene) with a higher initiation rate coefficient ( $k_{\text{ini}} = 100k_{\text{ini}}$ ); reaction rates as a function of time are given in Figure S12 and S13; red: lowest reaction rates; green: largest reaction rates; values indicated in black are set equal to 0.

| <i>I</i> <sup>st</sup><br>reaction<br>partner | <i>Propagation</i>         |                          |                         |                                 | <i>Termination</i>           |                              |                              |
|-----------------------------------------------|----------------------------|--------------------------|-------------------------|---------------------------------|------------------------------|------------------------------|------------------------------|
|                                               | $\text{RO}_2^* + \text{P}$ | $\text{RO}^* + \text{P}$ | $\text{R}^* + \text{P}$ | $\text{RO}_2^* + \text{RO}_2^*$ | $\text{RO}_2^* + \text{R}^*$ | $\text{RO}_2^* + \text{R}^*$ | $\text{R}^* + \text{RO}_2^*$ |
| $\mathbf{R}_{\text{allyl,end}}$               | 1.0 10 <sup>-7</sup>       | 0.0                      | 1.0 10 <sup>-15</sup>   | 0.0                             | 5.0 10 <sup>-8</sup>         | 1.0 10 <sup>-16</sup>        | 1.0 10 <sup>-16</sup>        |
| $\mathbf{R}_{\text{allyl,mid}}$               | 9.0 10 <sup>-8</sup>       | 0.0                      | 1.3 10 <sup>-15</sup>   | 0.0                             | 8.0 10 <sup>-8</sup>         | 1.0 10 <sup>-16</sup>        | 1.0 10 <sup>-16</sup>        |

### S4.3. Additional simulation results for poly(ethylene)

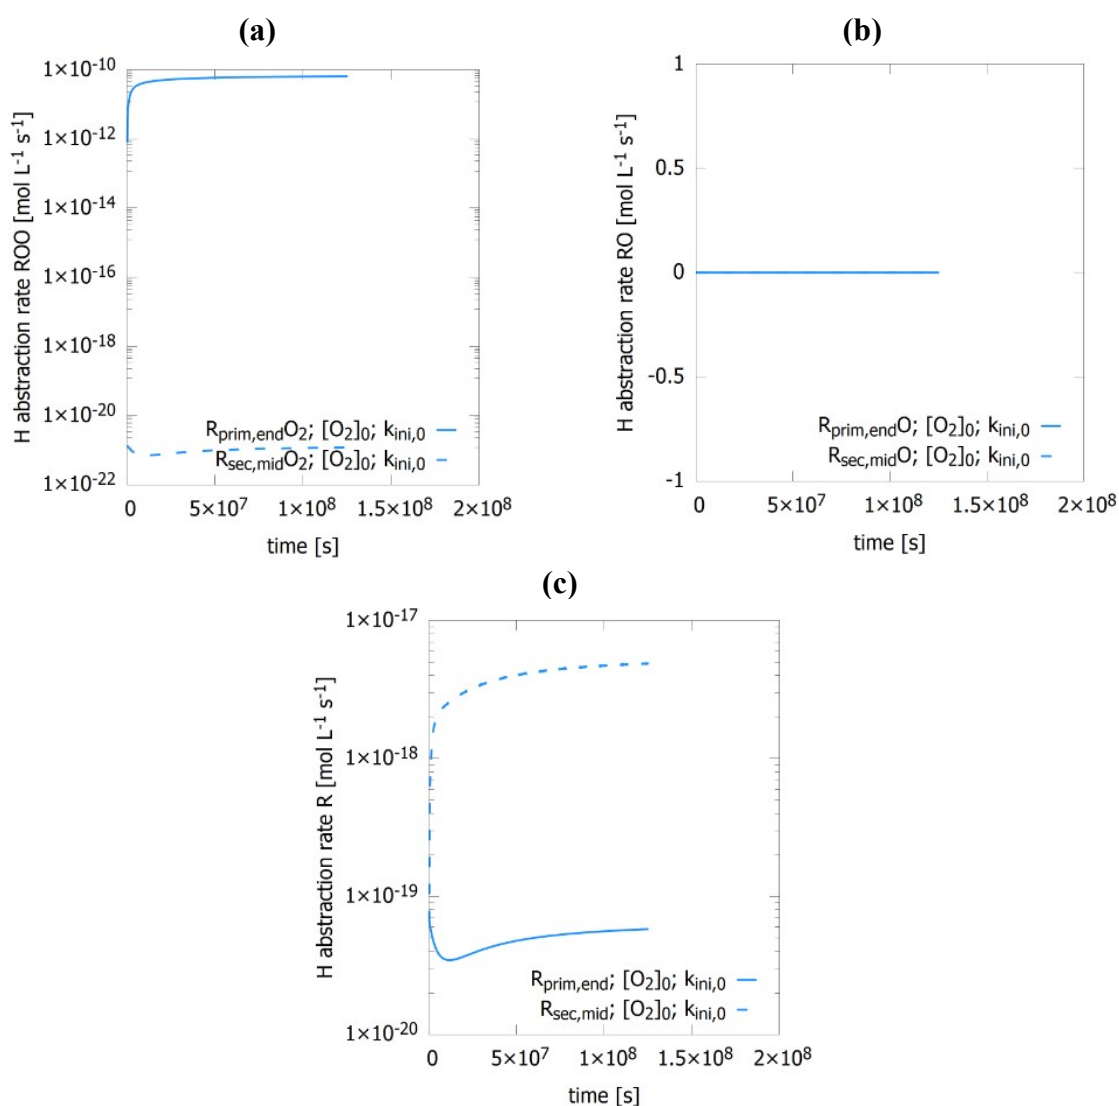

**Figure S14.** Hydrogen abstraction reaction rates for poly(ethylene) ( $\text{mol L}^{-1} \text{s}^{-1}$ ) for: **(a)** alkylperoxyl radicals  $\text{RO}_2^*$ , **(b)** alkoxy radicals  $\text{RO}^*$  and **(c)** alkyl radicals  $\text{R}^*$  as a function of time (s) for primary end- (full lines) and secondary midchain radicals (dashed lines).

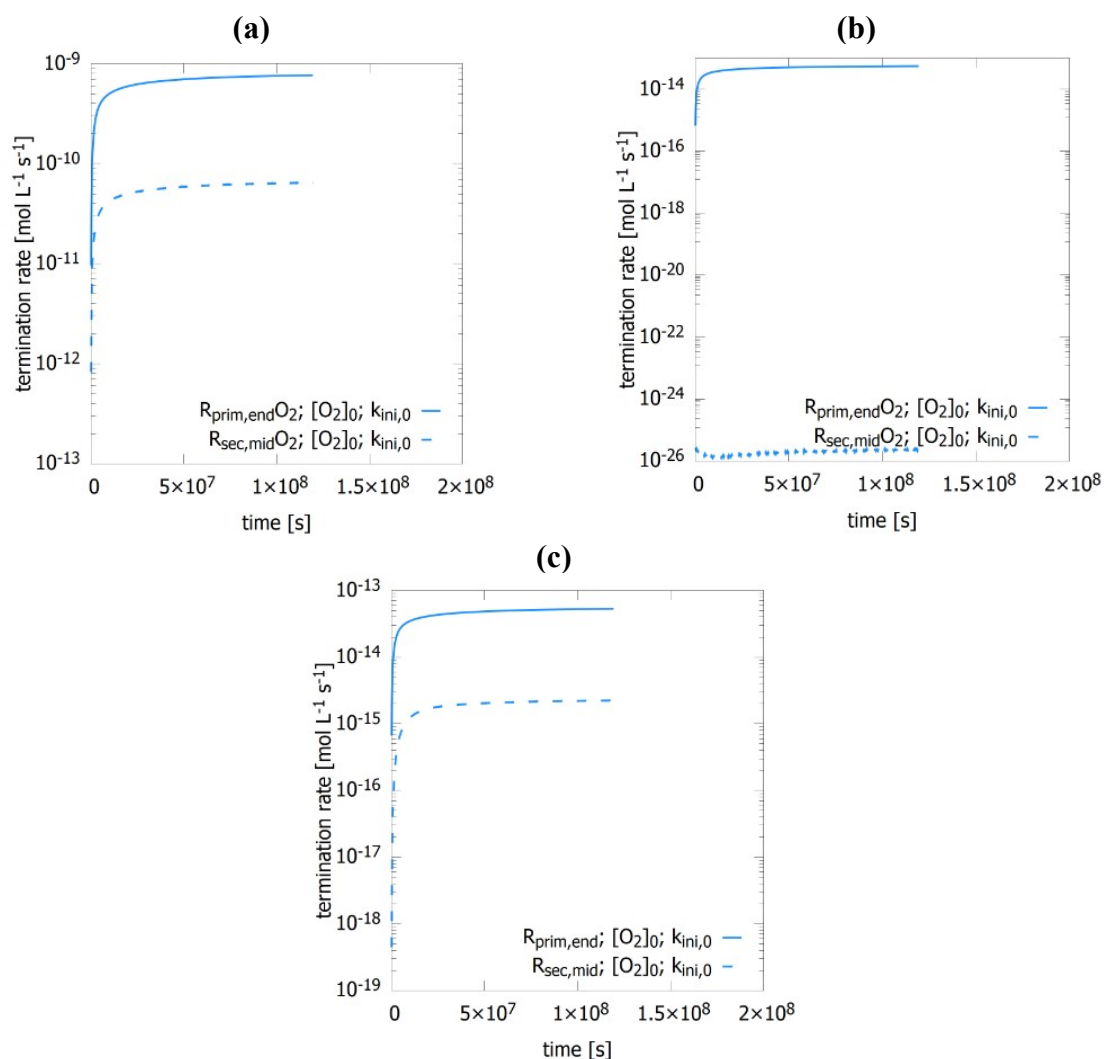

**Figure S15.** Termination reaction rates for poly(ethylene) ( $\text{mol L}^{-1} \text{s}^{-1}$ ) for: **(a)** termination between two alkylperoxyl radicals ( $\text{RO}_2^* + \text{RO}_2^*$ ), **(b)** and **(c)** termination between alkylperoxyl radical and alkyl radical ( $\text{RO}_2^* + \text{R}^*$ ); reaction partner under consideration is specified in legend; reaction partner related to primary end radicals (full lines) and secondary midchain radicals (dashed lines); termination reaction rates for alkoxy radicals are not shown as they are equal to 0.

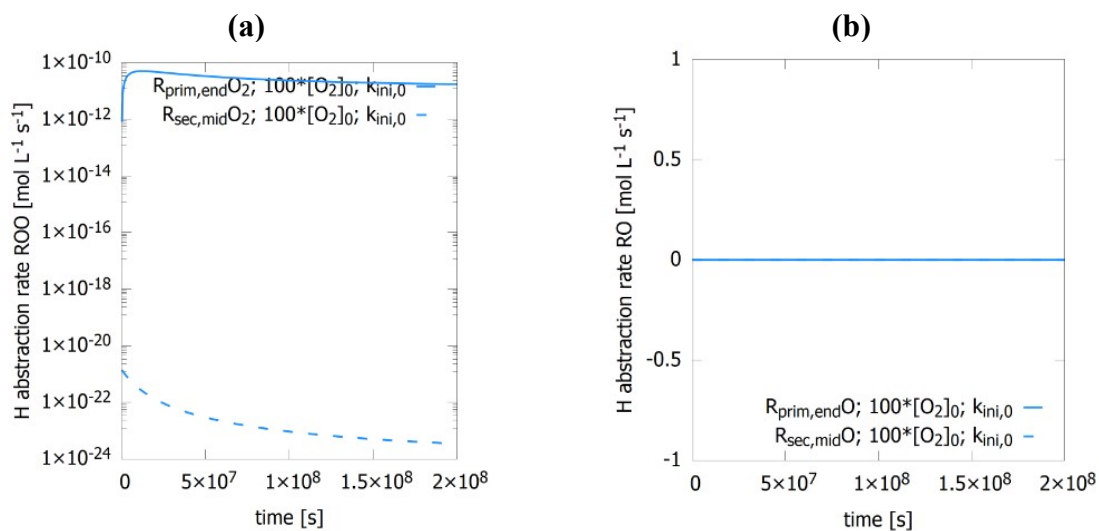

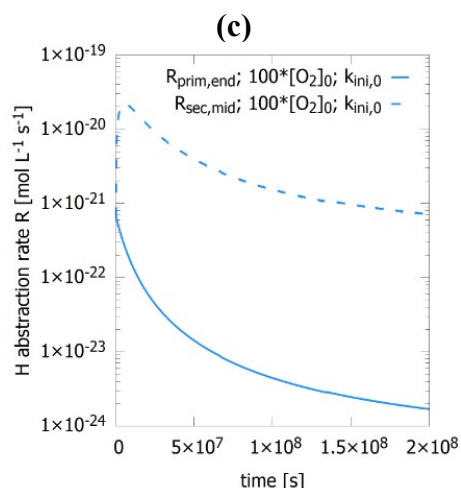

**Figure S16.** Hydrogen abstraction reaction rates for poly(ethylene) with a higher oxygen concentration ( $[O_2] = 100[O_2]_0$ ) ( $\text{mol L}^{-1} \text{s}^{-1}$ ) for: **(a)** alkylperoxyl radicals  $RO_2^*$ , **(b)** alkoxy radicals  $RO^*$  and **(c)** alkyl radicals  $R^*$  as a function of time (s) for primary end radicals (full lines) and secondary midchain radicals (dashed lines).

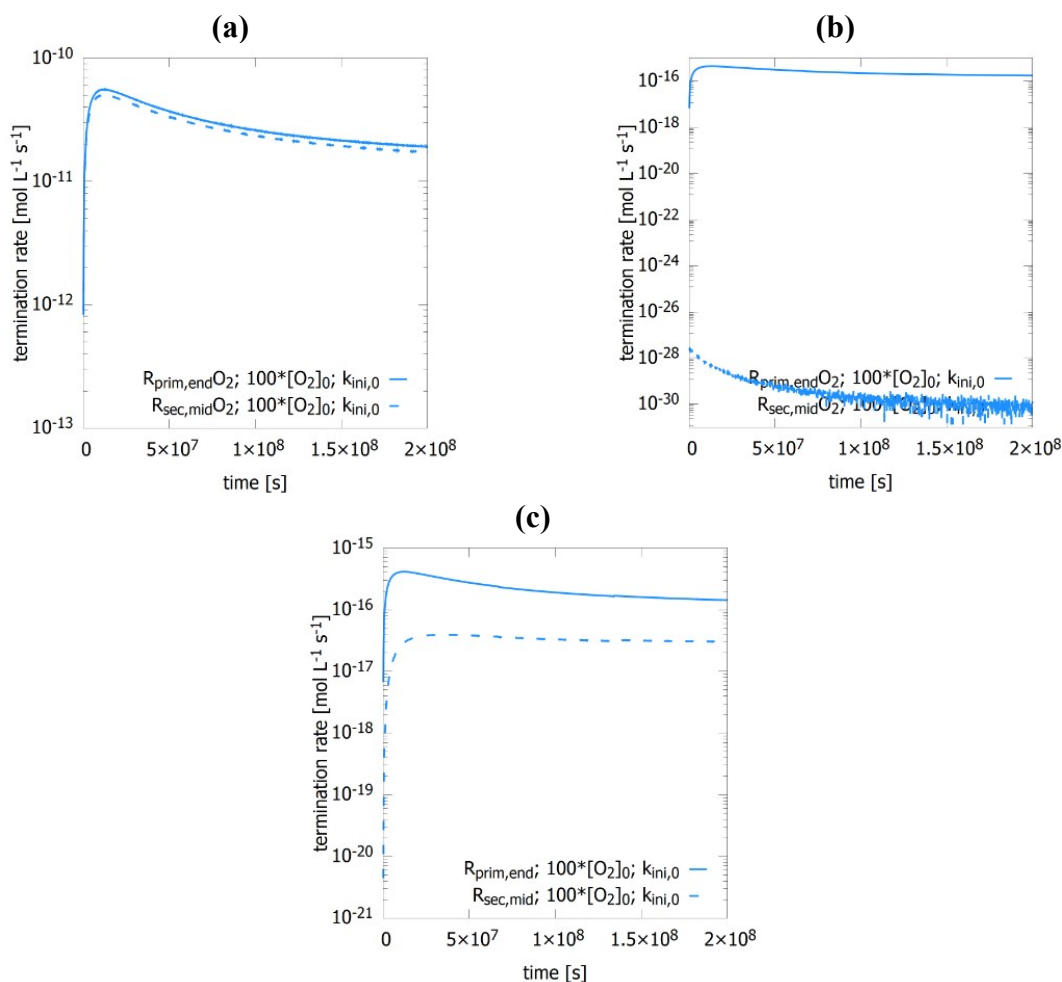

**Figure S17.** Reaction rates for poly(ethylene) with a higher  $O_2$  concentration ( $[O_2] = 100[O_2]_0$ ) ( $\text{mol L}^{-1} \text{s}^{-1}$ ) for: **(a)** termination between two alkylperoxyl radicals ( $RO_2^* + RO_2^*$ ), **(b)** and **(c)** termination between alkylperoxyl radical and alkyl radical ( $RO_2^* + R^*$ ); reaction partner under consideration is specified in legend; reaction partner related to primary end- (full lines) and secondary midchain radicals (dashed lines); termination reaction rates for alkoxy radicals not shown as equal to 0.

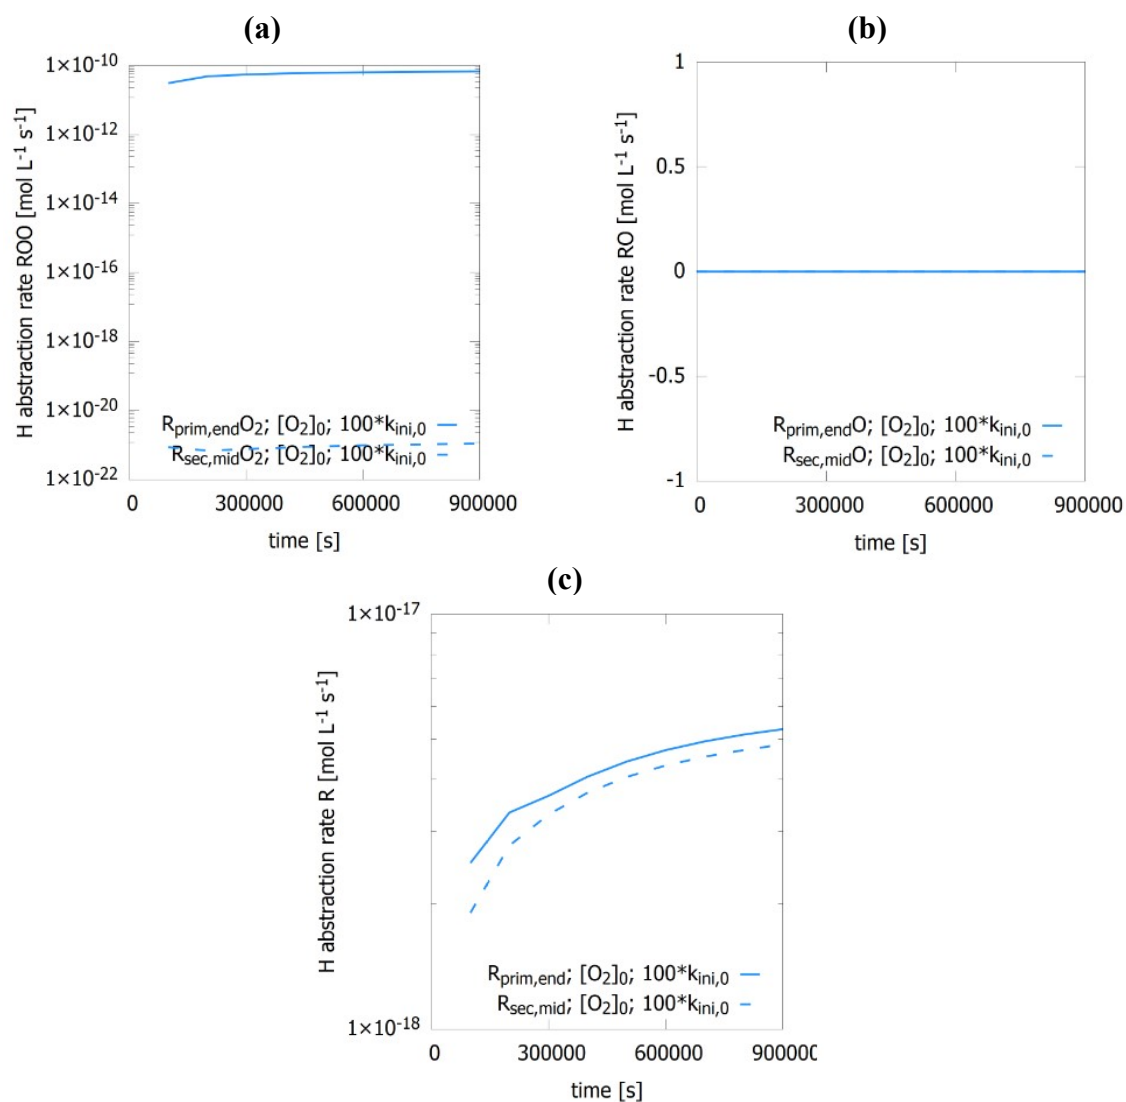

**Figure S18.** Hydrogen abstraction reaction rates for poly(ethylene) with a higher initiation rate coefficient ( $k_{ini} = 100k_{ini,0}$ ) (mol L<sup>-1</sup> s<sup>-1</sup>) for: **(a)** alkylperoxyl radicals  $RO_2^*$ , **(b)** alkoxy radicals  $RO^*$  and **(c)** alkyl radicals  $R^*$  as a function of time (s) for primary end radicals (full lines) and secondary midchain radicals (dashed lines).

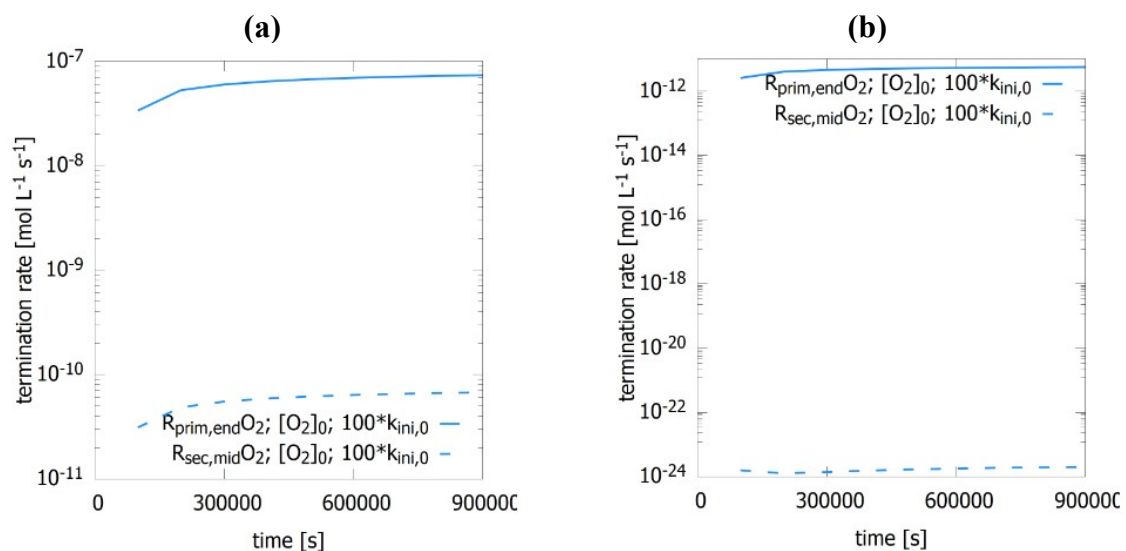

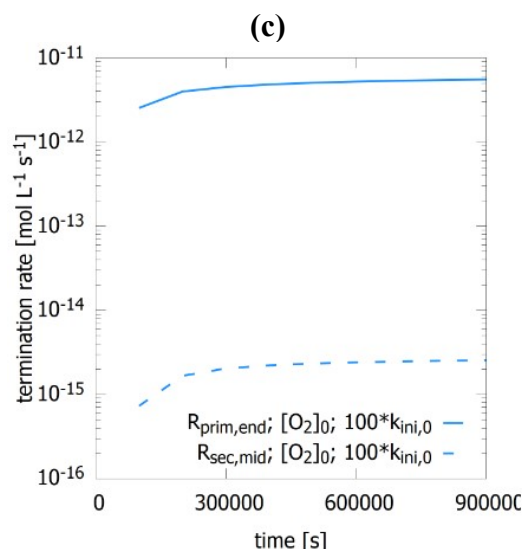

**Figure S19.** Termination reaction rates for poly(ethylene) with a higher initiation rate coefficient ( $k_{\text{ini}} = 100k_{\text{ini},0}$ ) ( $\text{mol L}^{-1} \text{s}^{-1}$ ) for: **(a)** termination between two alkylperoxyl radicals ( $\text{RO}_2^\bullet + \text{RO}_2^\bullet$ ), **(b)** and **(c)** termination between alkylperoxyl radical and alkyl radical ( $\text{RO}_2^\bullet + \text{R}^\bullet$ ); reaction partner under consideration is specified in legend; reaction partner related to primary end radicals (full lines) and secondary midchain radicals (dashed lines); termination reaction rates for alkoxy radicals are not shown as they are equal to 0.

**Table S9.** Summary of  $k\text{MC}$  model output related to reaction rates ( $\text{mol L}^{-1} \text{s}^{-1}$ ) of competitive reactions for poly(ethylene) with a higher  $\text{O}_2$  concentration ( $[\text{O}_2] = 100[\text{O}_2]_0$ ); reaction rates as a function of time are given in Figure S16 and S17; red: lowest reaction rates; green: largest reaction rates; values indicated in black are set equal to 0.

| <i>1<sup>st</sup></i><br><i>reaction</i><br><i>partner</i> | <i>Propagation</i>               |                                |                               |                                             | <i>Termination</i>                          |                                          |                                          |
|------------------------------------------------------------|----------------------------------|--------------------------------|-------------------------------|---------------------------------------------|---------------------------------------------|------------------------------------------|------------------------------------------|
|                                                            | $\text{RO}_2^\bullet + \text{P}$ | $\text{RO}^\bullet + \text{P}$ | $\text{R}^\bullet + \text{P}$ | $\text{RO}_2^\bullet + \text{RO}_2^\bullet$ | $\text{RO}_2^\bullet + \text{RO}_2^\bullet$ | $\text{RO}_2^\bullet + \text{R}^\bullet$ | $\text{R}^\bullet + \text{RO}_2^\bullet$ |
| $\mathbf{R}_{\text{prim,end}}$                             | $3.0 \cdot 10^{-12}$             | 0.0                            | $6.5 \cdot 10^{-23}$          | 0.0                                         | $5.0 \cdot 10^{-11}$                        | $1.0 \cdot 10^{-16}$                     | $1.0 \cdot 10^{-16}$                     |
| $\mathbf{R}_{\text{sec,mid}}$                              | $1.0 \cdot 10^{-23}$             | 0.0                            | $6.5 \cdot 10^{-21}$          | 0.0                                         | $5.0 \cdot 10^{-11}$                        | $1.0 \cdot 10^{-30}$                     | $2.0 \cdot 10^{-17}$                     |

**Table S10.** Summary of  $k\text{MC}$  model output related to reaction rates ( $\text{mol L}^{-1} \text{s}^{-1}$ ) of competitive reactions for poly(ethylene) with a higher initiation rate coefficient ( $k_{\text{ini}} = 100k_{\text{ini},0}$ ); reaction rates as a function of time are given in Figure S18 and S19; red: lowest reaction rates; green: largest reaction rates; values indicated in black are set equal to 0.

| <i>1<sup>st</sup></i><br><i>reaction</i><br><i>partner</i> | <i>Propagation</i>               |                                |                               |                                             | <i>Termination</i>                          |                                          |                                          |
|------------------------------------------------------------|----------------------------------|--------------------------------|-------------------------------|---------------------------------------------|---------------------------------------------|------------------------------------------|------------------------------------------|
|                                                            | $\text{RO}_2^\bullet + \text{P}$ | $\text{RO}^\bullet + \text{P}$ | $\text{R}^\bullet + \text{P}$ | $\text{RO}_2^\bullet + \text{RO}_2^\bullet$ | $\text{RO}_2^\bullet + \text{RO}_2^\bullet$ | $\text{RO}_2^\bullet + \text{R}^\bullet$ | $\text{R}^\bullet + \text{RO}_2^\bullet$ |
| $\mathbf{R}_{\text{prim,end}}$                             | $5.0 \cdot 10^{-11}$             | 0.0                            | $5.0 \cdot 10^{-18}$          | 0.0                                         | $7.5 \cdot 10^{-8}$                         | $1.0 \cdot 10^{-12}$                     | $5.0 \cdot 10^{-12}$                     |
| $\mathbf{R}_{\text{sec,mid}}$                              | $1.0 \cdot 10^{-21}$             | 0.0                            | $5.0 \cdot 10^{-18}$          | 0.0                                         | $7.0 \cdot 10^{-11}$                        | $1.0 \cdot 10^{-24}$                     | $2.0 \cdot 10^{-15}$                     |

#### S4.4. Additional simulation results for poly(isobutylene)

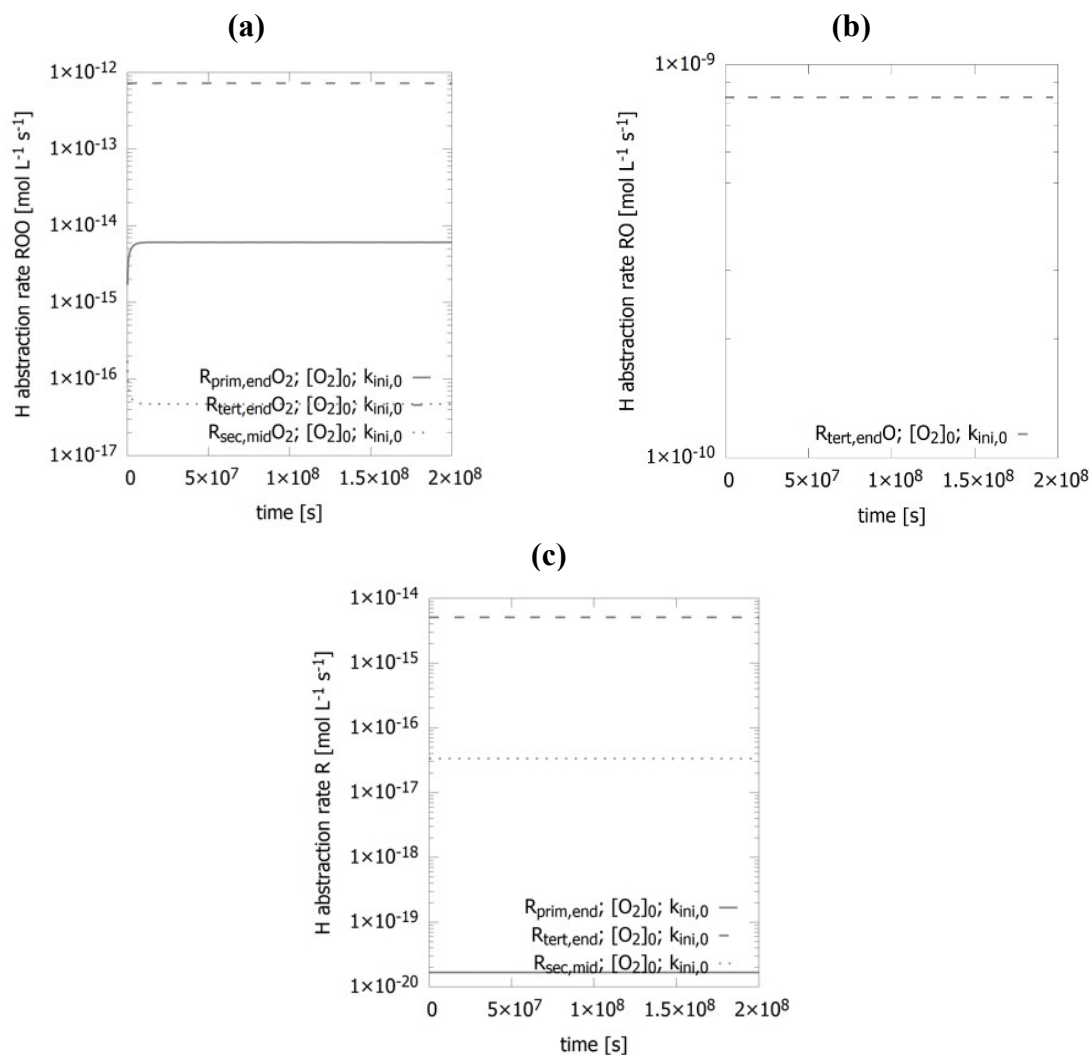

**Figure S20.** Hydrogen abstraction reaction rates for poly(isobutylene) (mol L<sup>-1</sup> s<sup>-1</sup>) for: **(a)** alkylperoxyl radicals RO<sub>2</sub><sup>•</sup>, **(b)** alkoxy radicals RO<sup>•</sup> and **(c)** alkyl radicals R<sup>•</sup> as a function of time (s) for primary end radicals (full lines), tertiary end radicals (dashed lines) and secondary midchain radicals (dotted lines).

**(a)**

**(b)**



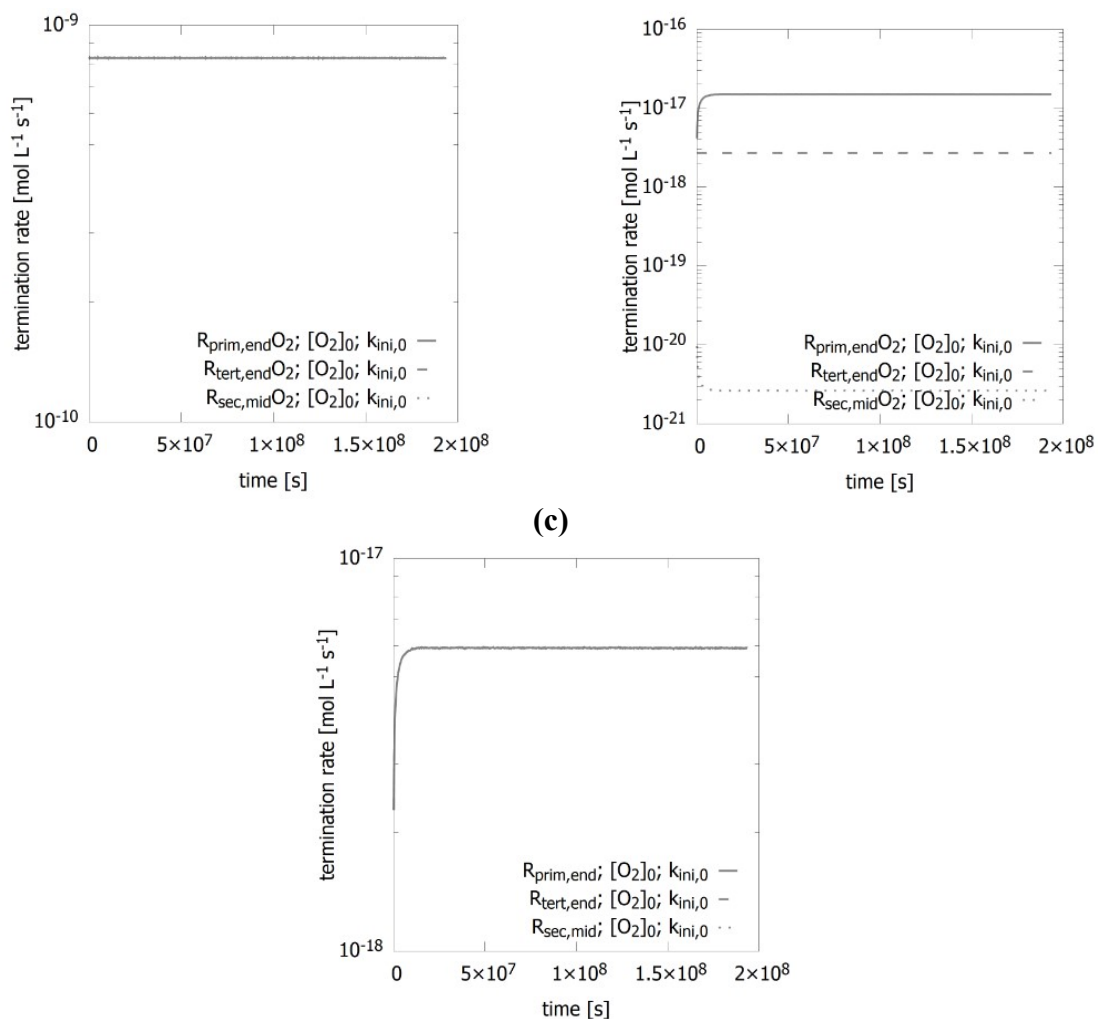

**Figure S21.** Termination reaction rates for poly(isobutylene) ( $\text{mol L}^{-1} \text{s}^{-1}$ ) for: **(a)** termination between two alkylperoxyl radicals ( $\text{RO}_2^\bullet + \text{RO}_2^\bullet$ ), **(b)** and **(c)** termination between alkylperoxyl radical and alkyl radical ( $\text{RO}_2^\bullet + \text{R}^\bullet$ ); reaction partner under consideration is specified in legend; reaction partner related to primary end radicals (full lines) and secondary midchain radicals (dashed lines); termination reaction rates for alkoxy radicals are not shown as they are equal to 0.

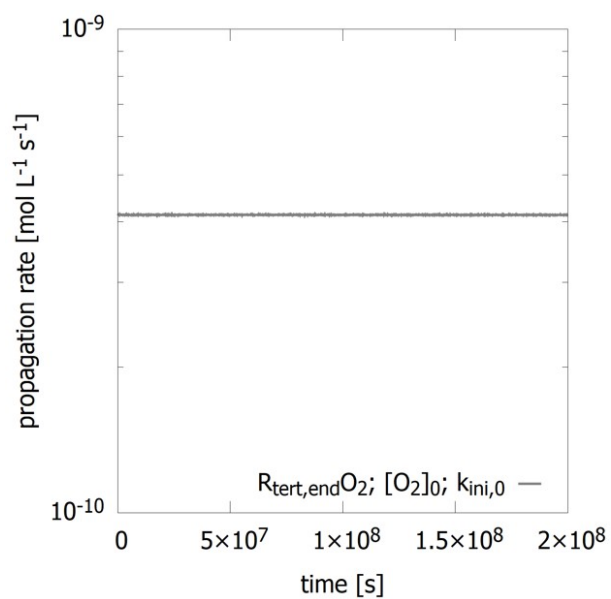

**Figure S22.** Propagation reaction rates for poly(isobutylene) ( $\text{mol L}^{-1} \text{s}^{-1}$ ) for reaction between two tertiary end alkylperoxyl radicals ( $R_{\text{tert, end}}\text{O}_2^{\bullet} + R_{\text{tert, end}}\text{O}_2^{\bullet}$ ) with the formation of two alkoxy radicals ( $R_{\text{tert, end}}\text{O}^{\bullet}$ ).

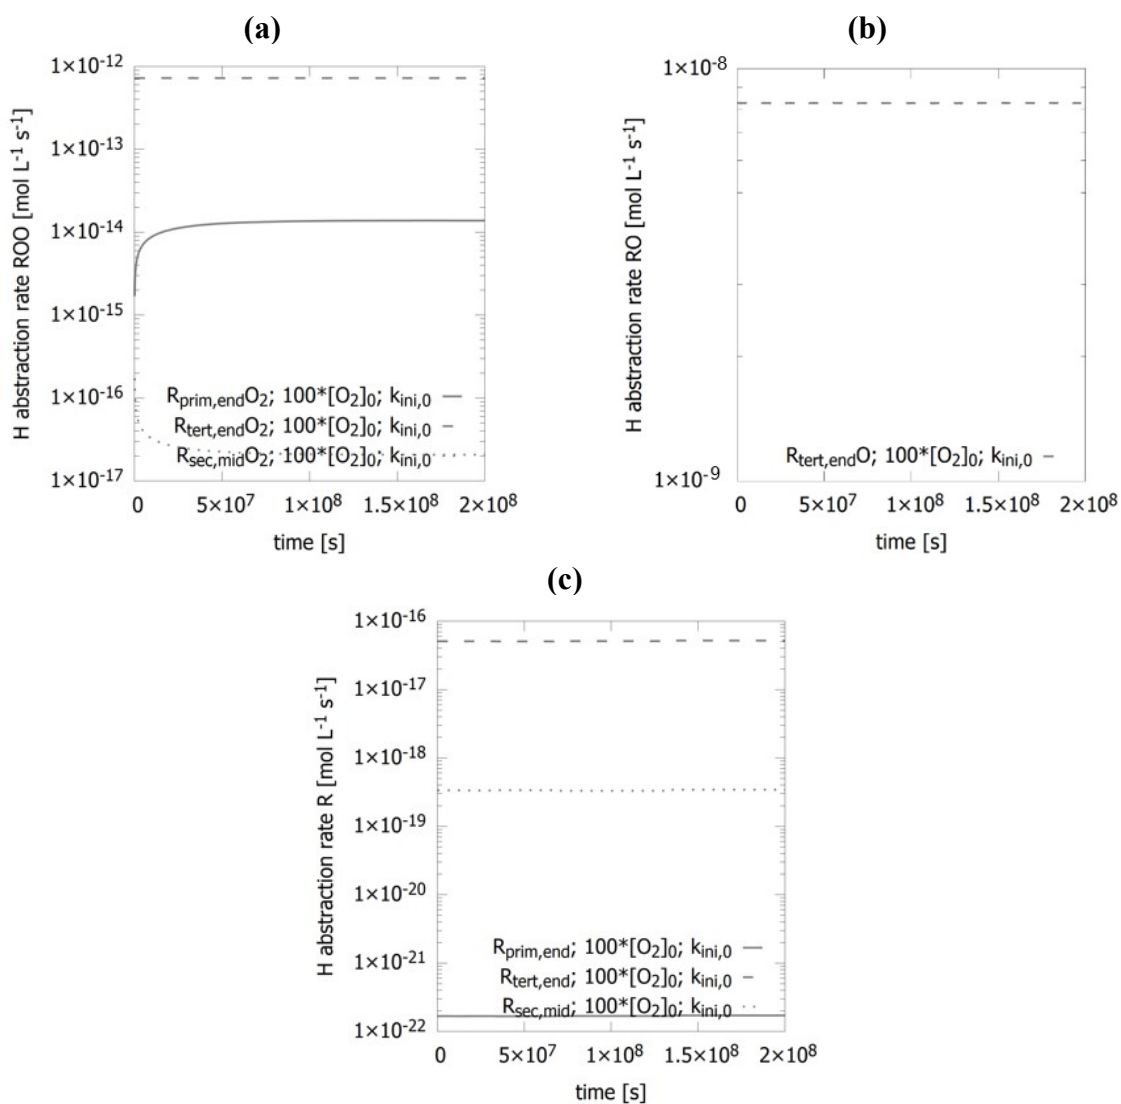

**Figure S23.** Hydrogen abstraction reaction rates for poly(isobutylene) with a higher oxygen concentration ( $[O_2] = 100[O_2]_0$ ) ( $mol\ L^{-1}\ s^{-1}$ ) for: **(a)** alkylperoxyl radicals  $RO_2\cdot$ , **(b)** alkoxy radicals  $RO\cdot$  and **(c)** alkyl radicals  $R\cdot$  as a function of time (s) for primary end radicals (full lines), tertiary end radicals (dashed lines) and secondary midchain radicals (dotted lines).

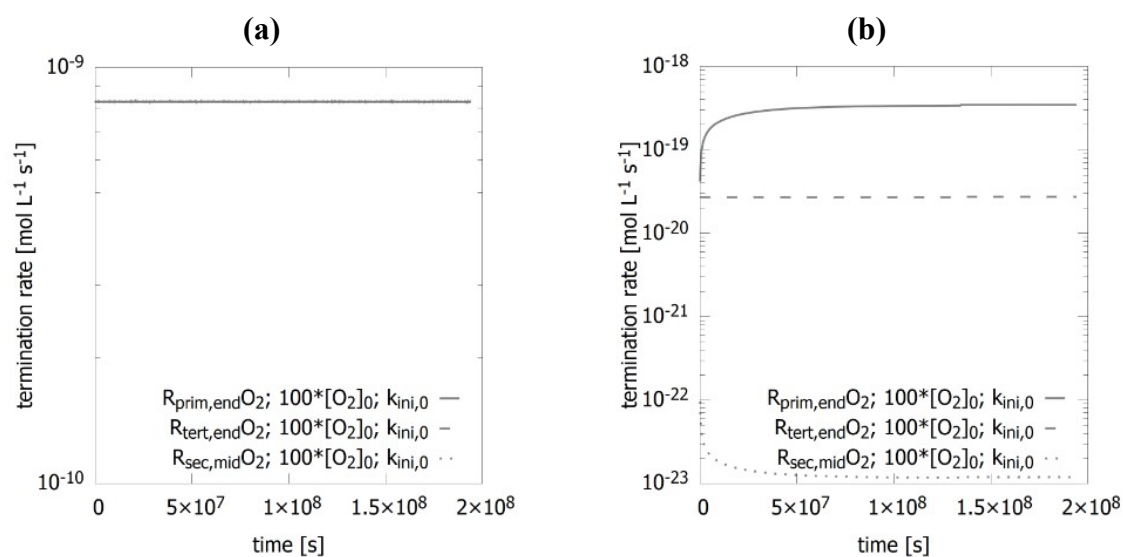

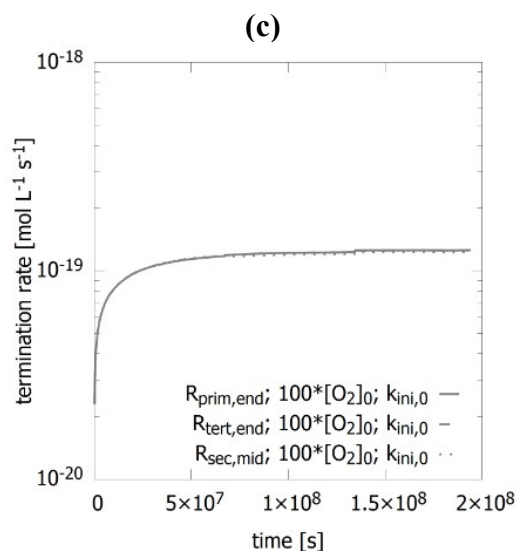

**Figure S24.** Termination reaction rates for poly(isobutylene) with a higher oxygen concentration ( $[O_2] = 100[O_2]_0$ ) ( $\text{mol L}^{-1} \text{s}^{-1}$ ) for: **(a)** termination between two alkylperoxyl radicals ( $RO_2^\bullet + RO_2^\bullet$ ), **(b)** and **(c)** termination between alkylperoxyl radical and alkyl radical ( $RO_2^\bullet + R^\bullet$ ); reaction partner under consideration is specified in legend; reaction partner related to primary end radicals (full lines) and secondary midchain radicals (dashed lines); termination reaction rates for alkoxy radicals are not shown as they are equal to 0.

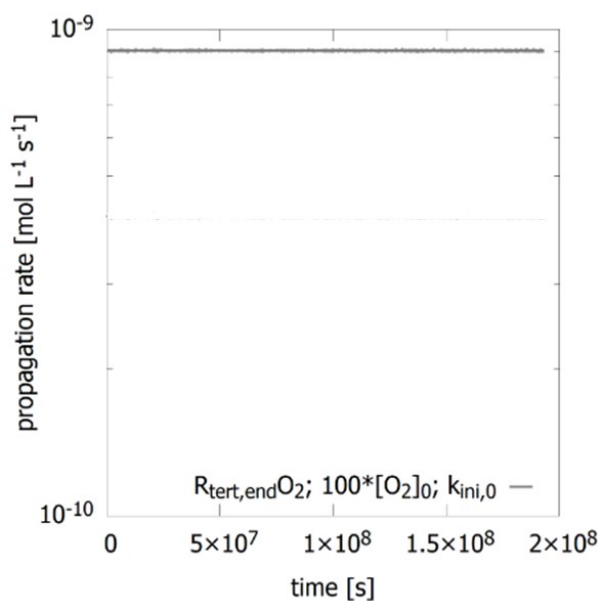

**Figure S25.** Propagation reaction rates for poly(isobutylene) with a higher oxygen concentration ( $[O_2] = 100[O_2]_0$ ) ( $\text{mol L}^{-1} \text{s}^{-1}$ ) for reaction between two tertiary end alkylperoxyl radicals ( $R_{\text{tert,end}O_2}^\bullet + R_{\text{tert,end}O_2}^\bullet$ ) with the formation of two alkoxy radicals ( $R_{\text{tert,end}O}$ ).

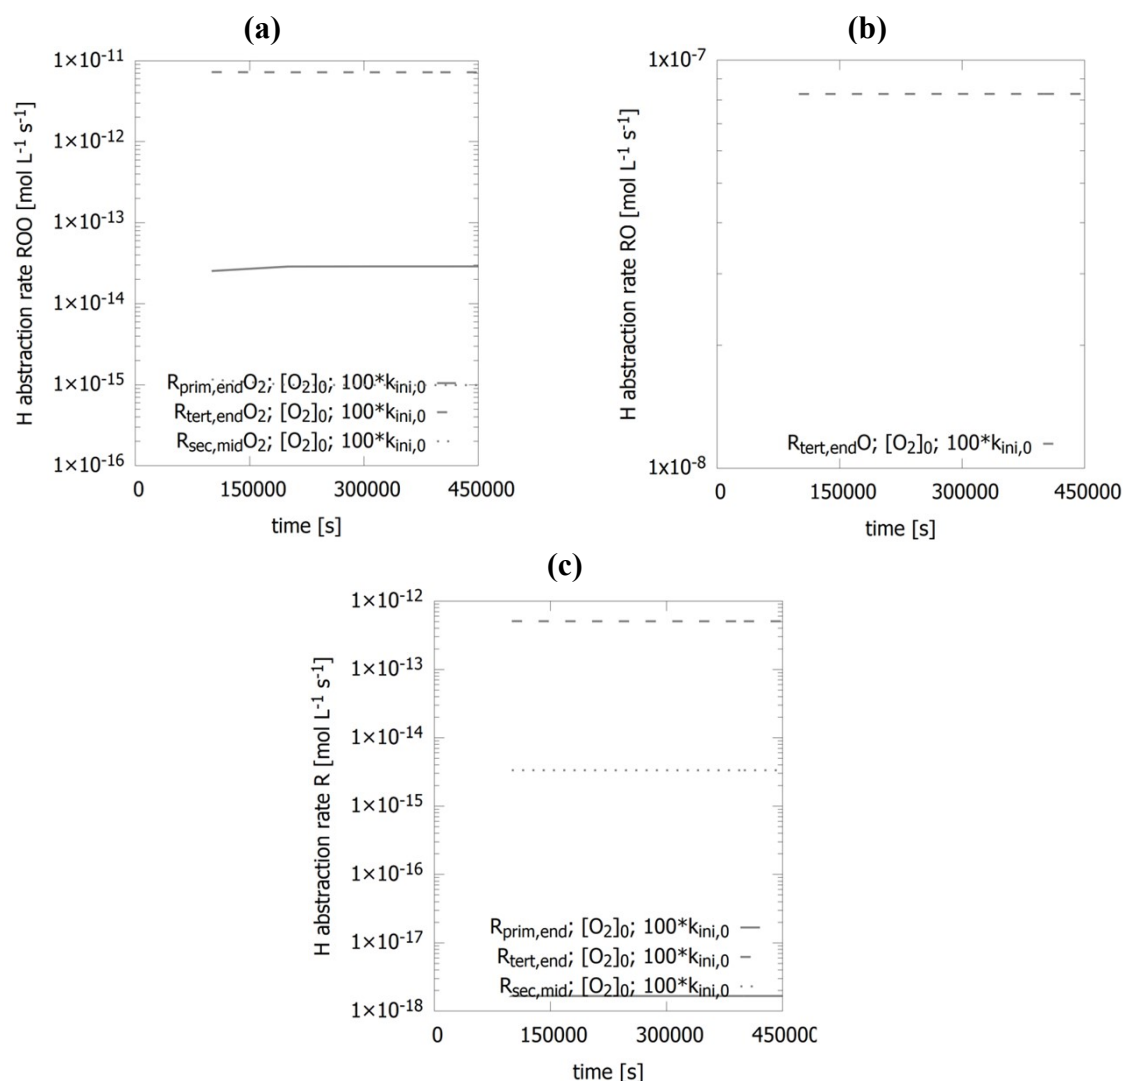

**Figure S26.** Hydrogen abstraction reaction rates for poly(isobutylene) with a higher initiation rate coefficient ( $k_{ini} = 100k_{ini}$ ) ( $\text{mol L}^{-1} \text{s}^{-1}$ ) for: **(a)** alkylperoxyl radicals  $RO_2^*$ , **(b)** alkoxy radicals  $RO^*$  and **(c)** alkyl radicals  $R^*$  as a function of time (s) for primary end radicals (full lines), tertiary end radicals (dashed lines) and secondary midchain radicals (dotted lines).

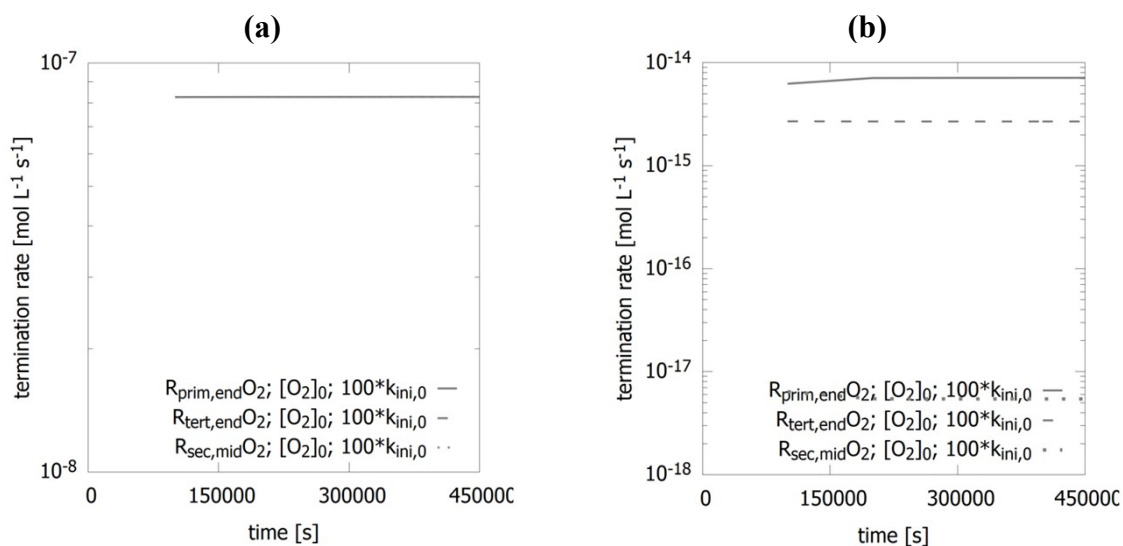

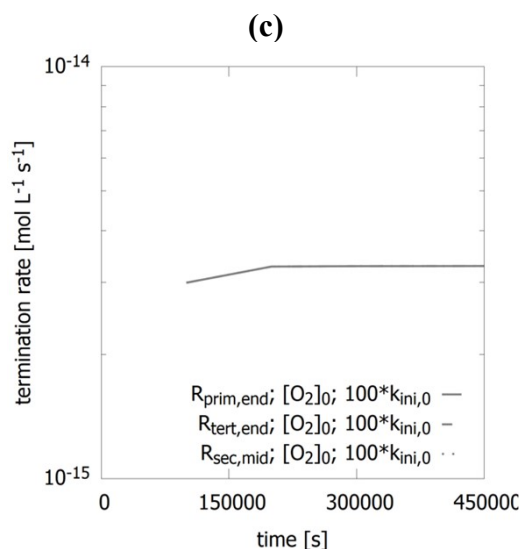

**Figure S27.** Termination reaction rates for poly(isobutylene) with a higher initiation rate coefficient ( $k_{\text{ini}} = 100k_{\text{ini}}$ ) ( $\text{mol L}^{-1} \text{s}^{-1}$ ) for: **(a)** termination between two alkylperoxy radicals ( $\text{RO}_2^\bullet + \text{RO}_2^\bullet$ ), **(b)** and **(c)** termination between alkylperoxy radical and alkyl radical ( $\text{RO}_2^\bullet + \text{R}^\bullet$ ); reaction partner under consideration is specified in legend; reaction partner related to primary end radicals (full lines) and secondary midchain radicals (dashed lines); termination reaction rates for alkoxy radicals are not shown as they are equal to 0.

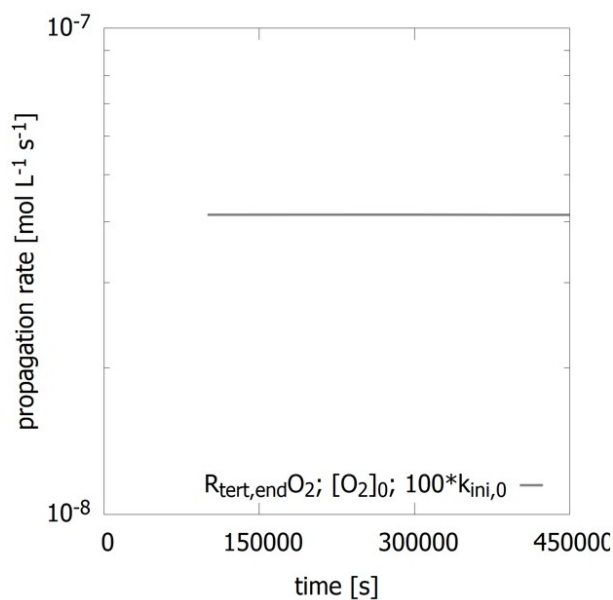

**Figure S28.** Propagation reaction rates for poly(isobutylene) with a higher initiation rate coefficient ( $k_{\text{ini}} = 100k_{\text{ini}}$ ) ( $\text{mol L}^{-1} \text{s}^{-1}$ ) for reaction between two tertiary end alkylperoxy radicals ( $\text{R}_{\text{tert,end}}\text{O}_2^\bullet + \text{R}_{\text{tert,end}}\text{O}_2^\bullet$ ) with the formation of two alkoxy radicals ( $\text{R}_{\text{tert,end}}\text{O}^\bullet$ ).

**Table S11.** Summary of *k*MC model output related to reaction rates (mol L<sup>-1</sup> s<sup>-1</sup>) of competitive reactions for poly(isobutylene) with a higher oxygen concentration ([O<sub>2</sub>] = 100[O<sub>2</sub>]<sub>0</sub>); reaction rates as a function of time are given in Figure S23 to S25; red: lowest reaction rates; green: largest reaction rates; values indicated in black are set equal to 0.

| <i>I</i> <sup>st</sup><br>reaction<br>partner | <i>Propagation</i>               |                      |                       |                                                             | <i>Termination</i>                                          |                                               |                                               |
|-----------------------------------------------|----------------------------------|----------------------|-----------------------|-------------------------------------------------------------|-------------------------------------------------------------|-----------------------------------------------|-----------------------------------------------|
|                                               | RO <sub>2</sub> <sup>•</sup> + P | RO <sup>•</sup> + P  | R <sup>•</sup> + P    | RO <sub>2</sub> <sup>•</sup> + RO <sub>2</sub> <sup>•</sup> | RO <sub>2</sub> <sup>•</sup> + RO <sub>2</sub> <sup>•</sup> | RO <sub>2</sub> <sup>•</sup> + R <sup>•</sup> | R <sup>•</sup> + RO <sub>2</sub> <sup>•</sup> |
| <b>R</b> <sub>prim,end</sub>                  | 1.0 10 <sup>-14</sup>            | 0.0                  | 1.0 10 <sup>-22</sup> | 0.0                                                         | 8.0 10 <sup>-9</sup>                                        | 3.0 10 <sup>-19</sup>                         | 1.0 10 <sup>-19</sup>                         |
| <b>R</b> <sub>tert,end</sub>                  | 7.0 10 <sup>-13</sup>            | 8.0 10 <sup>-9</sup> | 5.0 10 <sup>-17</sup> | 1.0 10 <sup>-9</sup>                                        | 0.0                                                         | 3.0 10 <sup>-20</sup>                         | 1.0 10 <sup>-19</sup>                         |
| <b>R</b> <sub>sec,mid</sub>                   | 2.0 10 <sup>-17</sup>            | 0.0                  | 3.0 10 <sup>-19</sup> | 0.0                                                         | 8.0 10 <sup>-9</sup>                                        | 1.0 10 <sup>-23</sup>                         | 1.0 10 <sup>-19</sup>                         |

**Table S12.** Summary of *k*MC model output related to reaction rates (mol L<sup>-1</sup> s<sup>-1</sup>) of competitive reactions for poly(isobutylene) with a higher initiation rate coefficient (k<sub>ini</sub> = 100k<sub>ini</sub>); reaction rates as a function of time are given in Figure S26 to S28; red: lowest reaction rates; green: largest reaction rates; values indicated in black are set equal to 0.

| <i>I</i> <sup>st</sup><br>reaction<br>partner | <i>Propagation</i>               |                      |                       |                                                             | <i>Termination</i>                                          |                                               |                                               |
|-----------------------------------------------|----------------------------------|----------------------|-----------------------|-------------------------------------------------------------|-------------------------------------------------------------|-----------------------------------------------|-----------------------------------------------|
|                                               | RO <sub>2</sub> <sup>•</sup> + P | RO <sup>•</sup> + P  | R <sup>•</sup> + P    | RO <sub>2</sub> <sup>•</sup> + RO <sub>2</sub> <sup>•</sup> | RO <sub>2</sub> <sup>•</sup> + RO <sub>2</sub> <sup>•</sup> | RO <sub>2</sub> <sup>•</sup> + R <sup>•</sup> | R <sup>•</sup> + RO <sub>2</sub> <sup>•</sup> |
| <b>R</b> <sub>prim,end</sub>                  | 3.0 10 <sup>-14</sup>            | 0.0                  | 2.0 10 <sup>-18</sup> | 0.0                                                         | 8.0 10 <sup>-8</sup>                                        | 7.0 10 <sup>-15</sup>                         | 3.0 10 <sup>-15</sup>                         |
| <b>R</b> <sub>tert,end</sub>                  | 7.0 10 <sup>-12</sup>            | 8.0 10 <sup>-8</sup> | 5.0 10 <sup>-13</sup> | 4.0 10 <sup>-8</sup>                                        | 0.0                                                         | 3.0 10 <sup>-15</sup>                         | 3.0 10 <sup>-15</sup>                         |
| <b>R</b> <sub>sec,mid</sub>                   | 1.0 10 <sup>-15</sup>            | 0.0                  | 3.0 10 <sup>-15</sup> | 0.0                                                         | 8.0 10 <sup>-8</sup>                                        | 5.0 10 <sup>-18</sup>                         | 3.0 10 <sup>-15</sup>                         |

## S5. References

1. Maillard, B.; Ingold, K. U.; Scaiano, J. C. *Journal of the American Chemical Society* **1983**, 105 (15), 5095-5099.
2. Gryn'ova, G.; Hodgson, J. L.; Coote, M. L. *Org. Biomol. Chem.* **2011**, 9 (2), 480-490.
3. Sabbe, M. K.; Reyniers, M.-F.; Van Speybroeck, V.; Waroquier, M.; Marin, G. B. *ChemPhysChem* **2008**, 9 (1), 124-140.
4. Denisov, E. T.; Denisova, T. G., *Handbook of Antioxidants. Bond Dissociation Energies, Rate Constants, Activation Energies and Enthalpies of Reaction, 2th Editions*. CRC Press: Boca Raton: Moscow, Russia, 1999.
5. Brandup, J.; Immergut, E. H.; Grulke, E. A., *Polymer Handbook, 4th Edition*. John Wiley & Sons: 1999.
6. Roland, C. M.; Boehm, G. G. A. *Macromolecules* **1985**, 18 (6), 1310-1314.
7. Lee, R.; Gryn'ova, G.; Ingold, K. U.; Coote, M. L. *Phys. Chem. Chem. Phys.* **2016**, 18 (34), 23673-23679.
8. Ingold, K. U., Group 2: Molecules and Radicals - Radical Reaction Rates in Liquids. Fischer, H., Ed. Springer-Verlag: Berlin, 1994; Vol. 18.
9. Neta, P.; Huie, R. E.; Ross, A. B. *Journal of Physical and Chemical Reference Data* **1990**, 19 (2), 413-513.
